# Supplementary material for: Visible light-induced selenylative spirocyclization of biaryl ynones toward the formation of selenated spiro[5.5]trienones
Source: Royal Society of Chemistry journal article supplement (doi:10.1039/d2ob01006b), 2022-01-01

# Visible Light-Promoted Selenylative Spirocyclization of Biaryl Ynones toward the Formation of Selenated Spiro[5.5]trienones

Zhichao Chen,<sup>a</sup> Xinran Zheng,<sup>b</sup> Shu-Feng Zhou,<sup>\*,a</sup> and Xiuling Cui<sup>\*,b</sup>

<sup>a</sup>College of Chemical Engineering, Huaqiao University, Xiamen, Fujian 361021, P. R. China.

<sup>b</sup>Engineering Research Centre of Molecular Medicine of Ministry of Education, Key Laboratory of Fujian Molecular Medicine, Key Laboratory of Precision Medicine and Molecular Diagnosis of Fujian Universities, Key Laboratory of Xiamen Marine and Gene Drugs, School of Biomedical Sciences, Huaqiao University, Xiamen 361021, P. R. China.

Corresponding Author: Xiuling Cui and Shu-Feng Zhou

Email: cuixl@hqu.edu.cn

Email: szhou@hqu.edu.cn

Tel & Fax: +86-592-6162996

|                                                                                                          |     |
|----------------------------------------------------------------------------------------------------------|-----|
| 1. General information.....                                                                              | S1  |
| 2. General procedure for the synthesis of <b>3</b> .....                                                 | S1  |
| 3. Mechanism experiments and large-scale synthesis of <b>3aa</b> .....                                   | S2  |
| 4. X-ray crystallographic data of <b>3ac</b> and <b>3af</b> .....                                        | S3  |
| 5. Characterization of compounds <b>3</b> .....                                                          | S5  |
| 6. References.....                                                                                       | S14 |
| 7. Copies of the <sup>1</sup> H, <sup>13</sup> C, <sup>19</sup> F and <sup>77</sup> Se NMR spectra ..... | S15 |

## 1. General information

Unless otherwise stated, all commercial materials and solvents were used directly without further purification.  $^1\text{H}$  and  $^{13}\text{C}$  NMR spectra were measured on a 400 MHz Bruker spectrometer ( $^1\text{H}$  400MHz,  $^{13}\text{C}$  100MHz,  $^{19}\text{F}$  NMR 376 MHz), using  $\text{CDCl}_3$  (spectra were referenced to the solvent peaks  $^1\text{H}$ : residual  $\text{CDCl}_3 = 7.26$  ppm,  $^{13}\text{C}$ :  $\text{CDCl}_3 = 77.0$  ppm)) as the solvent. High-resolution mass spectra (HRMS) were measured on ESI-TOF. Column chromatography was performed on silica gel (70-230 mesh ASTM) using the reported eluent. Thin-layer chromatography (TLC) was carried out on 4×5 cm plates with a layer thickness of 0.2 mm (silica gel 60 F254). Photochemical reactions were performed with a LED reactor WP-TEC-1020HSL (WATTCAS, China). Starting materials diselenides **2**, biaryl ynones **1** were prepared according to the literatures.<sup>S1,S2</sup>

## 2. General catalytic procedure for the synthesis of **3**

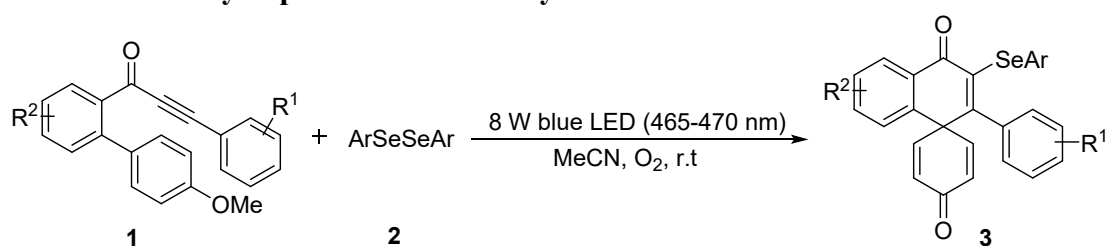

Biaryl ynones **1** (0.2 mmol), diselenides **2** (0.4 mmol), and 1.5 mL  $\text{MeCN}$  were added in a quartz tube. Then the mixture was stirred at room temperature ( $\text{rt}$ ) for 12 h in the photochemical reactor with 8 W blue LED as light source under  $\text{O}_2$  atmosphere. After completion of the biaryl ynones, the solvent was removed under reduced pressure by rotary evaporator. Then, the residue was purified by silica gel column chromatography to give the desired products **3**.

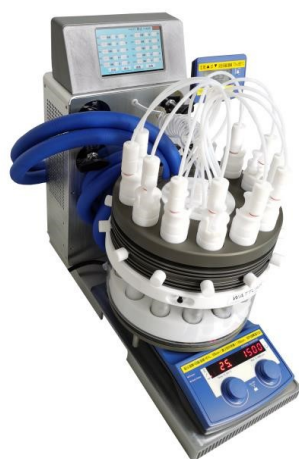

**Figure. S1** The WP-TEC-1020HSL photochemical reaction system with the blue light LED

### 3. Mechanism experiments and large-scale synthesis of **3aa**

#### (1) Trapping experiment with 2,2,6,6-tetramethylpiperidin-1-oxyl (TEMPO)

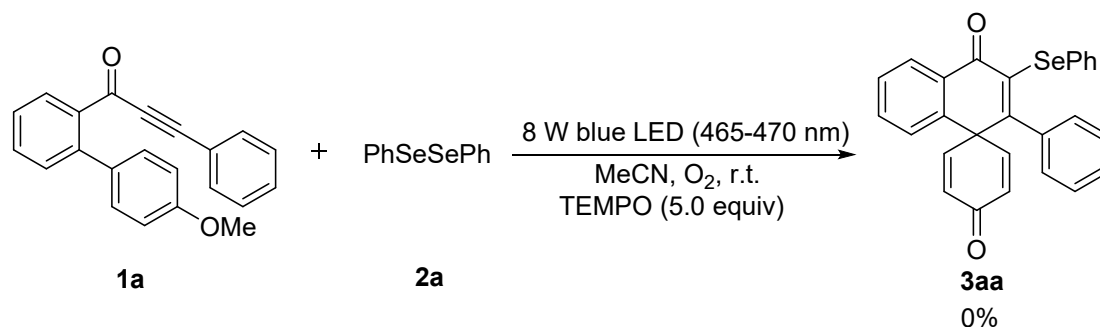

Biaryl ynone **1a** (0.2 mmol), diphenyl diselenide **2a** (0.4 mmol), TEMPO (1 mmol, 5.0 equiv) and 1.5 mL MeCN were added in a quartz tube. Then the mixture was stirred at rt for 12 h in the photochemical reactor with 8 W blue LED as light source under O<sub>2</sub> atmosphere. The resulting mixture was monitored by TLC.

#### (2) Trapping experiment with ethene-1,1-diyldibenzene

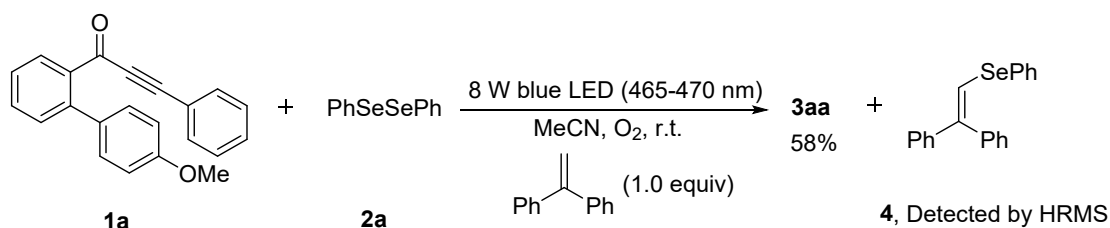

Biaryl ynone **1a** (0.2 mmol), diphenyl diselenide **2a** (0.4 mmol), ethene-1,1-diyldibenzene (0.2 mmol, 1.0 equiv) and 1.5 mL MeCN were added in a quartz tube. Then the mixture was stirred at rt for 12 h in the photochemical reactor with 8 W blue LED as light source under O<sub>2</sub> atmosphere. The solvent was removed under reduced pressure, purification was performed by flash column chromatography on silica gel with petroleum ether/ethyl acetate as eluent to give the corresponding compound **3aa**, and **4** was detected by HRMS (Figure S2). HRMS (ESI) *m/z* calcd for C<sub>20</sub>H<sub>17</sub>Se [M+H]<sup>+</sup> 337.0490, found 337.0489.

| Sample Name | Sample4         | Position               | P1-44   | Instrument Name | Instrument 1         |
|-------------|-----------------|------------------------|---------|-----------------|----------------------|
| User Name   |                 | Inj Vol                | 5       | InjPosition     |                      |
| Sample Type | Sample          | IRM Calibration Status | Success | Data Filename   | c-se-1.d             |
| ACQ Method  | MeOH 100 3min.m | Comment                |         | Acquired Time   | 11/1/2021 4:02:46 PM |

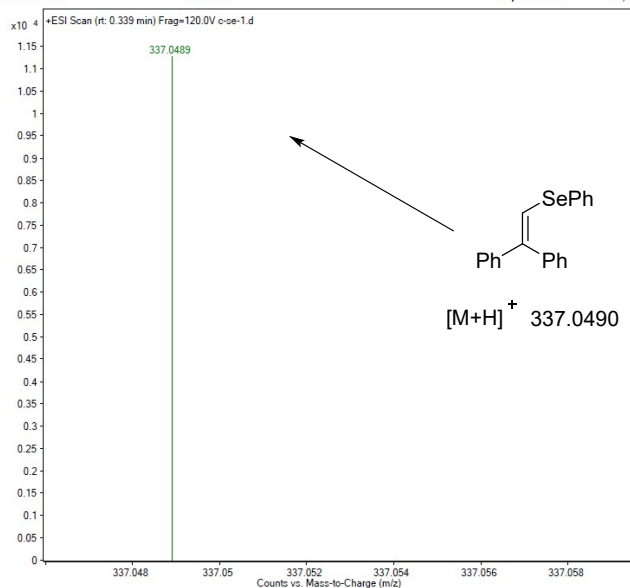

**Figure. S2**

### (3) Large-scale synthesis of **3aa**

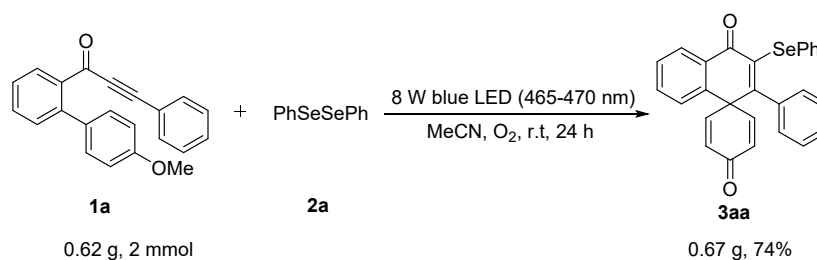

Biaryl ynone **1a** (2 mmol), diphenyl diselenide **2a** (4 mmol), and 4 mL MeCN were added in a quartz tube. Then the mixture was stirred at rt for 24 h in the photochemical reactor with 8 W blue LED as light source under O<sub>2</sub> atmosphere. After completion of the biaryl ynone, the solvent was removed under reduced pressure by rotary evaporator. Then, the residue was purified by silica gel column chromatography to give the desired products **3aa**.

### 4. X-ray data of compound **3ga** and **3af**

Single crystal suitable for X-ray diffraction experiment was obtained by slow evaporation of DCM/*n*-hexane (1:10, V/V) solution containing the compound **3ac** and **3af**.

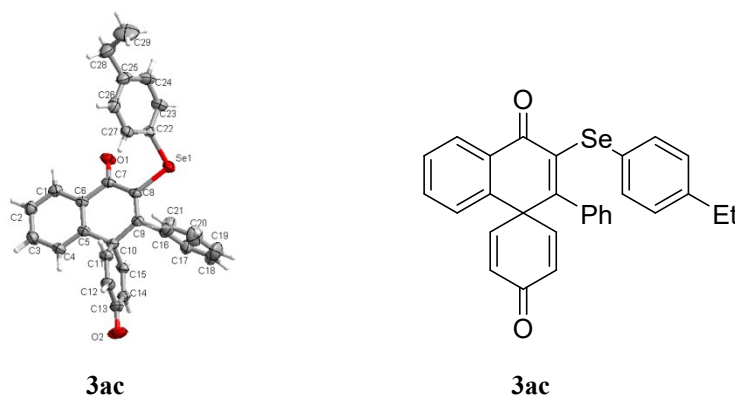

**Figure S1. X-ray molecular structure of **3ac** with the probability at 50% level.**

Table 1 Crystal data and structure refinement for 3ac.

|                                             |                                                   |
|---------------------------------------------|---------------------------------------------------|
| Empirical formula                           | C <sub>29</sub> H <sub>22</sub> O <sub>2</sub> Se |
| Formula weight                              | 481.42                                            |
| Temperature/K                               | 293(2)                                            |
| Crystal system                              | triclinic                                         |
| Space group                                 | P-1                                               |
| a/Å                                         | 9.6751(8)                                         |
| b/Å                                         | 10.1384(10)                                       |
| c/Å                                         | 13.4857(12)                                       |
| α /°                                        | 107.731(8)                                        |
| β /°                                        | 109.770(8)                                        |
| γ /°                                        | 93.109(7)                                         |
| Volume/Å <sup>3</sup>                       | 1167.3(2)                                         |
| Z                                           | 2                                                 |
| ρ calcd/cm <sup>3</sup>                     | 1.370                                             |
| μ /mm <sup>-1</sup>                         | 2.352                                             |
| F(000)                                      | 492.0                                             |
| Crystal size/mm <sup>3</sup>                | 0.16 × 0.12 × 0.1                                 |
| Radiation                                   | CuKα (λ = 1.54184)                                |
| 2θ range for data collection/°              | 7.418 to 134.15                                   |
| Index ranges                                | -11 ≤ h ≤ 7, -12 ≤ k ≤ 12, -14 ≤ l ≤ 16           |
| Reflections collected                       | 8277                                              |
| Independent reflections                     | 4167 [Rint = 0.0409, Rsigma = 0.0542]             |
| Data/restraints/parameters                  | 4167/4/298                                        |
| Goodness-of-fit on F <sup>2</sup>           | 1.064                                             |
| Final R indexes [I ≥ 2σ (I)]                | R1 = 0.0455, wR2 = 0.1041                         |
| Final R indexes [all data]                  | R1 = 0.0626, wR2 = 0.1160                         |
| Largest diff. peak/hole / e Å <sup>-3</sup> | 0.26/-0.40                                        |

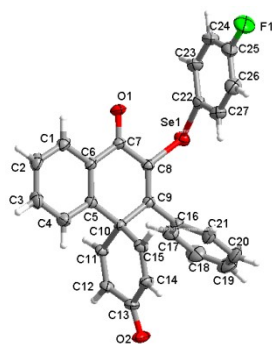

**3af**

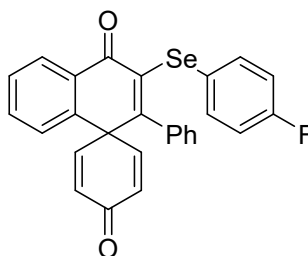

**3af**

Figure S2. X-ray molecular structure of 3af with the probability at 50% level.

## 5. Characterization of compounds 3

### 2'-Phenyl-3'-(phenylselanyl)-4'H-spiro[cyclohexane-1,1'-naphthalene]-2,5-diene-4,4'-dione (3aa)<sup>S3,S4</sup>

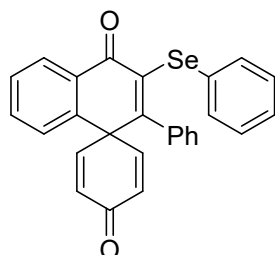

Yellow solid. 76.5 mg, Yield: 82%. mp 205-207 °C. <sup>1</sup>H NMR (400 MHz, CDCl<sub>3</sub>) δ 8.27 (d, *J* = 7.6 Hz, 1H), 7.56 (dt, *J* = 23.7, 7.3 Hz, 2H), 7.33 – 7.10 (m, 9H), 6.94 (d, *J* = 7.1 Hz, 2H), 6.76 (d, *J* = 9.1 Hz, 2H), 6.32 (d, *J* = 9.1 Hz, 2H). <sup>13</sup>C NMR (100 MHz, CDCl<sub>3</sub>) δ 184.7, 180.6, 158.6, 148.5, 138.0, 137.9, 137.2, 133.4, 133.0, 130.7, 130.1, 130.0, 129.2, 129.0, 128.5, 128.1, 127.8, 127.4, 127.2, 52.6. HRMS (ESI) *m/z* calcd for C<sub>27</sub>H<sub>18</sub>NaO<sub>2</sub>Se [M+Na]<sup>+</sup> 477.0364, found 477.0366.

### 2'-Phenyl-3'-(*p*-tolylselanyl)-4'H-spiro[cyclohexane-1,1'-naphthalene]-2,5-diene-4,4'-dione (3ab)

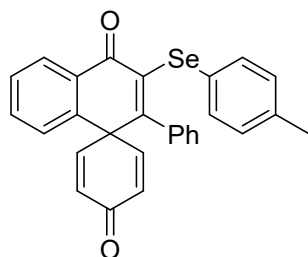

Yellow solid. 71.1 mg, Yield: 76%. mp 191-193 °C. <sup>1</sup>H NMR (400 MHz, CDCl<sub>3</sub>) δ 8.27 (d, *J* = 7.7 Hz, 1H), 7.56 (dt, *J* = 22.0, 7.4 Hz, 2H), 7.31 – 7.16 (m, 6H), 6.95 (t, *J* = 7.1 Hz, 4H), 6.75 (d, *J* = 9.3 Hz, 2H), 6.32 (d, *J* = 9.3 Hz, 2H), 2.30 (s, 3H). <sup>13</sup>C NMR (100 MHz, CDCl<sub>3</sub>) δ 184.7, 180.7, 158.0, 148.5, 138.0, 137.9, 137.4, 137.3, 133.4, 133.3, 130.1, 129.8, 129.1, 128.5, 128.5, 128.0, 127.7, 127.5, 126.8, 52.5, 21.1. HRMS (ESI) *m/z* calcd for C<sub>28</sub>H<sub>20</sub>NaO<sub>2</sub>Se [M+Na]<sup>+</sup> 491.0521, found 491.0523.

### 3'-((4-Ethylphenyl)selanyl)-2'-phenyl-4'H-spiro[cyclohexane-1,1'-naphthalene]-2,5-diene-4,4'-dione (3ac)

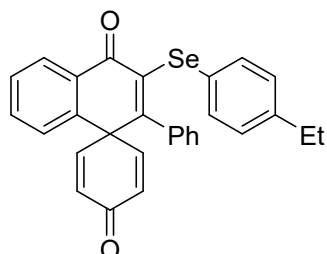

Yellow solid. 78 mg, Yield: 81%. mp 188-189 °C. <sup>1</sup>H NMR (400 MHz, CDCl<sub>3</sub>) δ 8.27 (d, *J* = 7.7 Hz, 1H), 7.55 (dt, *J* = 14.9, 7.2 Hz, 2H), 7.31 – 7.24 (m, 2H), 7.22 (d, *J* = 7.3 Hz, 4H), 6.96 (dd, *J* = 13.8, 7.5 Hz, 4H), 6.75 (d, *J* = 9.4 Hz, 2H), 6.31 (d, *J* = 9.3 Hz, 2H), 2.58 (q, *J* = 7.5 Hz, 2H), 1.21 (t, *J* = 7.5 Hz, 3H). <sup>13</sup>C NMR (100 MHz, CDCl<sub>3</sub>) δ 184.7, 180.7, 157.9, 148.6, 143.6, 138.0, 138.0,

137.5, 133.5, 133.3, 130.1, 130.1, 129.1, 128.6, 128.5, 128.4, 128.1, 127.7, 127.5, 127.0, 52.6, 28.5, 15.5. HRMS (ESI)  $m/z$  calcd for  $C_{29}H_{22}NaO_2Se$   $[M+Na]^+$  505.0677, found 505.0681.

**3'-((4-(Tert-butyl)phenyl)selanyl)-2'-phenyl-4'H-spiro[cyclohexane-1,1'-naphthalene]-2,5-diene-4,4'-dione (3ad)**

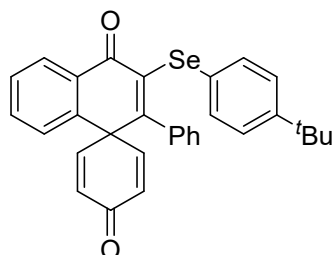

Yellow solid. 61.2 mg, Yield: 60%. mp 171-173 °C.  $^1H$  NMR (400 MHz,  $CDCl_3$ )  $\delta$  8.30 (d,  $J = 7.6$  Hz, 1H), 7.57 (dt,  $J = 19.4, 7.3$  Hz, 2H), 7.31 – 7.11 (m, 9H), 6.91 (d,  $J = 7.6$  Hz, 2H), 6.74 (d,  $J = 9.3$  Hz, 2H), 6.31 (d,  $J = 9.3$  Hz, 2H), 1.29 (s, 9H).  $^{13}C$  NMR (100 MHz,  $CDCl_3$ )  $\delta$  184.8, 180.8, 157.8, 150.4, 148.6, 137.9, 137.5, 133.3, 133.2, 130.1, 130.0, 129.1, 128.5, 128.4, 128.1, 127.7, 127.5, 126.7, 126.1, 52.6, 34.5, 31.3. HRMS (ESI)  $m/z$  calcd for  $C_{31}H_{26}NaO_2Se$   $[M+Na]^+$  533.0990, found 533.0992.

**3'-((4-Methoxyphenyl)selanyl)-2'-phenyl-4'H-spiro[cyclohexane-1,1'-naphthalene]-2,5-diene-4,4'-dione (3ae)<sup>S4</sup>**

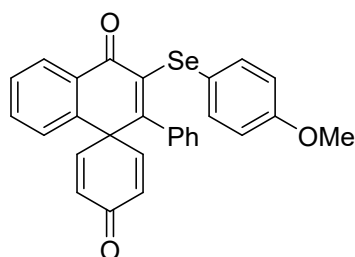

Yellow solid. 61 mg, Yield: 63%. mp 163-165 °C.  $^1H$  NMR (400 MHz,  $CDCl_3$ )  $\delta$  8.26 (d,  $J = 7.5$  Hz, 1H), 7.54 (dt,  $J = 21.9, 7.1$  Hz, 2H), 7.27 – 7.21 (m, 6H), 6.94 (d,  $J = 7.1$  Hz, 2H), 6.73 (d,  $J = 9.3$  Hz, 2H), 6.68 (d,  $J = 7.7$  Hz, 2H), 6.29 (d,  $J = 9.3$  Hz, 2H), 3.76 (s, 3H).  $^{13}C$  NMR (100 MHz,  $CDCl_3$ )  $\delta$  184.8, 180.9, 159.3, 157.3, 148.6, 137.9, 137.9, 137.8, 135.9, 133.3, 130.0, 129.1, 128.5, 128.0, 127.7, 127.6, 120.3, 114.6, 55.3, 52.5.  $^{77}Se$  NMR (114 MHz,  $CDCl_3$ )  $\delta$  349.44. HRMS (ESI)  $m/z$  calcd for  $C_{28}H_{20}NaO_3Se$   $[M+Na]^+$  507.0470, found 507.0472.

**3'-((4-Fluorophenyl)selanyl)-2'-phenyl-4'H-spiro[cyclohexane-1,1'-naphthalene]-2,5-diene-4,4'-dione (3af)<sup>S4</sup>**

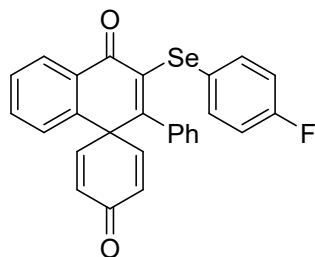

Yellow solid. 68.9 mg, Yield: 73%. mp 169-170 °C.  $^1H$  NMR (400 MHz,  $CDCl_3$ )  $\delta$  8.27 (d,  $J = 7.5$  Hz, 1H), 7.57 (dt,  $J = 14.3, 6.8$  Hz, 2H), 7.29 – 7.24 (m, 6H), 6.94 (d,  $J = 6.9$  Hz, 2H), 6.84 (t,  $J = 7.9$  Hz, 2H), 6.74 (d,  $J = 9.5$  Hz, 2H), 6.32 (d,  $J = 9.6$  Hz, 2H).  $^{13}C$  NMR (100 MHz,  $CDCl_3$ )  $\delta$

184.7, 180.7, 162.4 (d,  $J = 247.6$  Hz), 157.9, 148.4, 138.0, 137.8, 137.5, 135.9 (d,  $J = 8.0$  Hz), 133.5, 130.2, 129.9, 129.2, 128.6, 128.5, 128.1, 127.8, 127.5, 124.8 (d,  $J = 3.4$  Hz), 116.1 (d,  $J = 21.6$  Hz), 52.6.  $^{19}\text{F}$  NMR (376 MHz,  $\text{CDCl}_3$ )  $\delta$  -113.89. HRMS (ESI)  $m/z$  calcd for  $\text{C}_{27}\text{H}_{17}\text{FNaO}_2\text{Se}$   $[\text{M}+\text{Na}]^+$  495.0270, found 4795.0272.

**2'-Phenyl-3'-(*m*-tolylselanyl)-4'H-spiro[cyclohexane-1,1'-naphthalene]-2,5-diene-4,4'-dione (3ag)**

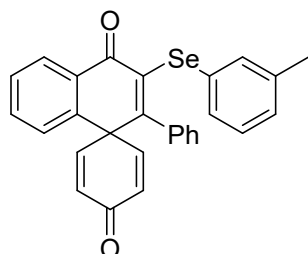

Yellow solid. 73 mg, Yield: 78%. mp 148-149 °C.  $^1\text{H}$  NMR (400 MHz,  $\text{CDCl}_3$ )  $\delta$  8.28 (d,  $J = 7.7$  Hz, 1H), 7.56 (dt,  $J = 22.6, 7.4$  Hz, 2H), 7.32 – 7.24 (m, 2H), 7.20 (t,  $J = 7.5$  Hz, 2H), 7.10 (d,  $J = 7.4$  Hz, 1H), 7.06 – 6.97 (m, 3H), 6.93 (d,  $J = 7.7$  Hz, 2H), 6.76 (d,  $J = 9.6$  Hz, 2H), 6.31 (d,  $J = 9.7$  Hz, 2H), 2.23 (s, 3H).  $^{13}\text{C}$  NMR (100 MHz,  $\text{CDCl}_3$ )  $\delta$  184.7, 180.7, 158.1, 148.5, 138.6, 138.0, 137.9, 137.4, 133.8, 133.4, 130.4, 130.1, 130.0, 129.1, 128.8, 128.5, 128.4, 128.1, 128.1, 127.7, 127.5, 52.6, 21.3. HRMS (ESI)  $m/z$  calcd for  $\text{C}_{28}\text{H}_{20}\text{NaO}_2\text{Se}$   $[\text{M}+\text{Na}]^+$  491.0521, found 491.0523.

**3'-((3-Chlorophenyl)selanyl)-2'-phenyl-4'H-spiro[cyclohexane-1,1'-naphthalene]-2,5-diene-4,4'-dione (3ah)**

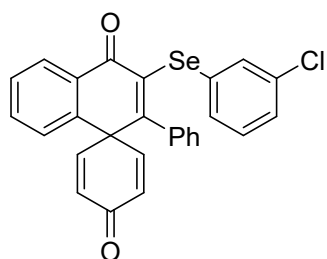

Yellow solid. 68.3 mg, Yield: 70%. mp 160-161 °C.  $^1\text{H}$  NMR (400 MHz,  $\text{CDCl}_3$ )  $\delta$  8.28 (d,  $J = 8.9$  Hz, 1H), 7.58 (dt,  $J = 14.1, 7.3$  Hz, 2H), 7.33 – 7.26 (m, 2H), 7.27 – 7.12 (m, 5H), 7.07 (t,  $J = 8.0$  Hz, 1H), 6.93 (d,  $J = 7.3$  Hz, 2H), 6.75 (d,  $J = 10.0$  Hz, 2H), 6.33 (d,  $J = 10.0$  Hz, 2H).  $^{13}\text{C}$  NMR (100 MHz,  $\text{CDCl}_3$ )  $\delta$  184.6, 180.5, 158.7, 148.3, 138.0, 137.6, 137.0, 134.4, 133.6, 132.8, 132.1, 131.2, 130.2, 129.9, 129.9, 129.2, 128.7, 128.5, 128.1, 127.8, 127.5, 127.4, 52.7.  $^{77}\text{Se}$  NMR (114 MHz,  $\text{CDCl}_3$ )  $\delta$  372.05. HRMS (ESI)  $m/z$  calcd for  $\text{C}_{27}\text{H}_{17}\text{ClNaO}_2\text{Se}$   $[\text{M}+\text{Na}]^+$  510.9975, found 510.9977.

**3'-((3-Bromophenyl)selanyl)-2'-phenyl-4'H-spiro[cyclohexane-1,1'-naphthalene]-2,5-diene-4,4'-dione (3ai)**

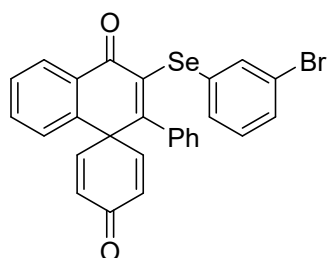



Yellow solid. 72.3 mg, Yield: 68%. mp 163-164 °C. <sup>1</sup>H NMR (400 MHz, CDCl<sub>3</sub>) δ 8.30 (d, *J* = 7.6 Hz, 1H), 7.59 (dt, *J* = 21.8, 7.3 Hz, 2H), 7.34 – 7.29 (m, 4H), 7.22 (t, *J* = 7.8 Hz, 3H), 7.01 (t, *J* = 7.8 Hz, 1H), 6.92 (d, *J* = 7.6 Hz, 2H), 6.75 (d, *J* = 9.8 Hz, 2H), 6.33 (d, *J* = 9.7 Hz, 2H). <sup>13</sup>C NMR (100 MHz, CDCl<sub>3</sub>) δ 184.6, 180.5, 158.5, 148.2, 138.0, 137.6, 137.2, 135.7, 133.6, 132.4, 131.7, 130.4, 130.2, 129.9, 129.2, 128.7, 128.6, 128.1, 127.8, 127.4, 122.6, 52.7. HRMS (ESI) *m/z* calcd for C<sub>27</sub>H<sub>17</sub>BrNaO<sub>2</sub>Se [M+Na]<sup>+</sup> 554.9469, found 554.9471.

**2'-Phenyl-3'-((3-(trifluoromethyl)phenyl)selanyl)-4'H-spiro[cyclohexane-1,1'-naphthalene]-2,5-diene-4,4'-dione (3aj)**

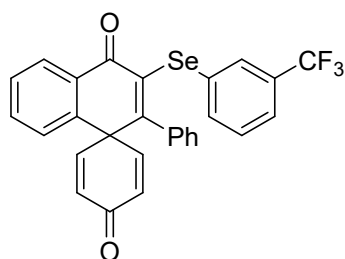

Yellow solid. 52.2 mg, Yield: 50%. mp 170-172 °C. <sup>1</sup>H NMR (400 MHz, CDCl<sub>3</sub>) δ 8.29 (d, *J* = 7.7 Hz, 1H), 7.59 (dt, *J* = 22.9, 7.4 Hz, 2H), 7.50 – 7.39 (m, 3H), 7.31 – 7.17 (m, 5H), 6.90 (d, *J* = 7.5 Hz, 2H), 6.74 (d, *J* = 9.1 Hz, 2H), 6.32 (d, *J* = 9.1 Hz, 2H). <sup>13</sup>C NMR (100 MHz, CDCl<sub>3</sub>) δ 184.6, 180.6, 158.6, 148.2, 138.0, 137.6, 137.1, 136.5, 133.6, 131.6, 131.1 (q, *J* = 32.8 Hz), 130.3, 129.8 (q, *J* = 3.9 Hz), 129.8, 129.2, 129.2, 128.8, 128.5, 128.1, 127.8, 127.3, 124.07 (q, *J* = 3.7 Hz), 123.6 (q, *J* = 273.3 Hz), 52.7. <sup>19</sup>F NMR (376 MHz, CDCl<sub>3</sub>) δ -62.73. HRMS (ESI) *m/z* calcd for C<sub>28</sub>H<sub>17</sub>F<sub>3</sub>NaO<sub>2</sub>Se [M+Na]<sup>+</sup> 545.0238, found 545.0239.

**2'-Phenyl-3'-(*o*-tolylselanyl)-4'H-spiro[cyclohexane-1,1'-naphthalene]-2,5-diene-4,4'-dione (3ak)**

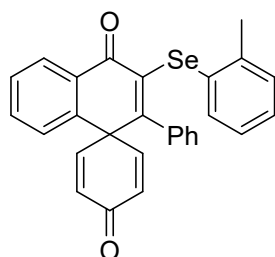

Yellow solid. 49.6 mg, Yield: 53%. mp 159-161 °C. <sup>1</sup>H NMR (400 MHz, CDCl<sub>3</sub>) δ 8.28 (d, *J* = 7.7 Hz, 1H), 7.57 (dt, *J* = 23.2, 7.4 Hz, 2H), 7.30 (d, *J* = 8.1 Hz, 2H), 7.25 (d, *J* = 7.2 Hz, 1H), 7.18 (dd, *J* = 13.1, 7.2 Hz, 3H), 7.12 – 7.06 (m, 2H), 6.95 – 6.90 (m, 3H), 6.76 (d, *J* = 9.5 Hz, 2H), 6.32 (d, *J* = 9.5 Hz, 2H), 2.26 (s, 3H). <sup>13</sup>C NMR (100 MHz, CDCl<sub>3</sub>) δ 184.7, 180.6, 158.0, 148.5, 139.6, 138.0, 137.8, 137.2, 133.4, 133.2, 131.9, 130.1, 130.0, 129.9, 129.1, 128.5, 128.5, 128.1, 127.7, 127.4, 127.2, 126.4, 52.7, 22.5. HRMS (ESI) *m/z* calcd for C<sub>28</sub>H<sub>20</sub>NaO<sub>2</sub>Se [M+Na]<sup>+</sup> 491.0521, found 491.0524.

**3'-((2-Methoxyphenyl)selanyl)-2'-phenyl-4'H-spiro[cyclohexane-1,1'-naphthalene]-2,5-diene-4,4'-dione (3al)**

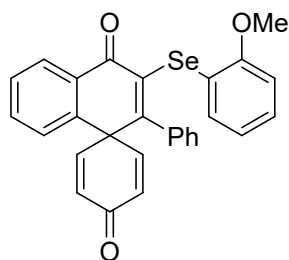

Yellow solid. 43.6 mg, Yield: 45%, mp 147-148 °C.  $^1\text{H}$  NMR (400 MHz,  $\text{CDCl}_3$ )  $\delta$  8.28 (d,  $J = 7.4$  Hz, 1H), 7.57 (dd,  $J = 15.5, 7.3$  Hz, 2H), 7.35 – 7.12 (m, 5H), 7.06 (d,  $J = 7.2$  Hz, 1H), 6.97 (d,  $J = 6.9$  Hz, 2H), 6.76 (t,  $J = 11.0$  Hz, 4H), 6.33 (d,  $J = 9.4$  Hz, 2H), 3.75 (s, 3H).  $^{13}\text{C}$  NMR (100 MHz,  $\text{CDCl}_3$ )  $\delta$  184.8, 180.4, 158.2, 157.3, 148.7, 137.9, 137.9, 136.0, 133.3, 131.9, 130.1, 129.1, 128.6, 128.5, 128.2, 128.0, 127.7, 127.2, 121.3, 120.3, 110.6, 55.6, 52.61. HRMS (ESI)  $m/z$  calcd for  $\text{C}_{28}\text{H}_{20}\text{NaO}_3\text{Se}$   $[\text{M}+\text{Na}]^+$  507.0470, found 507.0467.

**3'-(Naphthalen-1-ylselanyl)-2'-phenyl-4'H-spiro[cyclohexane-1,1'-naphthalene]-2,5-diene-4,4'-dione (3am)**

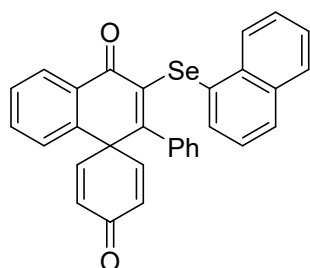

Yellow solid. 41.3 mg, Yield: 41%. mp 157-158 °C.  $^1\text{H}$  NMR (400 MHz,  $\text{CDCl}_3$ )  $\delta$  8.31 (d,  $J = 7.5$  Hz, 1H), 8.06 (d,  $J = 7.6$  Hz, 1H), 7.77 (d,  $J = 7.4$  Hz, 1H), 7.69 (d,  $J = 8.2$  Hz, 1H), 7.63 – 7.51 (m, 2H), 7.51 – 7.41 (m, 2H), 7.39 (d,  $J = 7.1$  Hz, 1H), 7.25 (d,  $J = 7.5$  Hz, 1H), 7.15 – 7.03 (m, 2H), 6.97 (t,  $J = 7.4$  Hz, 2H), 6.63 (t,  $J = 8.8$  Hz, 4H), 6.22 (d,  $J = 9.2$  Hz, 2H).  $^{13}\text{C}$  NMR (100 MHz,  $\text{CDCl}_3$ )  $\delta$  184.8, 181.1, 156.6, 148.6, 138.0, 137.4, 137.2, 133.8, 133.8, 133.6, 133.4, 129.9, 129.8, 129.4, 129.1, 128.7, 128.6, 128.5, 128.2, 128.1, 127.7, 127.5, 127.1, 126.4, 126.1, 125.7, 52.9. HRMS (ESI)  $m/z$  calcd for  $\text{C}_{31}\text{H}_{20}\text{NaO}_2\text{Se}$   $[\text{M}+\text{Na}]^+$  527.0521, found 527.0522.

**3'-((2-Methoxypyridin-3-yl)selanyl)-2'-phenyl-4'H-spiro[cyclohexane-1,1'-naphthalene]-2,5-diene-4,4'-dione (3an)**

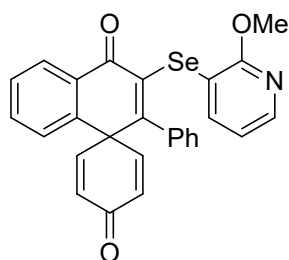

Yellow solid. 48.5 mg, Yield: 50%. mp 161-162 °C.  $^1\text{H}$  NMR (400 MHz,  $\text{CDCl}_3$ )  $\delta$  8.29 (d,  $J = 7.6$  Hz, 1H), 7.97 (d,  $J = 3.3$  Hz, 1H), 7.59 (dd,  $J = 15.4, 7.5$  Hz, 2H), 7.39 – 7.13 (m, 5H), 6.95 (d,  $J = 7.2$  Hz, 2H), 6.75 (d,  $J = 9.4$  Hz, 2H), 6.66 (t,  $J = 5.7$  Hz, 1H), 6.33 (d,  $J = 9.4$  Hz, 2H), 3.87 (s, 3H).  $^{13}\text{C}$  NMR (100 MHz,  $\text{CDCl}_3$ )  $\delta$  184.7, 180.3, 161.3, 157.9, 148.4, 145.2, 140.8, 138.0, 137.5, 135.3, 133.5, 130.2, 129.8, 129.2, 128.7, 128.5, 128.1, 127.8, 127.2, 117.5, 115.0, 53.8, 52.7. HRMS (ESI)  $m/z$  calcd for  $\text{C}_{27}\text{H}_{19}\text{NNaO}_3\text{Se}$   $[\text{M}+\text{Na}]^+$  508.0422, found 508.0423.

**3'-(Phenylselanyl)-2'-(*p*-tolyl)-4'H-spiro[cyclohexane-1,1'-naphthalene]-2,5-diene-4,4'-dione (3ba)<sup>S3</sup>**

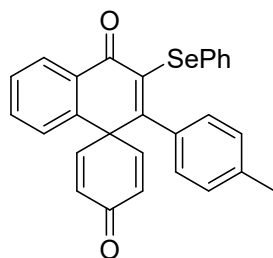

Yellow solid. 66.5 mg, Yield: 71%. mp 159-160 °C. <sup>1</sup>H NMR (400 MHz, CDCl<sub>3</sub>) δ 8.26 (d, *J* = 7.7 Hz, 1H), 7.56 (dt, *J* = 24.2, 7.4 Hz, 2H), 7.30 (t, *J* = 7.8 Hz, 3H), 7.21 – 7.13 (m, 3H), 7.03 (d, *J* = 7.7 Hz, 2H), 6.85 (d, *J* = 7.7 Hz, 2H), 6.76 (d, *J* = 9.5 Hz, 2H), 6.33 (d, *J* = 9.5 Hz, 2H), 2.34 (s, 3H). <sup>13</sup>C NMR (100 MHz, CDCl<sub>3</sub>) δ 184.8, 180.5, 158.8, 148.6, 138.4, 138.0, 137.1, 135.3, 133.3, 132.9, 130.8, 130.1, 129.1, 128.9, 128.5, 128.5, 128.1, 127.3, 127.1, 52.7, 21.3. <sup>77</sup>Se NMR (114 MHz, CDCl<sub>3</sub>) δ 359.52. HRMS (ESI) *m/z* calcd for C<sub>28</sub>H<sub>20</sub>NaO<sub>2</sub>Se [M+Na]<sup>+</sup> 491.0521, found 491.0523.

**2'-(4-Methoxyphenyl)-3'-(phenylselanyl)-4'H-spiro[cyclohexane-1,1'-naphthalene]-2,5-diene-4,4'-dione (3ca)<sup>S3</sup>**

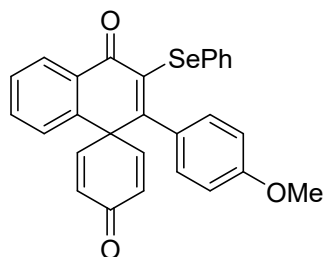

Yellow solid. 64.9 mg, Yield: 67%. mp 163-164 °C. <sup>1</sup>H NMR (400 MHz, CDCl<sub>3</sub>) δ 8.27 (d, *J* = 7.8 Hz, 1H), 7.56 (dt, *J* = 14.2, 7.9 Hz, 2H), 7.30 – 7.28 (m, 3H), 7.16 (dt, *J* = 14.1, 4.7 Hz, 3H), 6.88 (d, *J* = 8.6 Hz, 2H), 6.73 (dd, *J* = 9.2, 5.7 Hz, 4H), 6.33 (d, *J* = 9.9 Hz, 2H), 3.80 (s, 3H). <sup>13</sup>C NMR (100 MHz, CDCl<sub>3</sub>) δ 184.8, 180.7, 159.6, 158.2, 148.7, 138.0, 137.6, 133.3, 133.0, 130.9, 130.6, 130.1, 129.1, 128.9, 128.8, 128.5, 128.0, 127.2, 113.2, 55.2, 52.9. HRMS (ESI) *m/z* calcd for C<sub>28</sub>H<sub>20</sub>NaO<sub>3</sub>Se [M+Na]<sup>+</sup> 507.0470, found 507.0473.

**2'-([1,1'-Biphenyl]-4-yl)-3'-(phenylselanyl)-4'H-spiro[cyclohexane-1,1'-naphthalene]-2,5-diene-4,4'-dione (3da)**

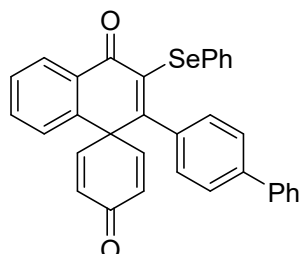

Yellow solid. 54 mg, Yield: 51%. mp 184-185 °C. <sup>1</sup>H NMR (400 MHz, CDCl<sub>3</sub>) δ 8.31 (d, *J* = 7.7 Hz, 1H), 7.66 – 7.51 (m, 4H), 7.47 (t, *J* = 7.4 Hz, 2H), 7.40 (d, *J* = 7.4 Hz, 3H), 7.34 – 7.09 (m, 6H), 6.99 (d, *J* = 7.8 Hz, 2H), 6.78 (d, *J* = 9.4 Hz, 2H), 6.35 (d, *J* = 9.4 Hz, 2H). <sup>13</sup>C NMR (100 MHz, CDCl<sub>3</sub>) δ 184.8, 180.8, 157.7, 148.6, 141.1, 140.2, 138.0, 137.8, 136.9, 133.4, 133.3, 130.6, 130.2,

130.0, 129.2, 128.9, 128.8, 128.6, 128.1, 127.9, 127.7, 127.3, 127.1, 126.4, 52.7. HRMS (ESI)  $m/z$  calcd for  $C_{33}H_{22}NaO_2Se$   $[M+Na]^+$  553.0677, found 553.0681.

**2'-(4-Fluorophenyl)-3'-(phenylselanyl)-4'H-spiro[cyclohexane-1,1'-naphthalene]-2,5-diene-4,4'-dione (3ea)**

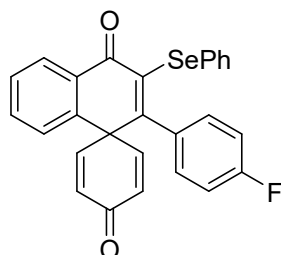

Yellow solid. 65.1 mg, Yield: 69%. mp 178-179 °C.  $^1H$  NMR (400 MHz,  $CDCl_3$ )  $\delta$  8.29 (d,  $J = 7.7$  Hz, 1H), 7.58 (dt,  $J = 21.7, 7.4$  Hz, 2H), 7.29 – 7.24 (m, 3H), 7.20 – 7.12 (m, 3H), 6.88 (d,  $J = 6.7$  Hz, 4H), 6.72 (d,  $J = 9.1$  Hz, 2H), 6.33 (d,  $J = 9.1$  Hz, 2H).  $^{13}C$  NMR (100 MHz,  $CDCl_3$ )  $\delta$  184.5, 180.7, 162.4 (d,  $J = 249.1$  Hz), 156.8, 148.4, 138.3, 137.9, 133.8 (d,  $J = 3.6$  Hz), 133.5, 133.3, 130.5, 130.2, 129.8, 129.5 (d,  $J = 8.3$  Hz), 129.2, 129.0, 128.6, 128.1, 127.4, 114.9 (d,  $J = 21.8$  Hz), 52.6.  $^{19}F$  NMR (376 MHz,  $CDCl_3$ )  $\delta$  -112.26. HRMS (ESI)  $m/z$  calcd for  $C_{27}H_{17}FNaO_2Se$   $[M+Na]^+$  495.0270, found 4795.0271.

**2'-(4-Chlorophenyl)-3'-(phenylselanyl)-4'H-spiro[cyclohexane-1,1'-naphthalene]-2,5-diene-4,4'-dione (3fa)**

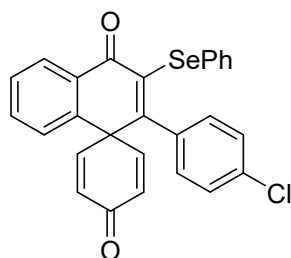

Yellow solid. 60.5 mg, Yield: 62%. mp 174-175 °C.  $^1H$  NMR (400 MHz,  $CDCl_3$ )  $\delta$  8.30 (d,  $J = 7.7$  Hz, 1H), 7.58 (dt,  $J = 21.0, 7.4$  Hz, 2H), 7.33 – 7.17 (m, 4H), 7.15 (d,  $J = 8.0$  Hz, 4H), 6.83 (d,  $J = 7.9$  Hz, 2H), 6.71 (d,  $J = 9.4$  Hz, 2H), 6.33 (d,  $J = 9.4$  Hz, 2H).  $^{13}C$  NMR (100 MHz,  $CDCl_3$ )  $\delta$  184.5, 180.7, 156.3, 148.2, 138.2, 137.8, 136.1, 134.5, 133.5, 133.4, 130.3, 130.3, 129.8, 129.2, 129.0, 128.9, 128.6, 128.1, 128.0, 127.4, 52.5. HRMS (ESI)  $m/z$  calcd for  $C_{27}H_{17}ClNaO_2Se$   $[M+Na]^+$  510.9975, found 510.9976.

**2'-(4-Bromophenyl)-3'-(phenylselanyl)-4'H-spiro[cyclohexane-1,1'-naphthalene]-2,5-diene-4,4'-dione (3ga)**

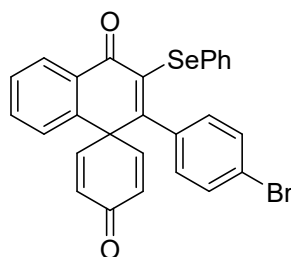

Yellow solid. 68.1 mg, Yield: 64%. mp 169-171 °C.  $^1H$  NMR (400 MHz,  $CDCl_3$ )  $\delta$  8.30 (d,  $J = 7.6$  Hz, 1H), 7.58 (dt,  $J = 20.6, 7.2$  Hz, 2H), 7.31 – 7.12 (m, 8H), 6.77 (d,  $J = 7.8$  Hz, 2H), 6.71 (d,  $J =$

9.3 Hz, 2H), 6.33 (d,  $J = 9.4$  Hz, 2H).  $^{13}\text{C}$  NMR (100 MHz,  $\text{CDCl}_3$ )  $\delta$  184.47 (s), 180.7, 156.2, 148.2, 138.2, 137.8, 136.6, 133.5, 133.5, 131.0, 130.3, 129.8, 129.2, 129.2, 129.0, 128.6, 128.1, 127.5, 122.8, 52.4. HRMS (ESI)  $m/z$  calcd for  $\text{C}_{27}\text{H}_{17}\text{BrNaO}_2\text{Se}$   $[\text{M}+\text{Na}]^+$  554.9469, found 554.9472.

**4-(4,4'-Dioxo-3'-(phenylselanyl)-4'H-spiro[cyclohexane-1,1'-naphthalene]-2,5-dien-2'-yl)benzotrile (3ha)**<sup>S3</sup>

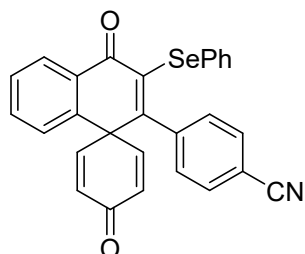

Yellow solid. 54.6 mg, Yield: 57%. mp 180-182 °C.  $^1\text{H}$  NMR (400 MHz,  $\text{CDCl}_3$ )  $\delta$  8.31 (d,  $J = 7.6$  Hz, 1H), 7.60 (dt,  $J = 21.0, 7.4$  Hz, 2H), 7.44 (d,  $J = 7.6$  Hz, 2H), 7.28 (d,  $J = 5.9$  Hz, 1H), 7.24 – 7.11 (m, 5H), 6.99 (d,  $J = 7.6$  Hz, 2H), 6.71 (d,  $J = 9.1$  Hz, 2H), 6.33 (d,  $J = 9.2$  Hz, 2H).  $^{13}\text{C}$  NMR (100 MHz,  $\text{CDCl}_3$ )  $\delta$  184.1, 180.5, 154.9, 147.8, 141.8, 138.6, 137.7, 133.8, 133.6, 131.5, 130.5, 130.1, 129.5, 129.4, 129.2, 128.6, 128.6, 128.1, 127.7, 118.1, 112.2, 52.2. HRMS (ESI)  $m/z$  calcd for  $\text{C}_{28}\text{H}_{17}\text{NNaO}_2\text{Se}$   $[\text{M}+\text{Na}]^+$  502.0317, found 502.0320.

**3'-(Phenylselanyl)-2'-(*m*-tolyl)-4'H-spiro[cyclohexane-1,1'-naphthalene]-2,5-diene-4,4'-dione (3ia)**

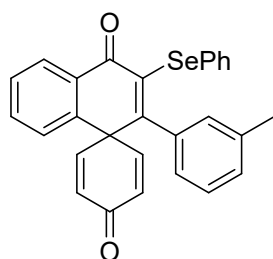

Yellow solid. 73 mg, Yield: 78%. mp 167-169 °C.  $^1\text{H}$  NMR (400 MHz,  $\text{CDCl}_3$ )  $\delta$  8.27 (d,  $J = 7.6$  Hz, 1H), 7.56 (dt,  $J = 23.1, 7.2$  Hz, 2H), 7.29 (d,  $J = 6.3$  Hz, 3H), 7.18 – 7.07 (m, 5H), 6.76 (t,  $J = 8.5$  Hz, 3H), 6.67 (s, 1H), 6.32 (t,  $J = 10.3$  Hz, 2H), 2.25 (s, 3H).  $^{13}\text{C}$  NMR (100 MHz,  $\text{CDCl}_3$ )  $\delta$  184.8, 180.7, 158.7, 148.6, 138.0, 137.9, 137.3, 137.1, 133.4, 133.1, 130.7, 130.0, 129.3, 129.1, 128.9, 128.5, 128.1, 128.0, 127.7, 127.2, 124.5, 52.6, 21.5. HRMS (ESI)  $m/z$  calcd for  $\text{C}_{28}\text{H}_{20}\text{NaO}_2\text{Se}$   $[\text{M}+\text{Na}]^+$  491.0521, found 491.0522.

**2'-(3-Chlorophenyl)-3'-(phenylselanyl)-4'H-spiro[cyclohexane-1,1'-naphthalene]-2,5-diene-4,4'-dione (3ja)**

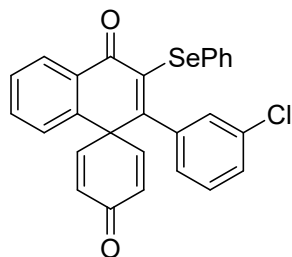

Yellow solid. 60.5 mg, Yield: 62%. mp 171-173 °C.  $^1\text{H}$  NMR (400 MHz,  $\text{CDCl}_3$ )  $\delta$  8.30 (d,  $J = 7.6$

Hz, 1H), 7.58 (dt,  $J = 21.2, 7.0$  Hz, 2H), 7.33 – 7.18 (m, 5H), 7.20 – 7.07 (m, 3H), 6.85 (s, 1H), 6.81 (d,  $J = 7.6$  Hz, 1H), 6.72 (t,  $J = 7.7$  Hz, 2H), 6.34 (dd,  $J = 17.6, 9.7$  Hz, 2H).  $^{13}\text{C}$  NMR (100 MHz,  $\text{CDCl}_3$ )  $\delta$  184.5, 180.7, 155.9, 148.3, 148.0, 139.2, 138.3, 137.8, 133.7, 133.6, 130.4, 130.2, 130.1, 129.8, 129.3, 129.1, 129.1, 128.6, 128.6, 128.1, 127.8, 127.6, 125.8, 52.4. HRMS (ESI)  $m/z$  calcd for  $\text{C}_{27}\text{H}_{17}\text{ClNaO}_2\text{Se}$   $[\text{M}+\text{Na}]^+$  510.9975, found 510.9974.

**7'-Methyl-2'-phenyl-3'-(phenylselanyl)-4'H-spiro[cyclohexane-1,1'-naphthalene]-2,5-diene-4,4'-dione (3ka)<sup>S3</sup>**

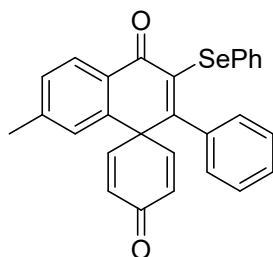

Yellow solid. 65.5 mg, Yield: 70%. mp 158-159 °C.  $^1\text{H}$  NMR (400 MHz,  $\text{CDCl}_3$ )  $\delta$  8.17 (d,  $J = 7.6$  Hz, 1H), 7.34 (d,  $J = 7.6$  Hz, 1H), 7.31 – 7.10 (m, 8H), 7.05 (s, 1H), 6.93 (d,  $J = 5.9$  Hz, 2H), 6.75 (d,  $J = 9.3$  Hz, 2H), 6.32 (d,  $J = 9.3$  Hz, 2H), 2.40 (s, 3H).  $^{13}\text{C}$  NMR (100 MHz,  $\text{CDCl}_3$ )  $\delta$  184.9, 180.4, 158.2, 148.7, 144.5, 138.1, 137.9, 137.3, 132.9, 130.8, 130.3, 130.1, 129.0, 128.6, 128.5, 128.2, 127.7, 127.5, 127.1, 52.6, 21.8. HRMS (ESI)  $m/z$  calcd for  $\text{C}_{28}\text{H}_{20}\text{NaO}_2\text{Se}$   $[\text{M}+\text{Na}]^+$  491.0521, found 491.0520.

**7'-Chloro-2'-phenyl-3'-(phenylselanyl)-4'H-spiro[cyclohexane-1,1'-naphthalene]-2,5-diene-4,4'-dione (3la)**

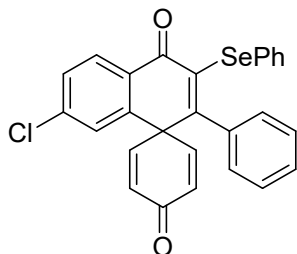

Yellow solid. 70.3 mg, Yield: 72%. mp 151-153 °C.  $^1\text{H}$  NMR (400 MHz,  $\text{CDCl}_3$ )  $\delta$  8.21 (d,  $J = 7.4$  Hz, 1H), 7.50 (d,  $J = 8.1$  Hz, 1H), 7.34 – 7.10 (m, 9H), 6.93 (d,  $J = 5.5$  Hz, 2H), 6.74 (d,  $J = 9.0$  Hz, 2H), 6.35 (d,  $J = 9.0$  Hz, 2H).  $^{13}\text{C}$  NMR (100 MHz,  $\text{CDCl}_3$ )  $\delta$  184.3, 179.8, 158.2, 147.6, 140.1, 139.8, 137.7, 137.2, 133.1, 130.6, 130.5, 130.2, 129.8, 129.0, 128.7, 128.4, 128.0, 127.8, 127.4, 127.4, 52.2. HRMS (ESI)  $m/z$  calcd for  $\text{C}_{27}\text{H}_{17}\text{ClNaO}_2\text{Se}$   $[\text{M}+\text{Na}]^+$  510.9975, found 510.9975.

**6'-Fluoro-2'-phenyl-3'-(phenylselanyl)-4'H-spiro[cyclohexane-1,1'-naphthalene]-2,5-diene-4,4'-dione (3ma)<sup>S3</sup>**

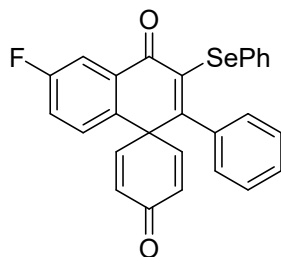

Yellow solid. 64.2 mg, Yield: 68%. mp 161-162 °C.  $^1\text{H}$  NMR (400 MHz,  $\text{CDCl}_3$ )  $\delta$  8.30 (s, 1H),

7.35 – 7.10 (m, 9H), 6.97 – 6.92 (m, 3H), 6.75 (d,  $J = 9.0$  Hz, 2H), 6.34 (d,  $J = 9.0$  Hz, 2H).  $^{13}\text{C}$  NMR (100 MHz,  $\text{CDCl}_3$ )  $\delta$  184.3, 179.5, 165.6 (d,  $J = 256.9$  Hz), 158.3, 147.8, 141.1 (d,  $J = 8.3$  Hz), 137.8, 137.2, 133.1, 131.7 (d,  $J = 9.5$  Hz), 130.5, 130.4, 129.0, 128.6, 127.8, 127.4, 127.3, 126.6 (d,  $J = 2.4$  Hz), 117.2 (d,  $J = 22.1$  Hz), 114.7 (d,  $J = 23.3$  Hz), 52.4.  $^{19}\text{F}$  NMR (376 MHz,  $\text{CDCl}_3$ )  $\delta$  -103.05. HRMS (ESI)  $m/z$  calcd for  $\text{C}_{27}\text{H}_{17}\text{FNaO}_2\text{Se}$   $[\text{M}+\text{Na}]^+$  495.0270, found 4795.0272.

**6'-Chloro-2'-phenyl-3'-(phenylselanyl)-4'H-spiro[cyclohexane-1,1'-naphthalene]-2,5-diene-4,4'-dione (3na)**

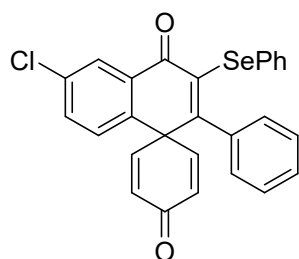

Yellow solid. 63.4 mg, Yield: 65%. mp 157-158 °C.  $^1\text{H}$  NMR (400 MHz,  $\text{CDCl}_3$ )  $\delta$  8.23 (s, 1H), 7.54 (d,  $J = 8.3$  Hz, 1H), 7.33 – 7.12 (m, 9H), 6.94 (d,  $J = 6.9$  Hz, 2H), 6.72 (d,  $J = 9.7$  Hz, 2H), 6.33 (d,  $J = 9.7$  Hz, 2H).  $^{13}\text{C}$  NMR (100 MHz,  $\text{CDCl}_3$ )  $\delta$  184.4, 179.5, 158.7, 147.8, 137.7, 137.1, 136.3, 135.7, 133.5, 133.2, 131.3, 130.4, 129.8, 129.1, 128.7, 128.2, 127.9, 127.4, 127.4, 52.2. HRMS (ESI)  $m/z$  calcd for  $\text{C}_{27}\text{H}_{17}\text{ClNaO}_2\text{Se}$   $[\text{M}+\text{Na}]^+$  510.9975, found 510.9978.

## 6. References

[S1] (a) *Green Chem.*, 2019, **21**, 3547. (b) *Adv. Synth. Catal.*, 2020, **362**, 3485.

[S2] (a) *Org. Lett.*, 2018, **20**, 2988. (b) *Org. Lett.*, 2021, **23**, 2548.

[S3] *J. Org. Chem.*, 2021, **86**, 17071.

[S4] *J. Org. Chem.*, 2022, **87**, 4273.

## 7. Copies of the $^1\text{H}$ , $^{13}\text{C}$ , $^{19}\text{F}$ and $^{77}\text{Se}$ NMR Spectra

### $^1\text{H}$ NMR spectrum of **3aa**

eq-1

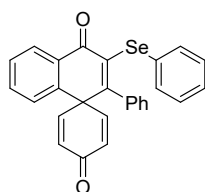

$^1\text{H}$  NMR (400MHz,  $\text{CDCl}_3$ )

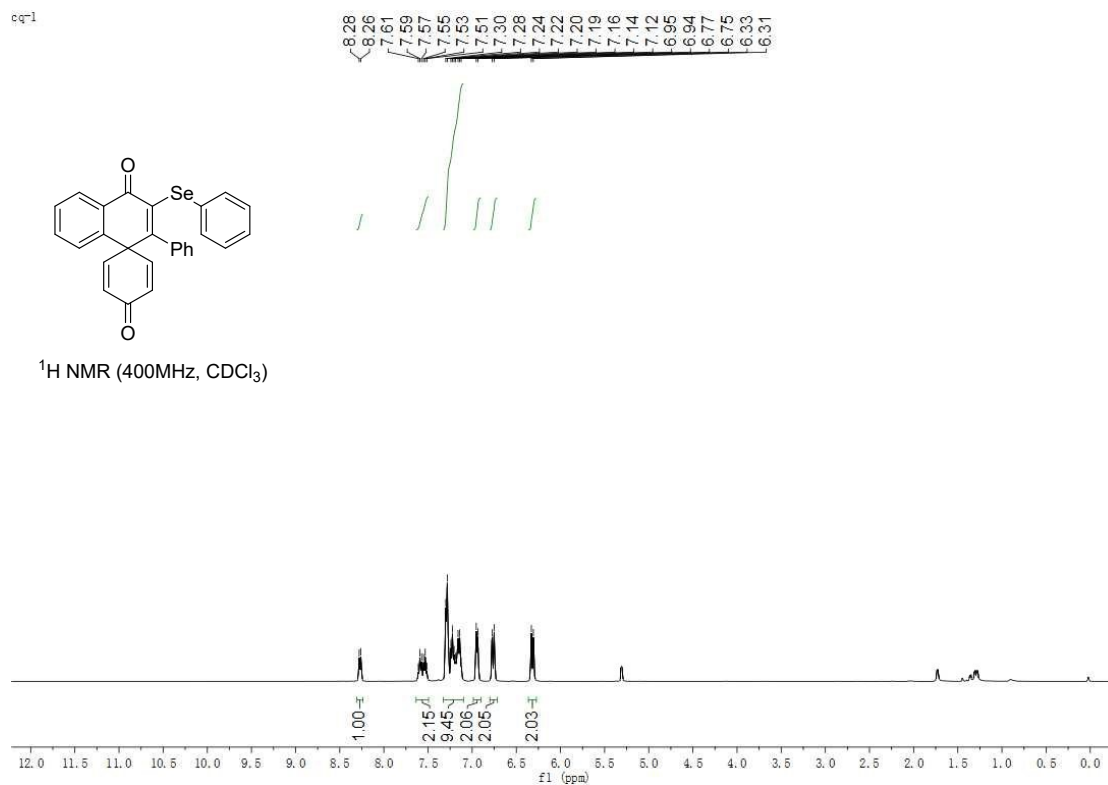

### $^{13}\text{C}$ NMR spectrum of **3aa**

eq-1-5

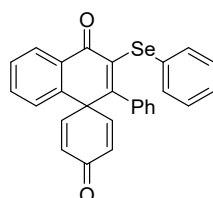

$^{13}\text{C}$  NMR (100MHz,  $\text{CDCl}_3$ )

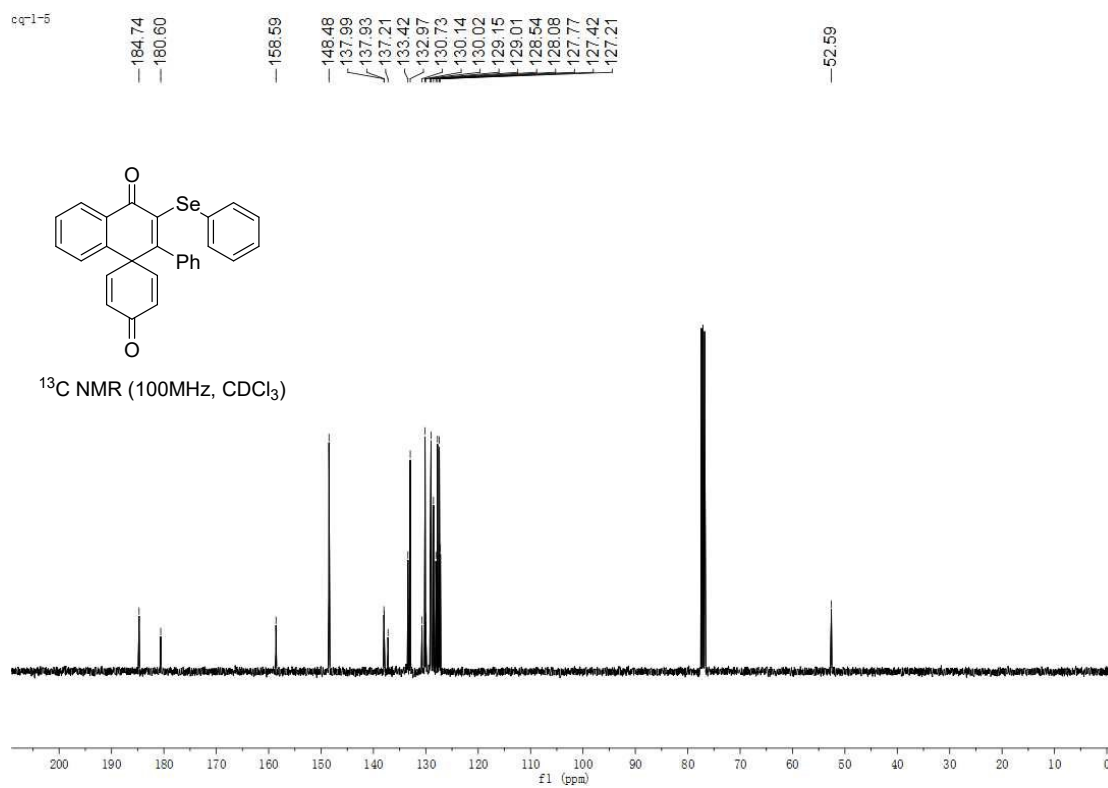



### <sup>1</sup>H NMR spectrum of **3ab**

cq-2

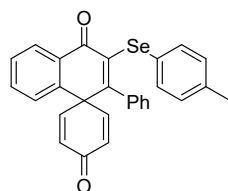

<sup>1</sup>H NMR (400MHz, CDCl<sub>3</sub>)

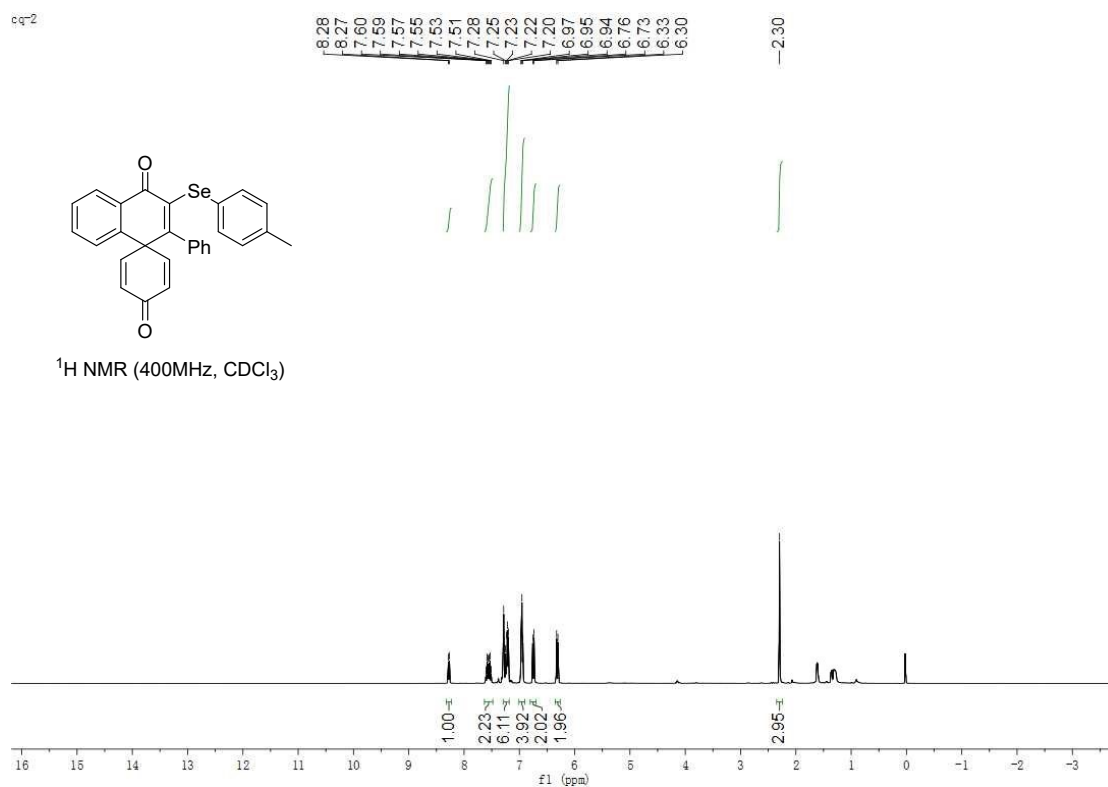

### <sup>13</sup>C NMR spectrum of **3ab**

cq-2

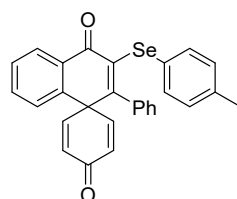

<sup>13</sup>C NMR (100MHz, CDCl<sub>3</sub>)

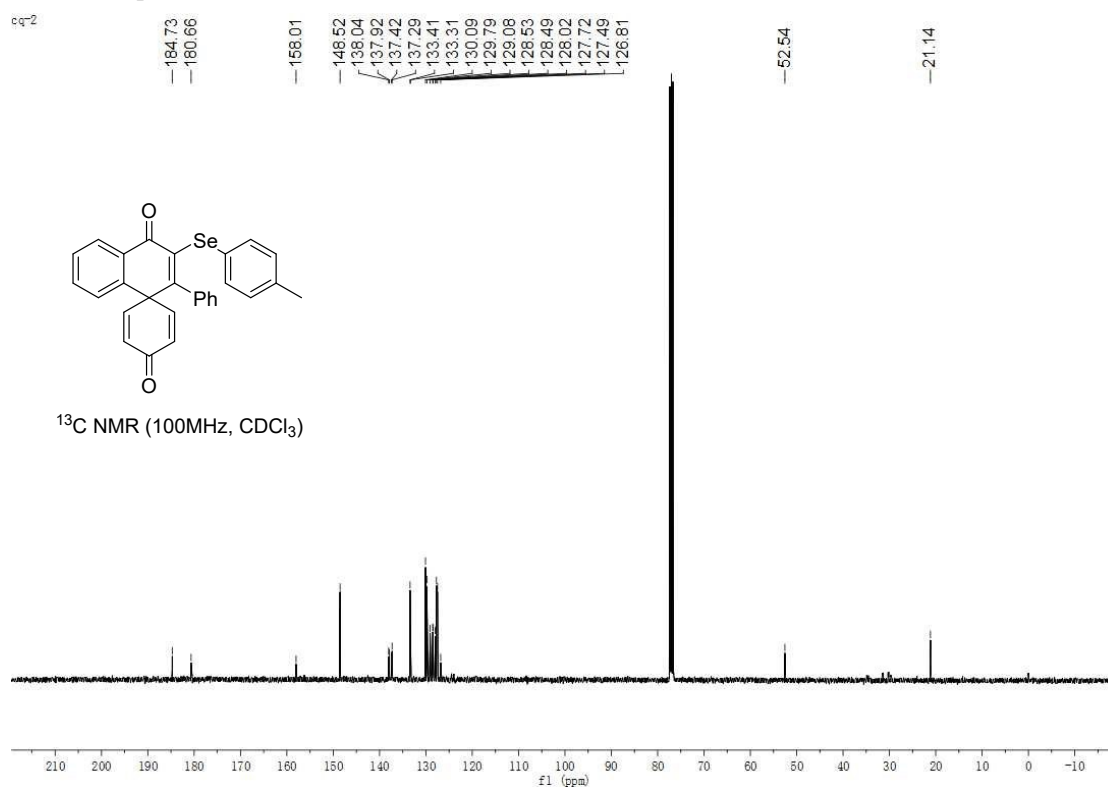

<sup>1</sup>H NMR spectrum of **3ac**

ppm

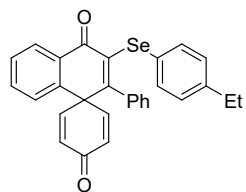

<sup>1</sup>H NMR (400MHz, CDCl<sub>3</sub>)

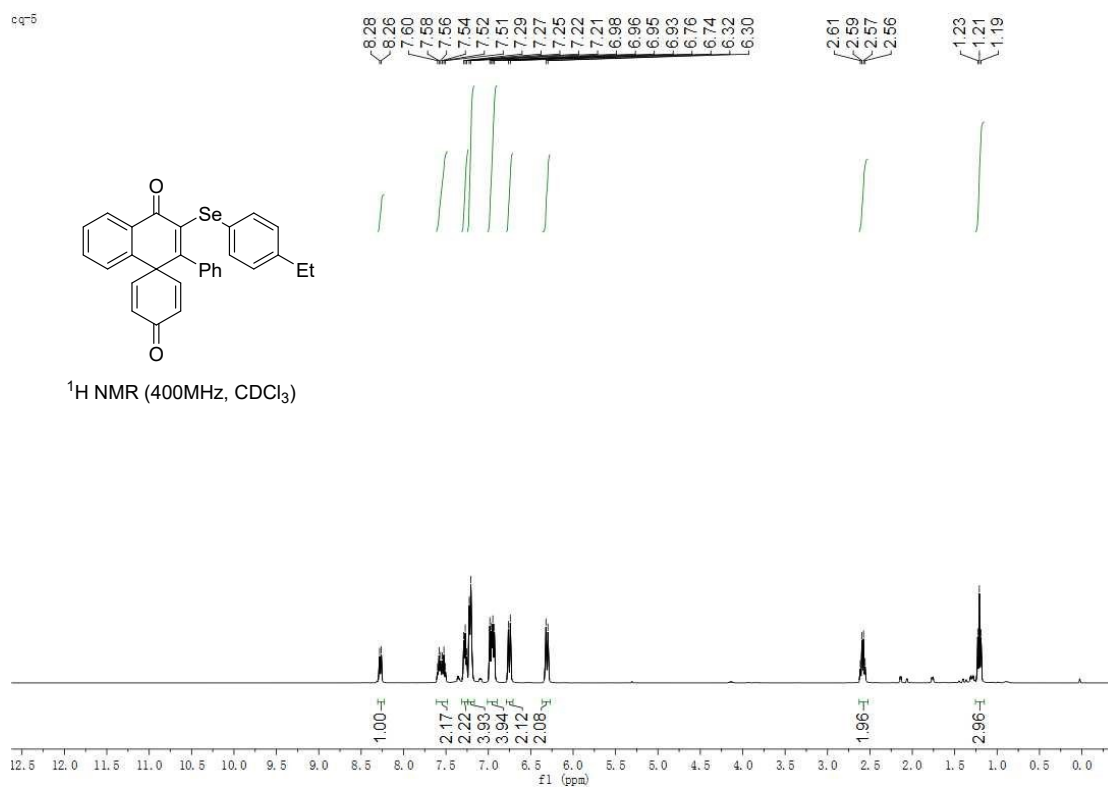

<sup>13</sup>C NMR spectrum of **3ac**

ppm

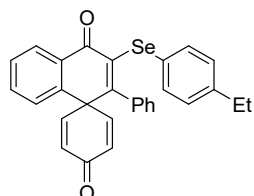

<sup>13</sup>C NMR (100MHz, CDCl<sub>3</sub>)

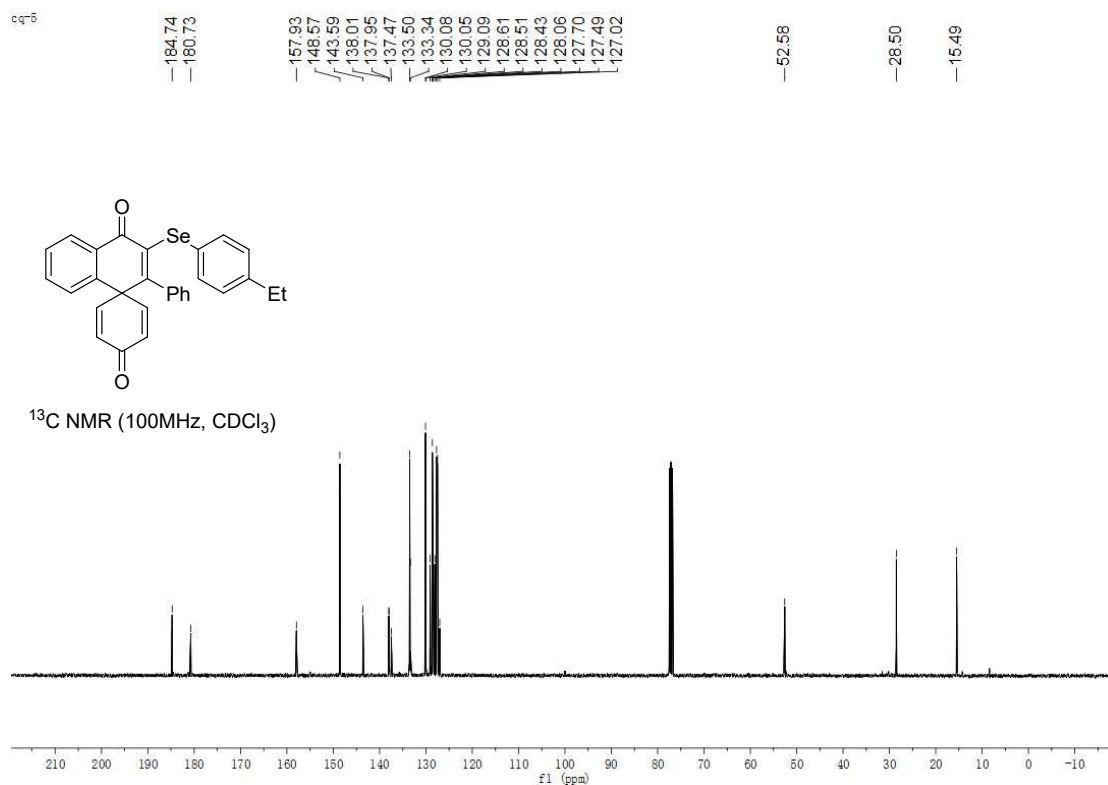

### <sup>1</sup>H NMR spectrum of **3ad**

CQ-8-4

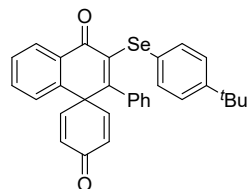

<sup>1</sup>H NMR (400MHz, CDCl<sub>3</sub>)

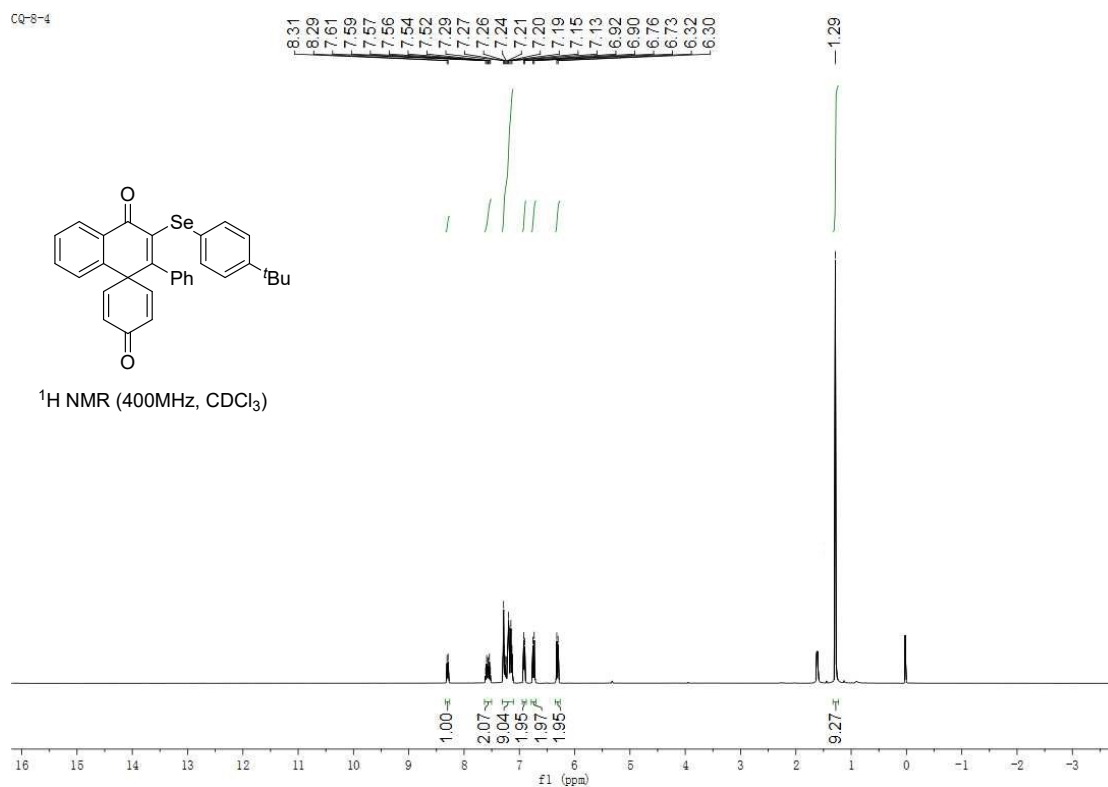

### <sup>13</sup>C NMR spectrum of **3ad**

CQ-8-4

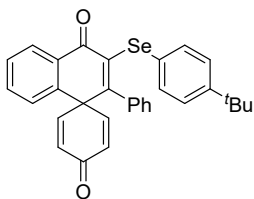

<sup>13</sup>C NMR (100MHz, CDCl<sub>3</sub>)

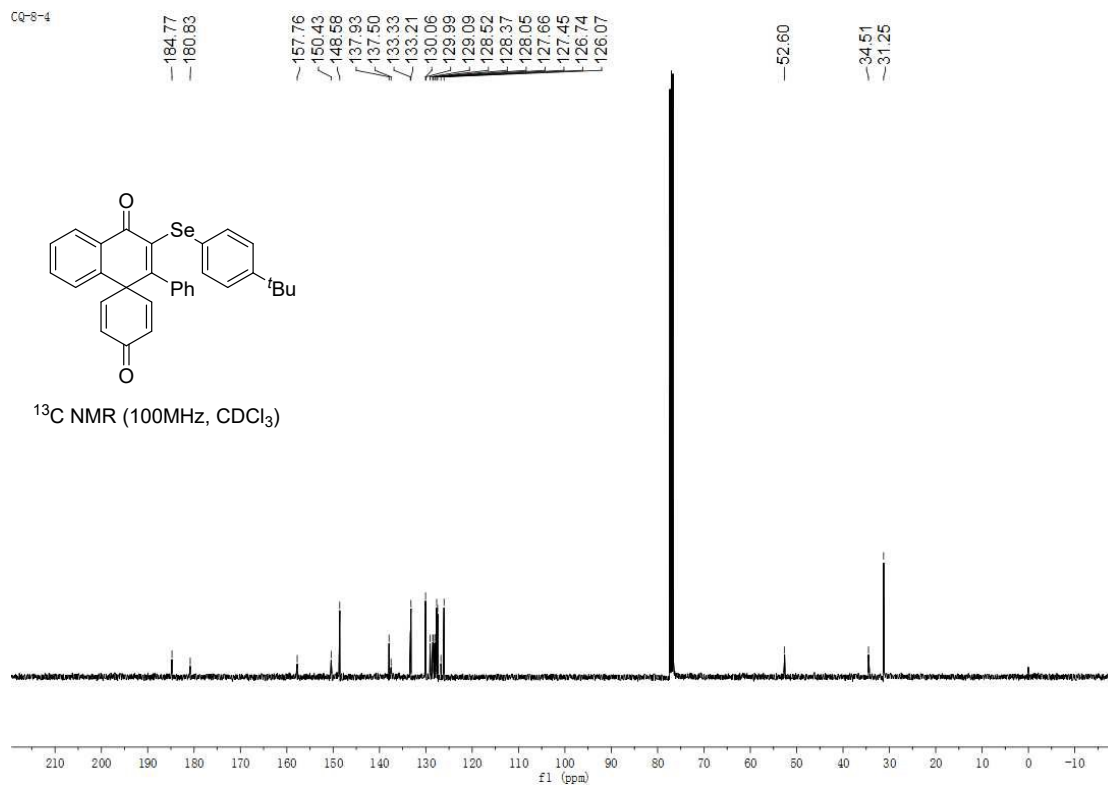

### <sup>1</sup>H NMR spectrum of **3ae**

CQ-3

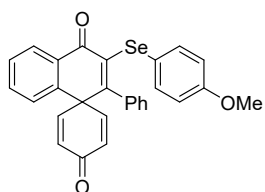

<sup>1</sup>H NMR (400MHz, CDCl<sub>3</sub>)

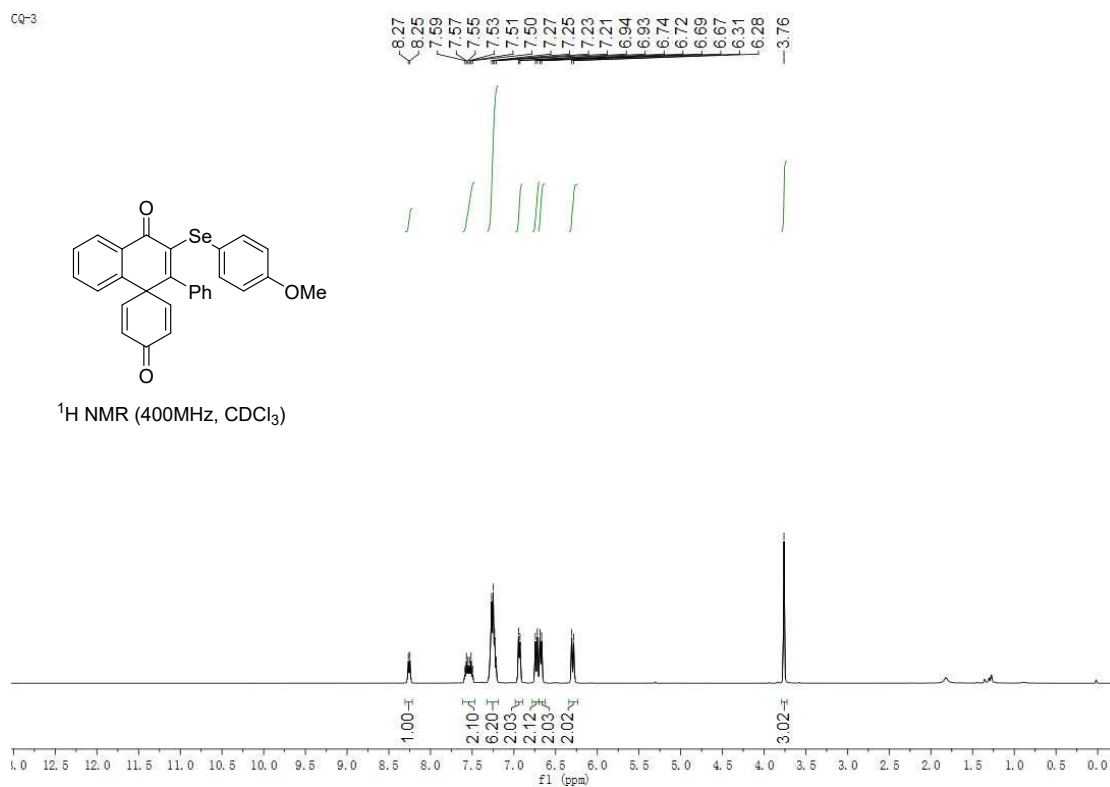

### <sup>13</sup>C NMR spectrum of **3ae**

CQ-3

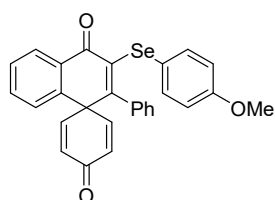

<sup>13</sup>C NMR (100MHz, CDCl<sub>3</sub>)

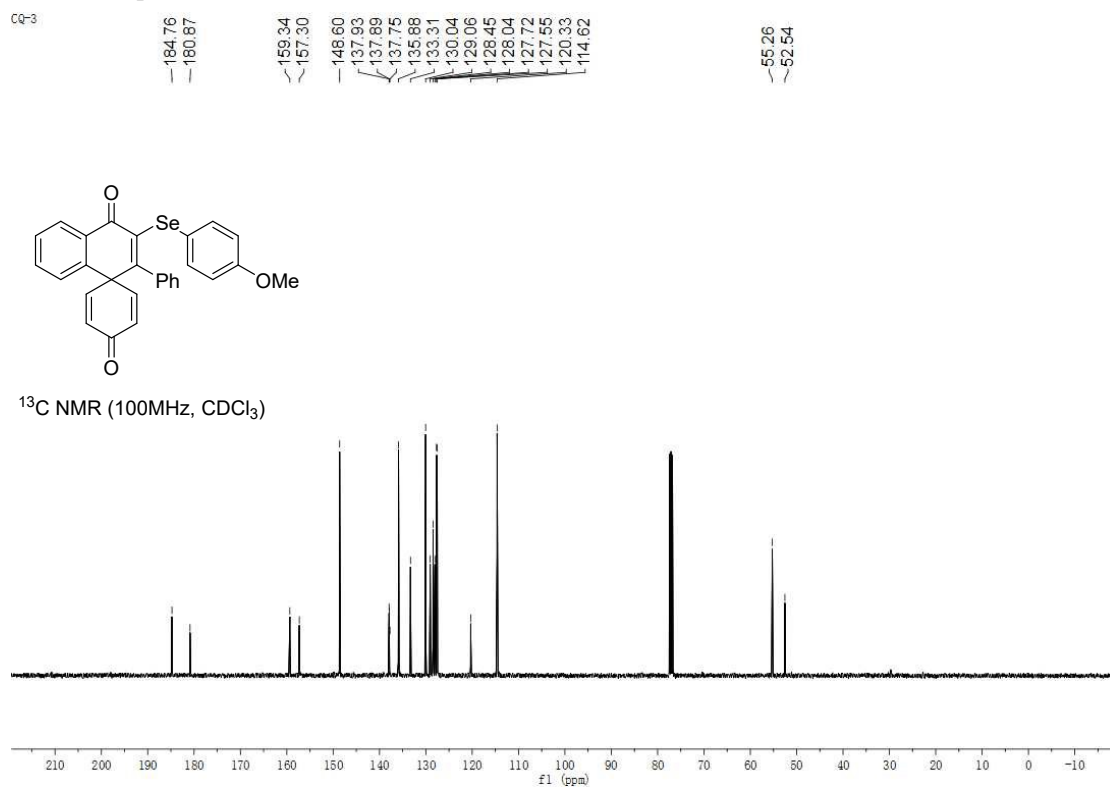

<sup>77</sup>Se NMR spectrum of **3ae**

3ae-77se.2.fid

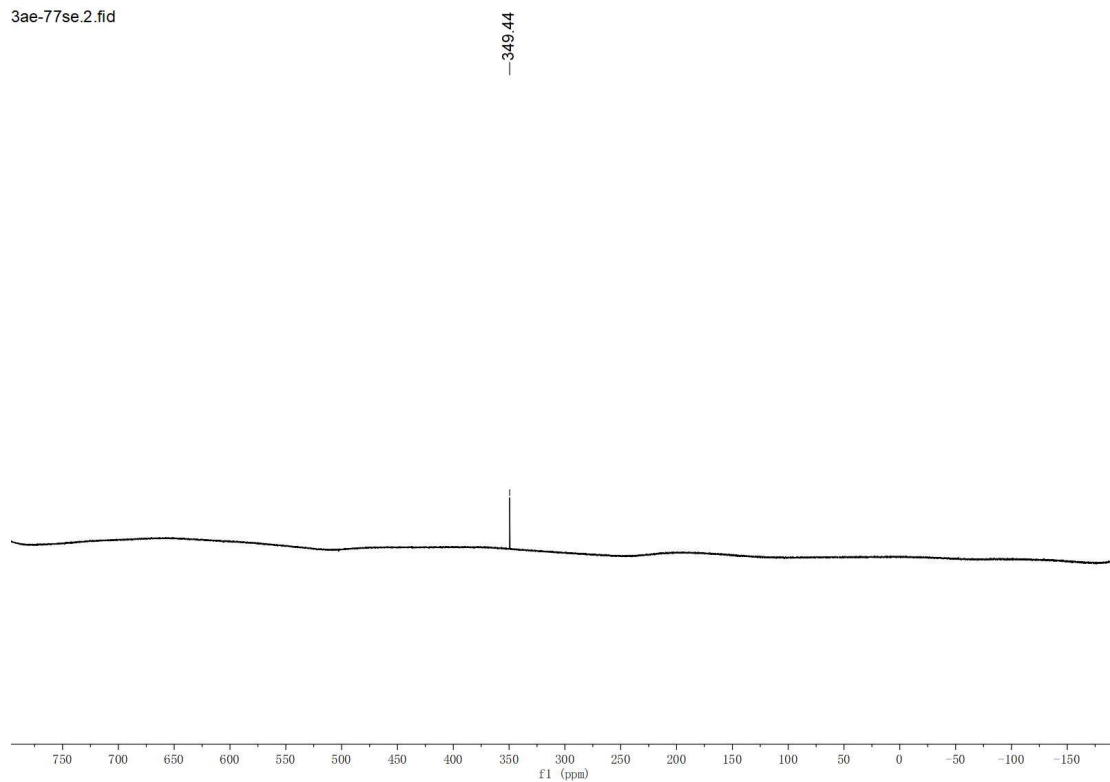

<sup>1</sup>H NMR spectrum of **3af**

cq-b

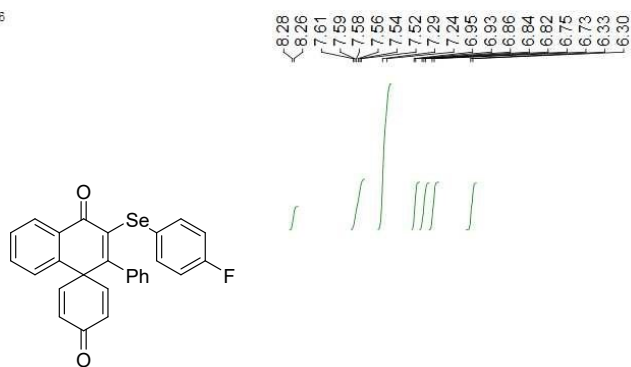

<sup>1</sup>H NMR (400MHz, CDCl<sub>3</sub>)

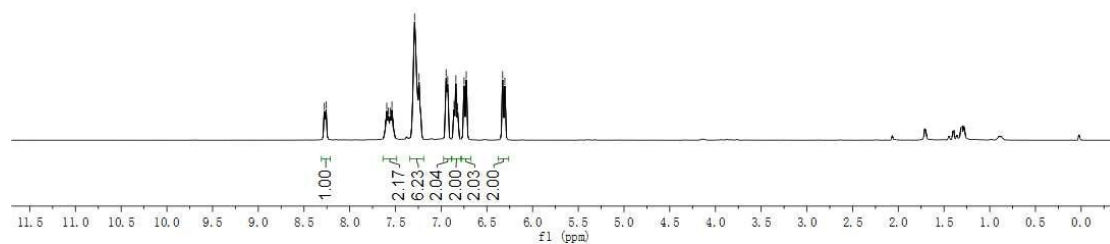

### <sup>13</sup>C NMR spectrum of **3af**

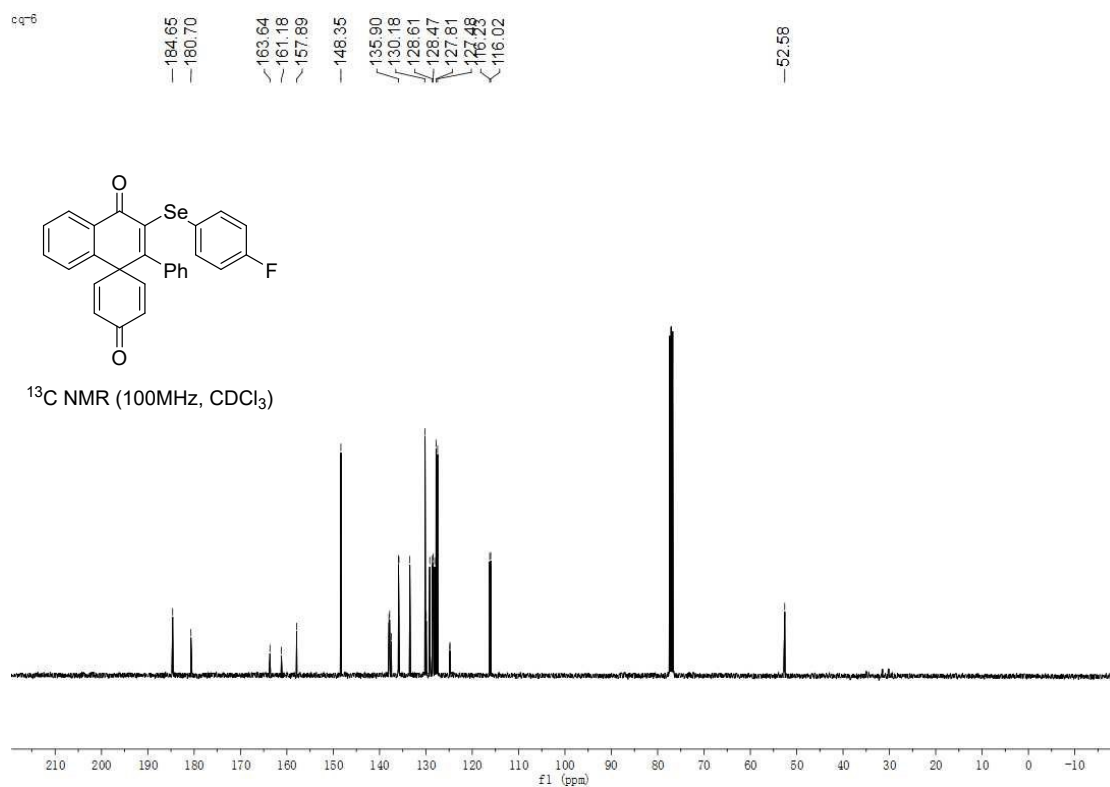

### <sup>19</sup>F NMR spectrum of **3af**

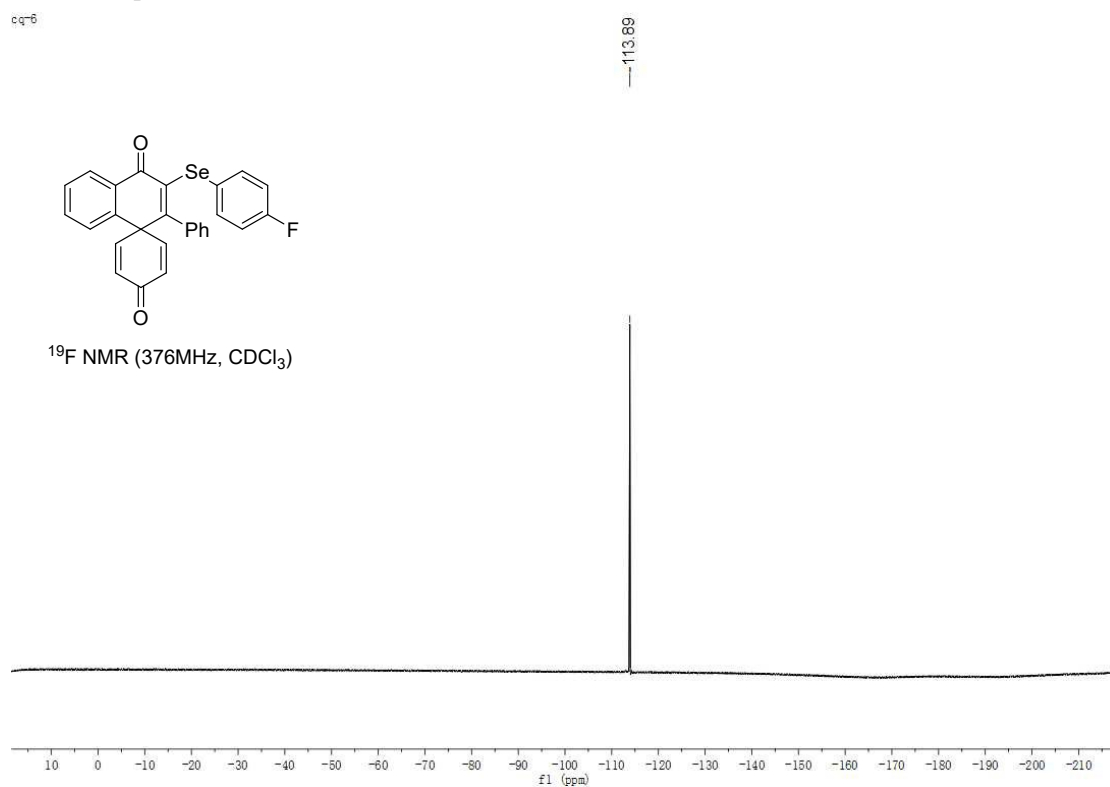

### <sup>1</sup>H NMR spectrum of **3ag**

cq-g

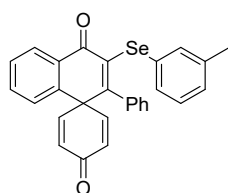

<sup>1</sup>H NMR (400MHz, CDCl<sub>3</sub>)

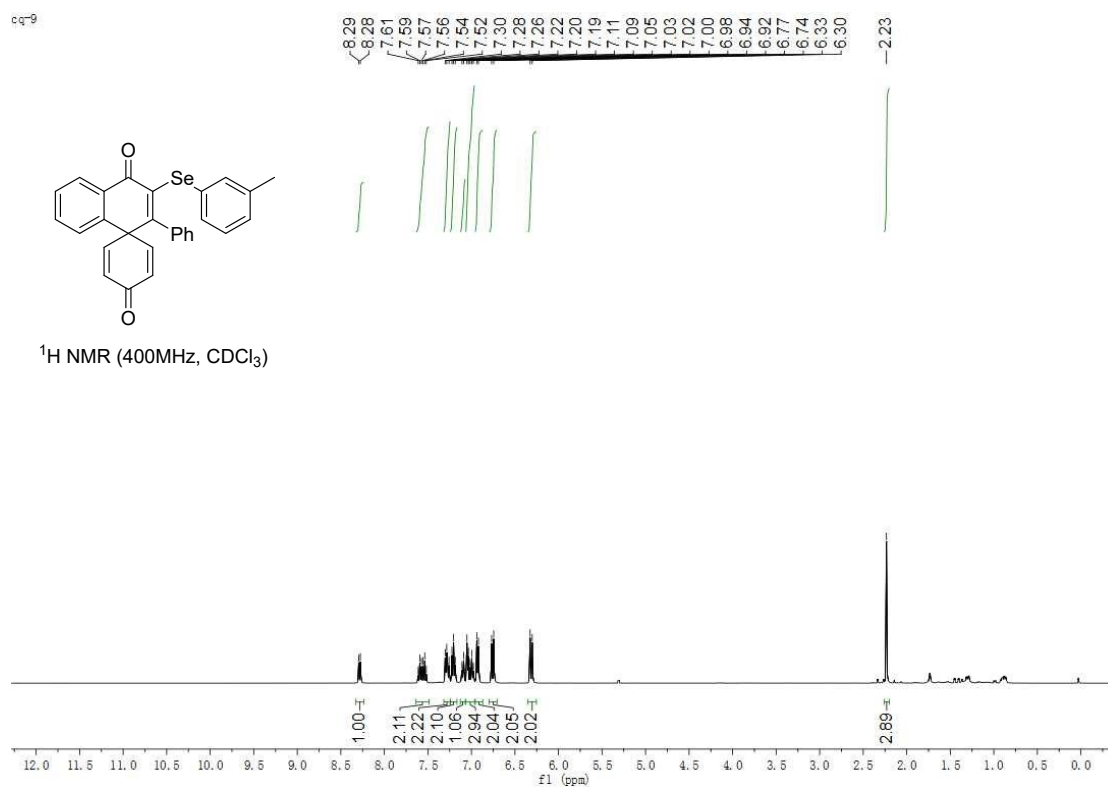

### <sup>13</sup>C NMR spectrum of **3ag**

cq-g

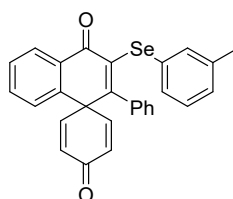

<sup>13</sup>C NMR (100MHz, CDCl<sub>3</sub>)

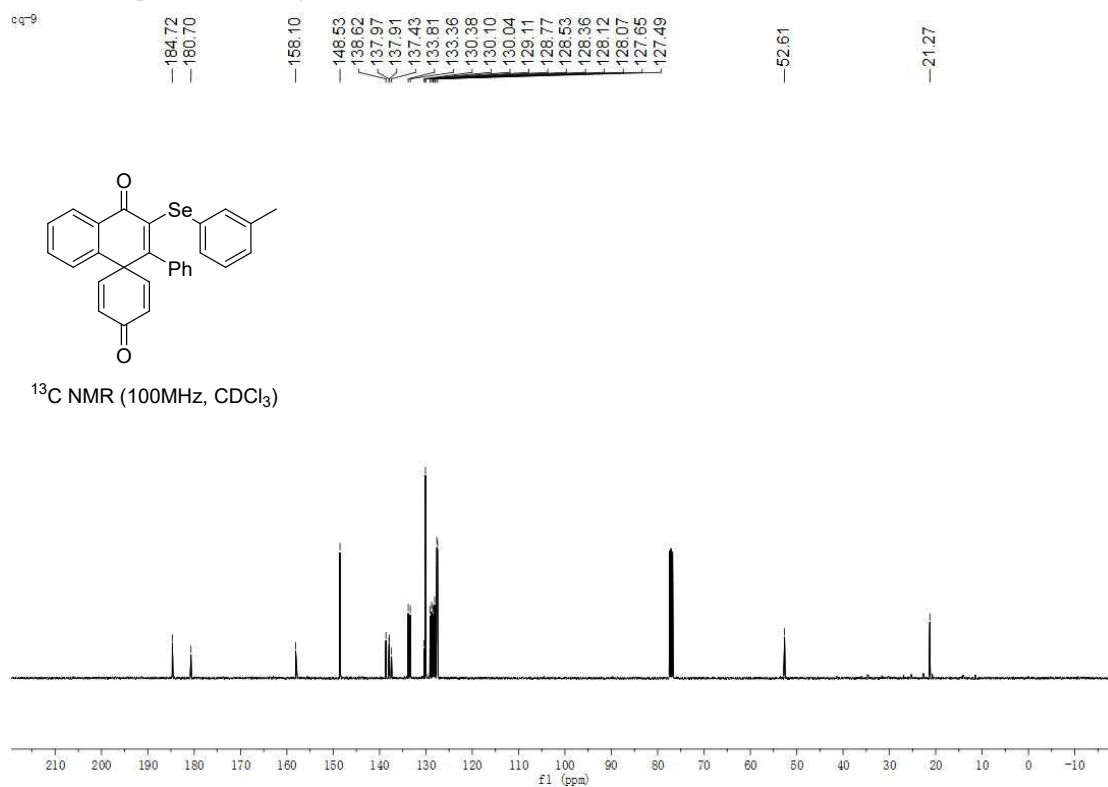

### <sup>1</sup>H NMR spectrum of **3ah**

cg-11

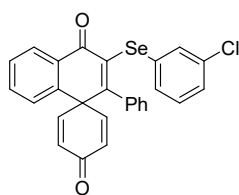

<sup>1</sup>H NMR (400MHz, CDCl<sub>3</sub>)

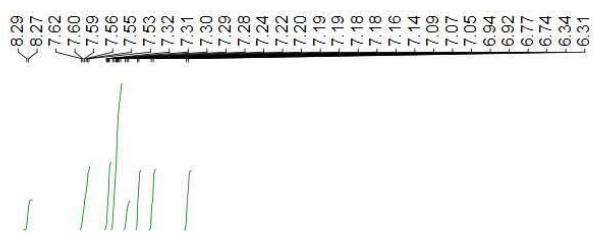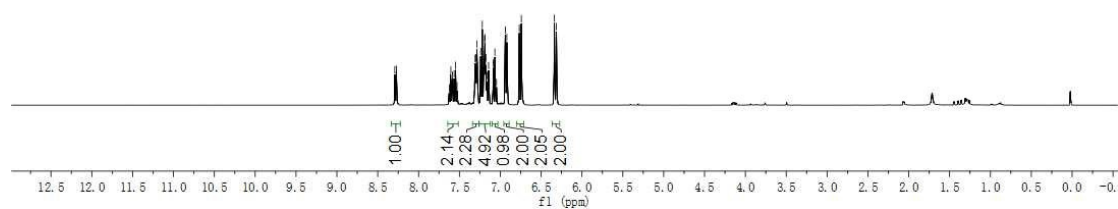

### <sup>13</sup>C NMR spectrum of **3ah**

cg-11

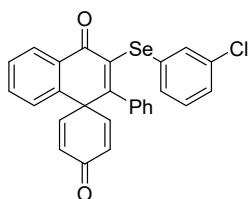

<sup>13</sup>C NMR (100MHz, CDCl<sub>3</sub>)

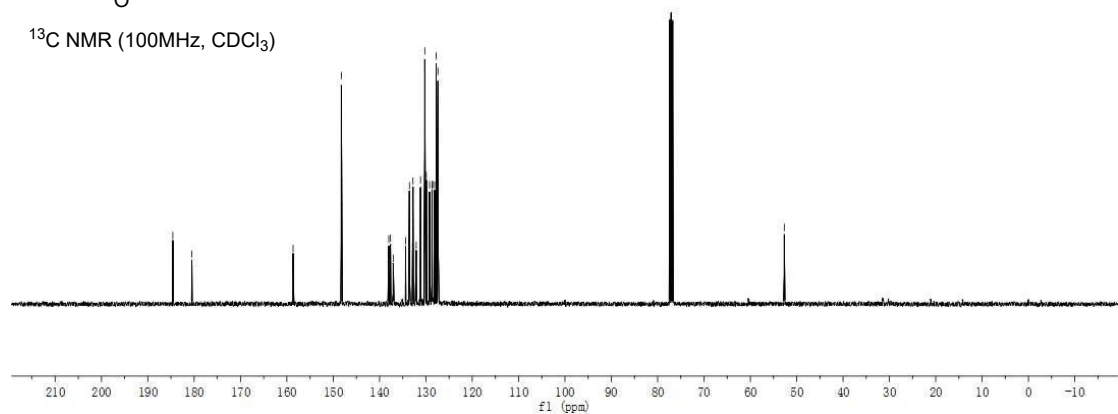



<sup>77</sup>Se NMR spectrum of **3ah**

3ah-77se.1.fid

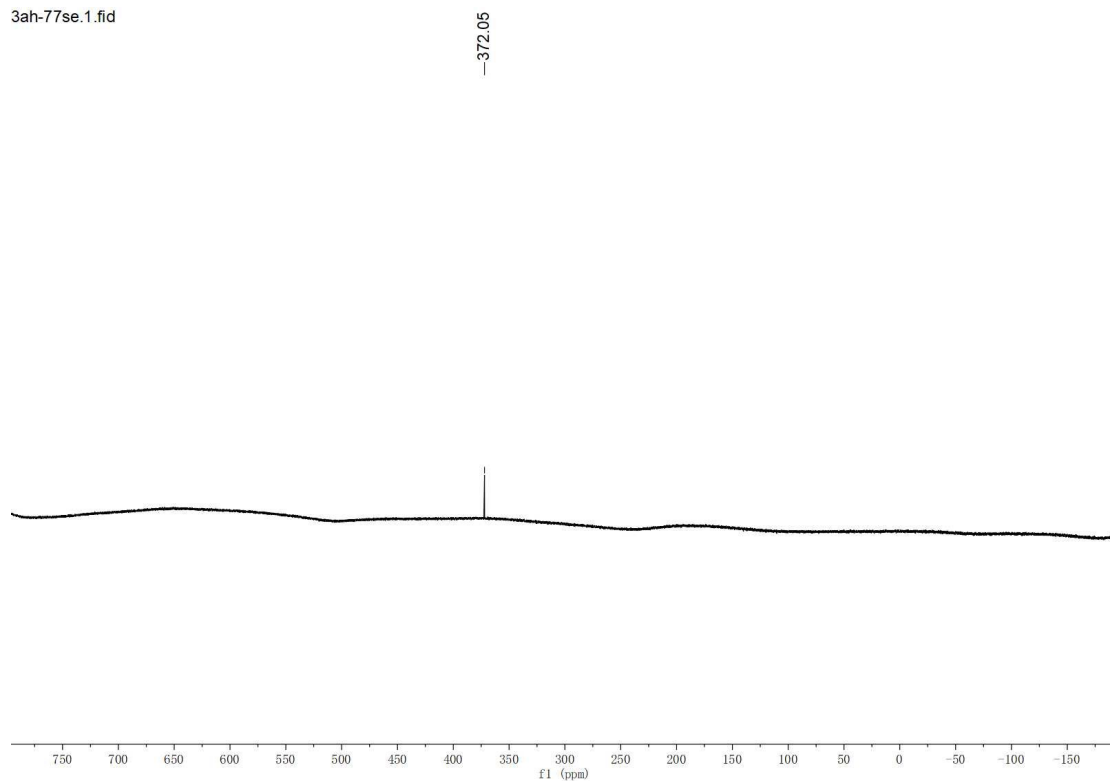

<sup>1</sup>H NMR spectrum of **3ai**

sq-10

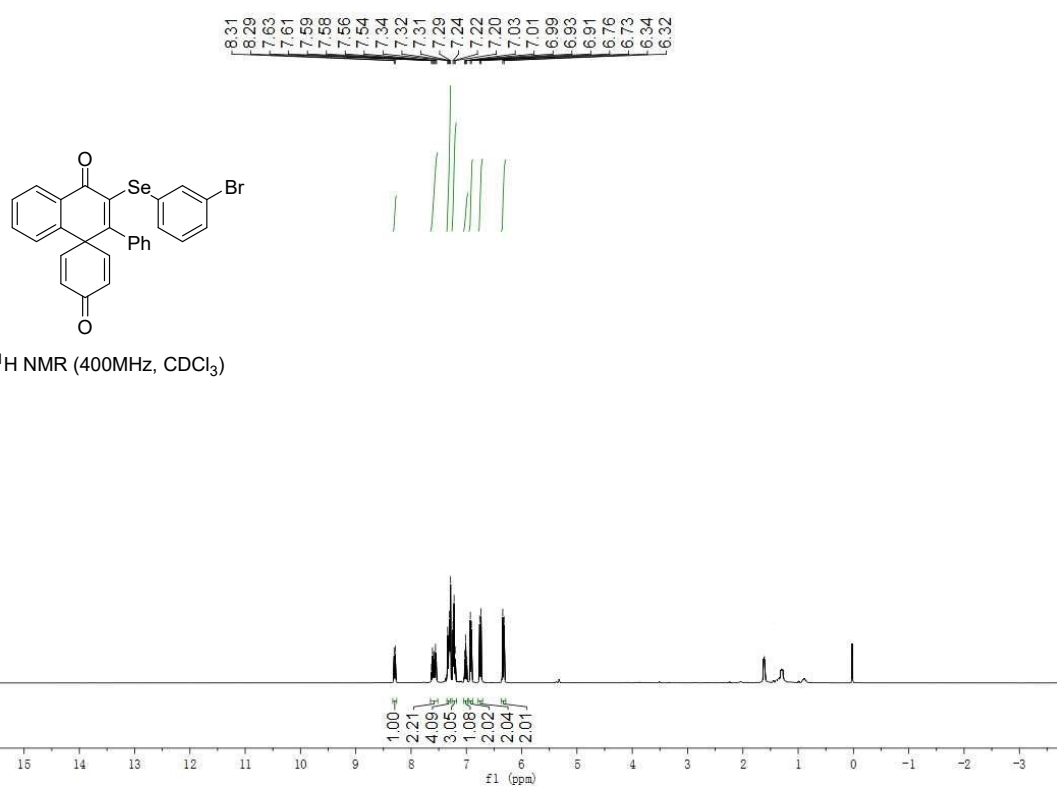

### <sup>13</sup>C NMR spectrum of **3ai**

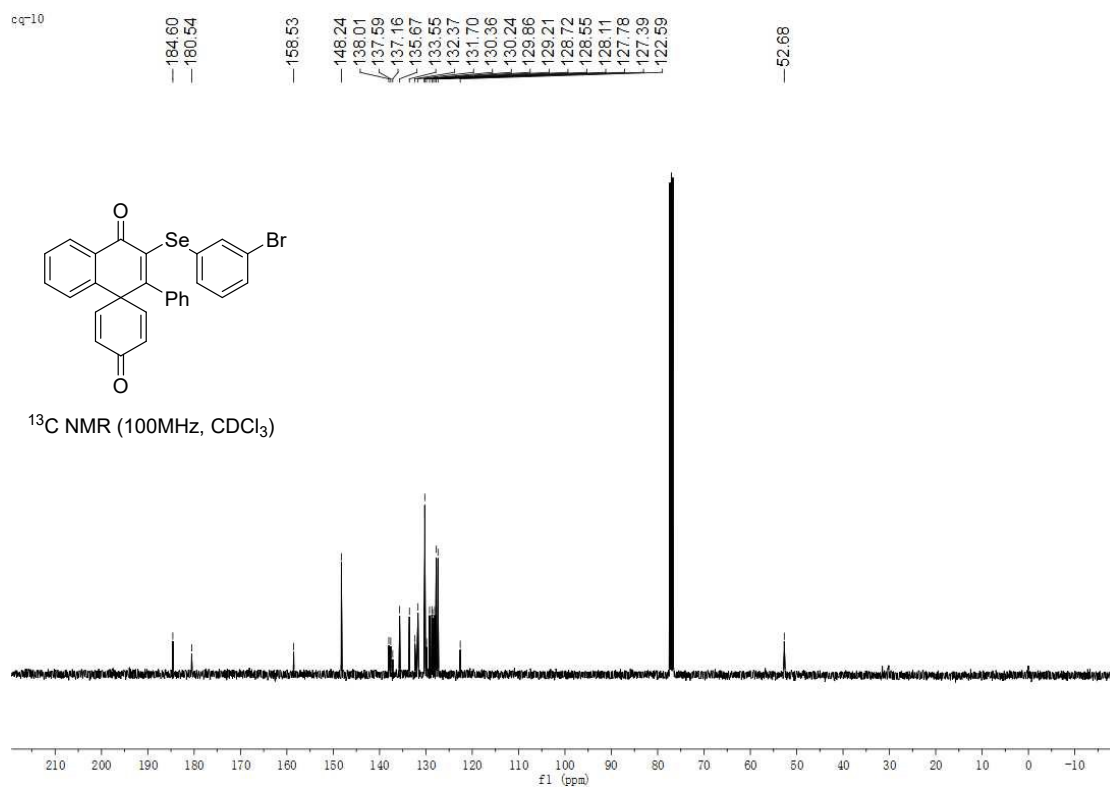

### <sup>1</sup>H NMR spectrum of **3aj**

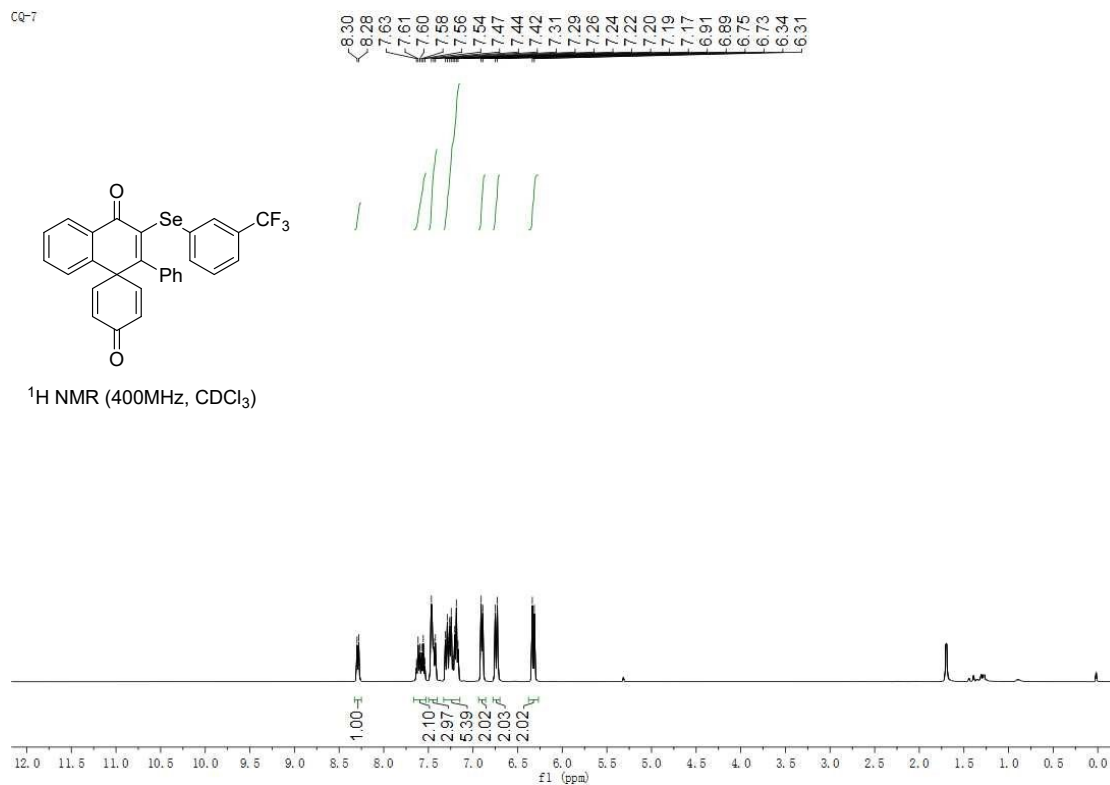

### <sup>13</sup>C NMR spectrum of **3aj**

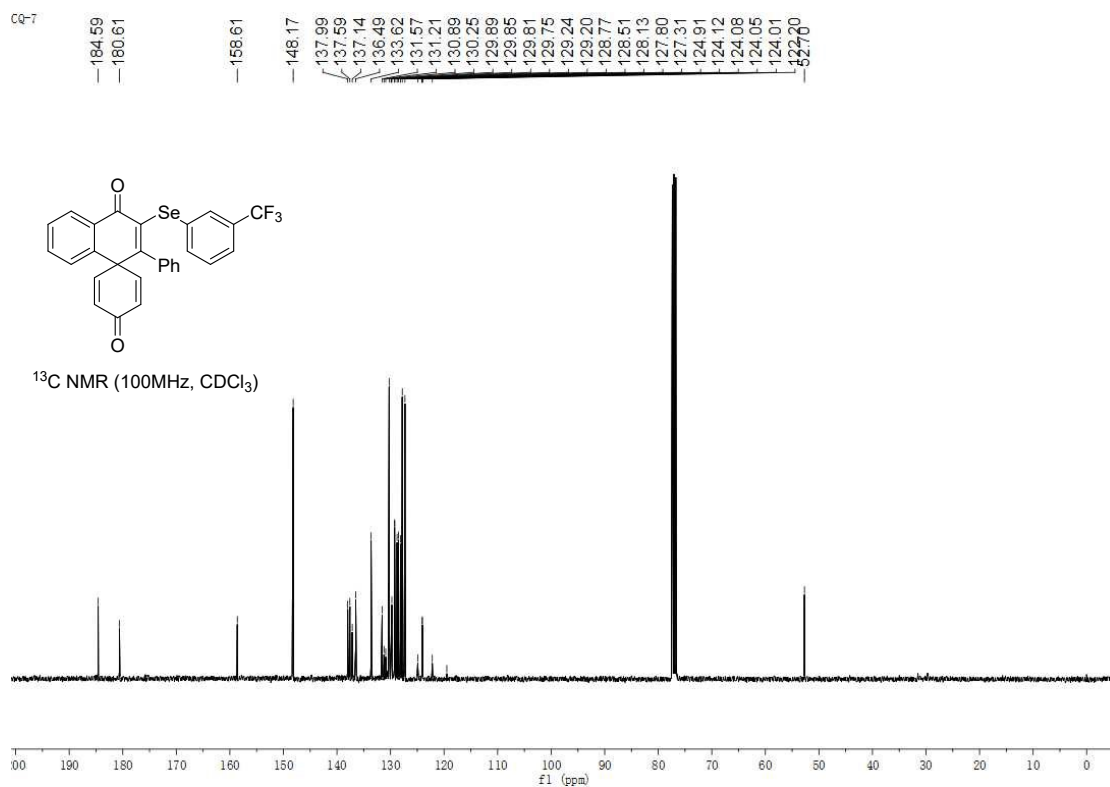

### <sup>19</sup>F NMR spectrum of **3aj**

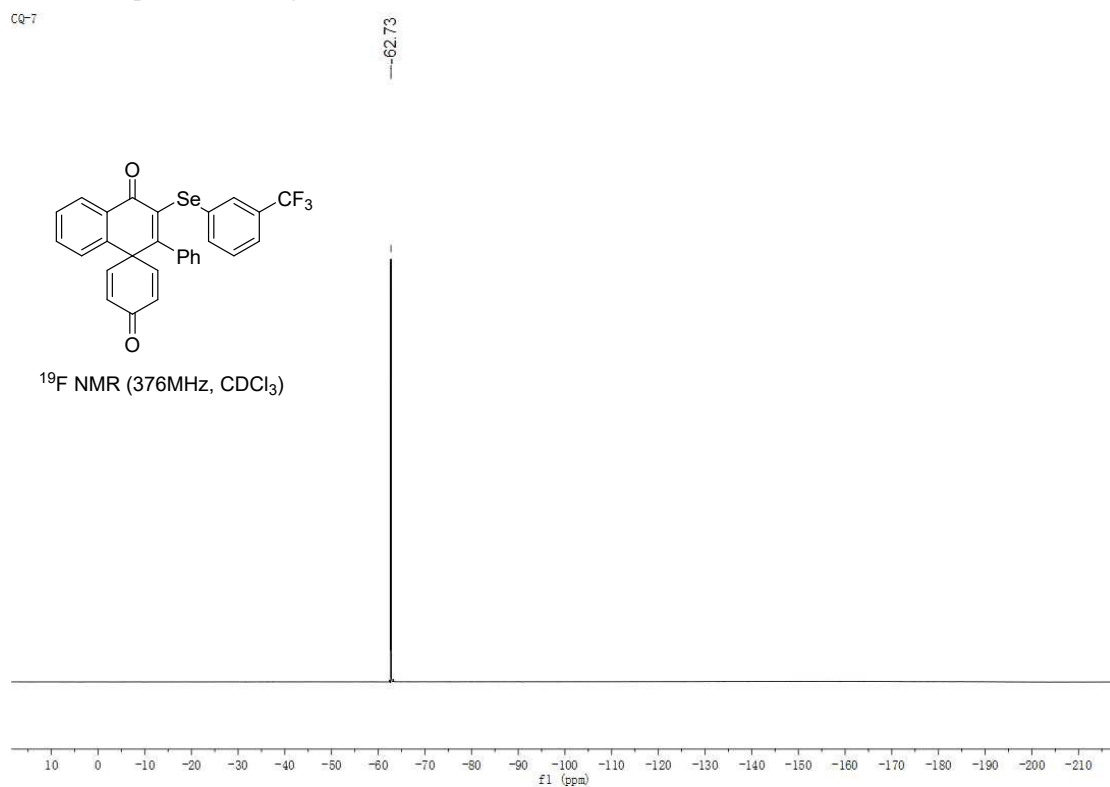

# <sup>1</sup>H NMR spectrum of **3ak**

cg-12

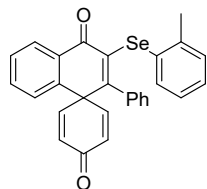

<sup>1</sup>H NMR (400MHz, CDCl<sub>3</sub>)

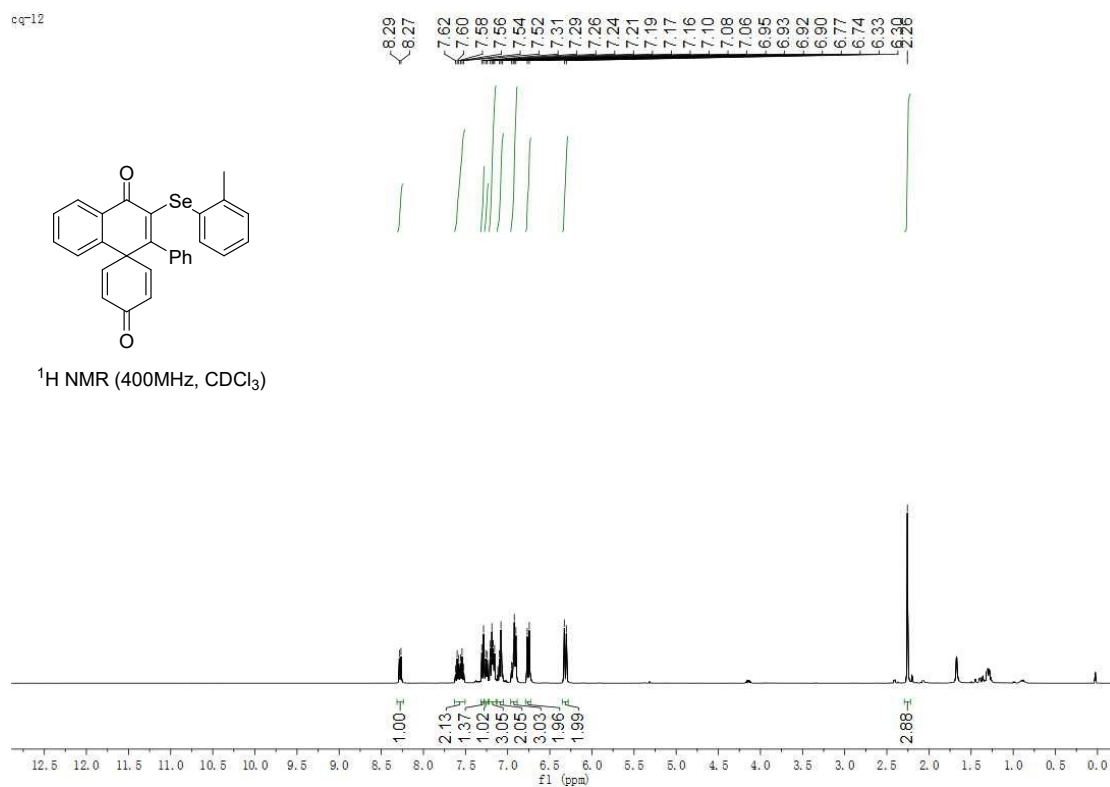

# <sup>13</sup>C NMR spectrum of **3ak**

cg-12

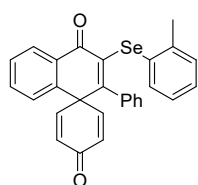

<sup>13</sup>C NMR (100MHz, CDCl<sub>3</sub>)

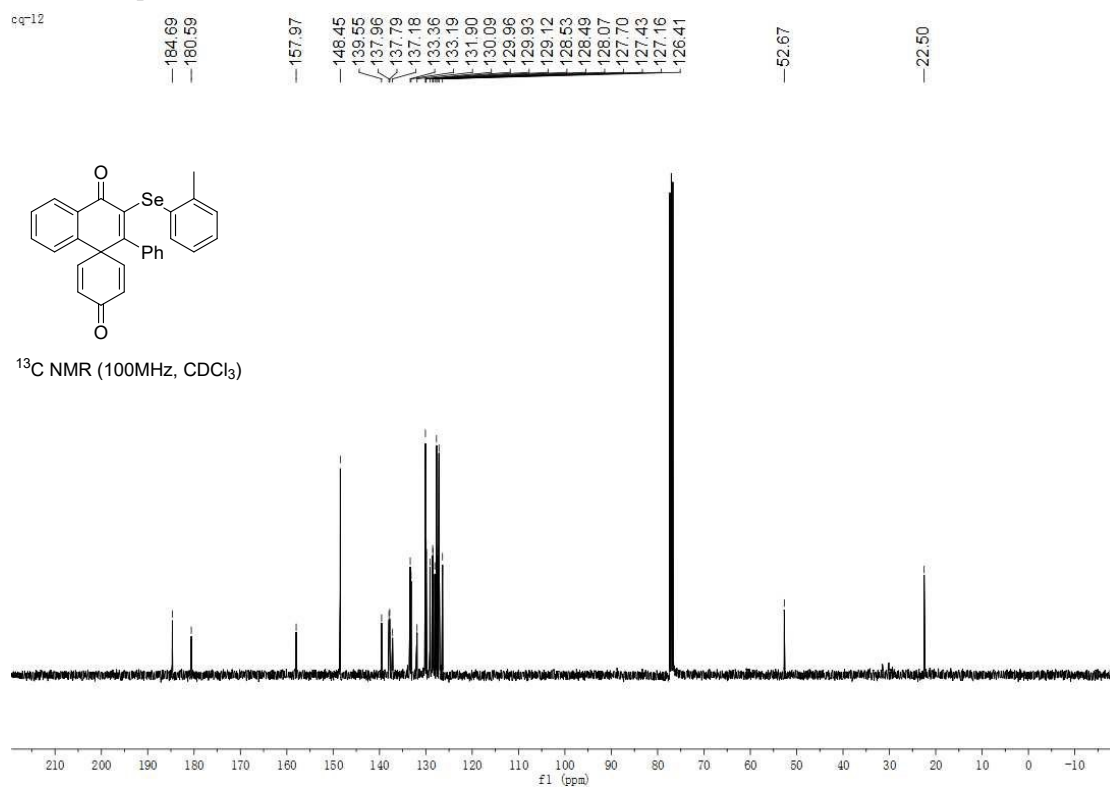

<sup>1</sup>H NMR spectrum of **3al**

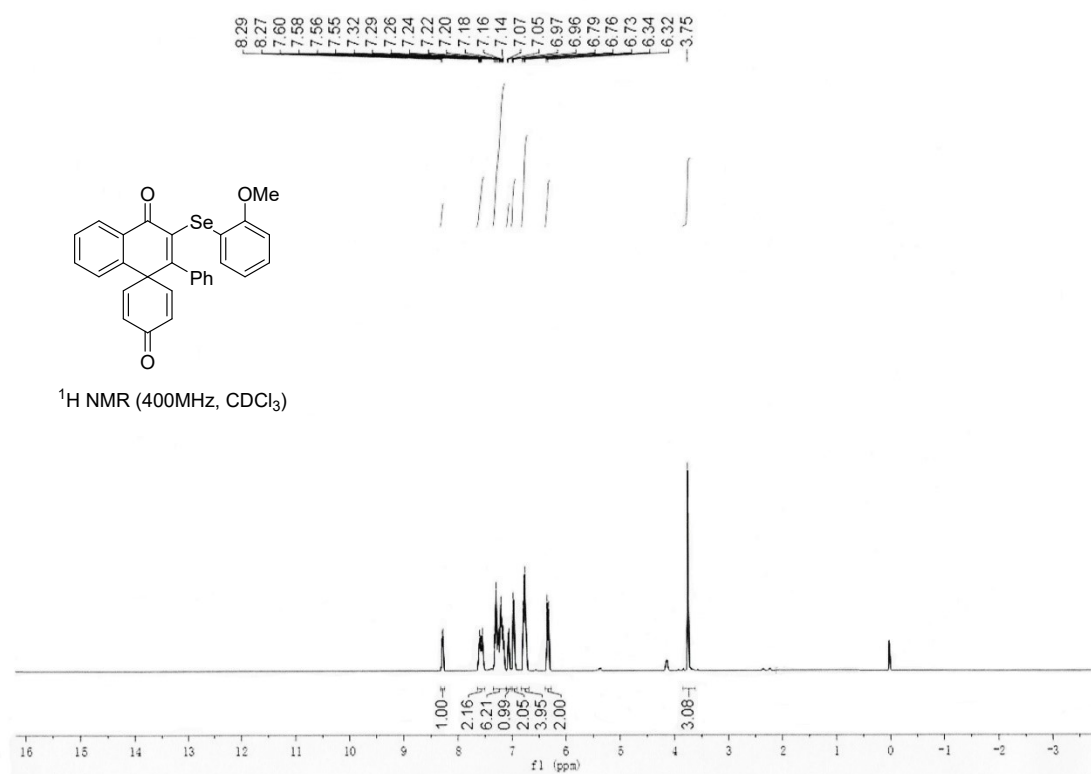

<sup>13</sup>C NMR spectrum of **3al**

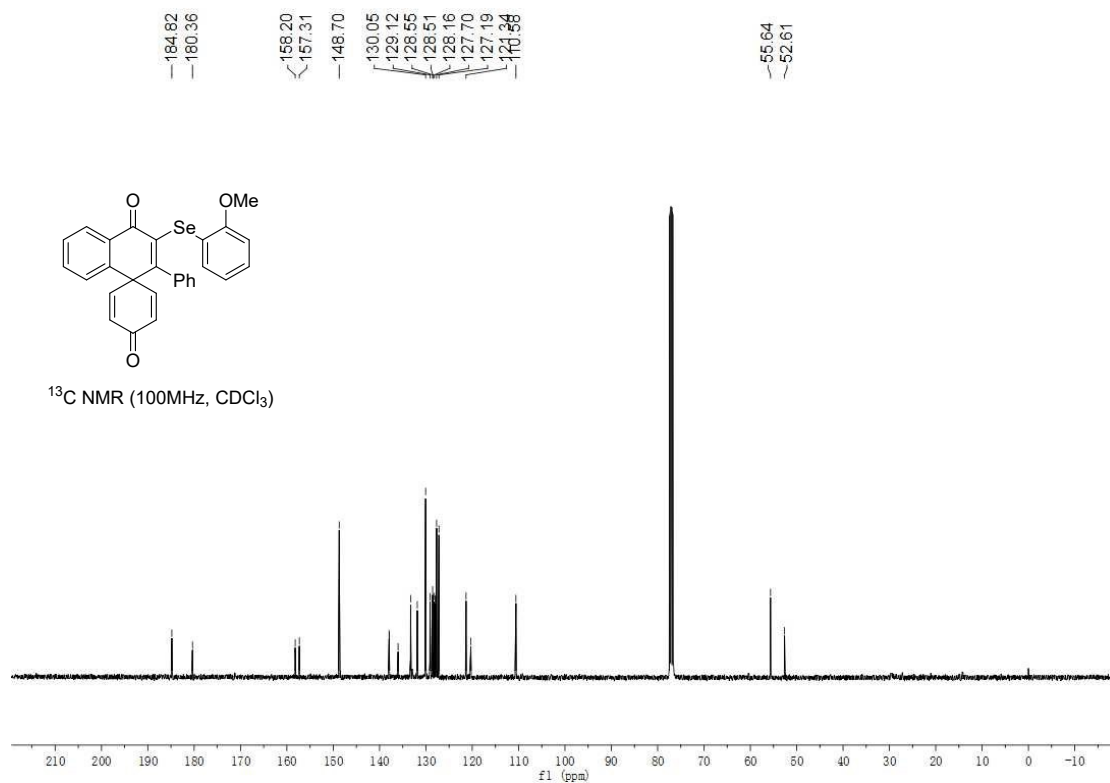

<sup>1</sup>H NMR spectrum of **3am**

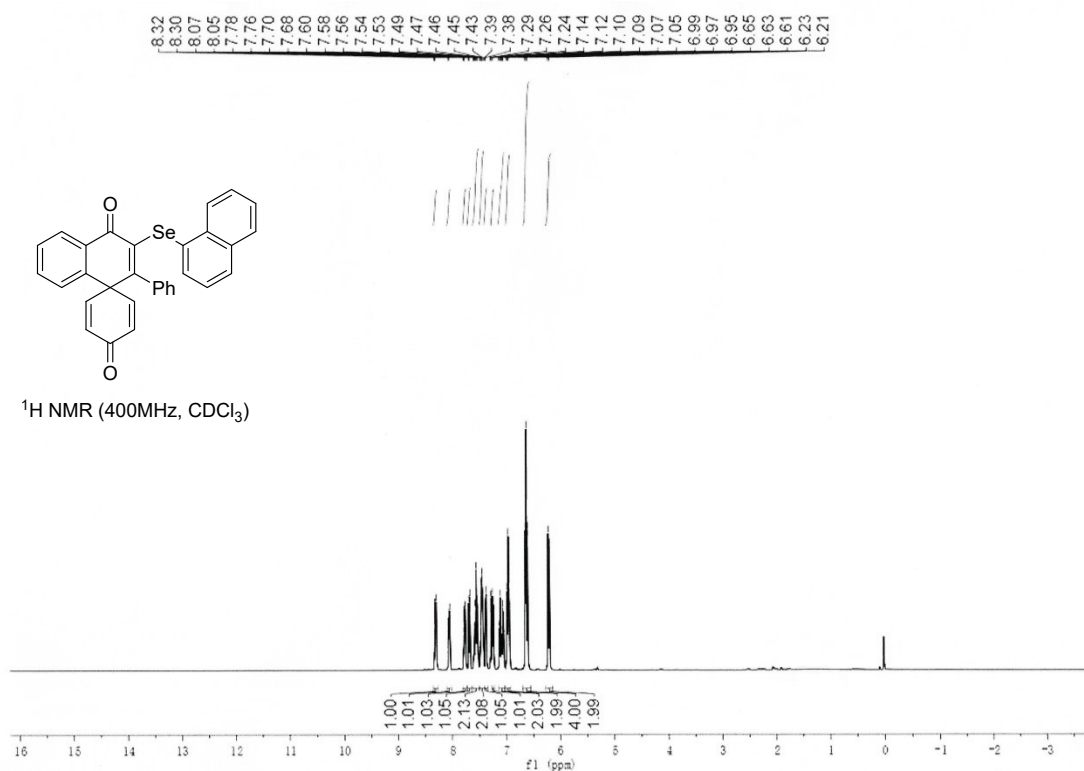

<sup>13</sup>C NMR spectrum of **3am**

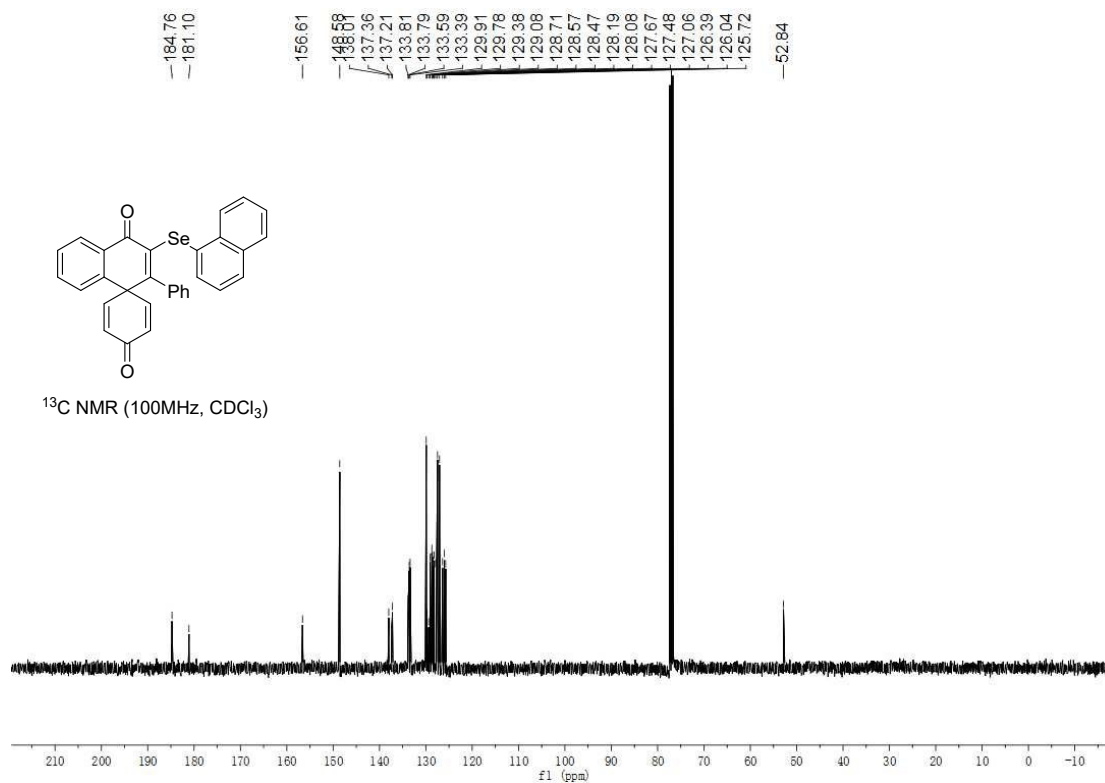

### <sup>1</sup>H NMR spectrum of **3an**

CQ-14-6

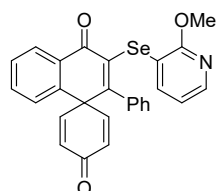

<sup>1</sup>H NMR (400MHz, CDCl<sub>3</sub>)

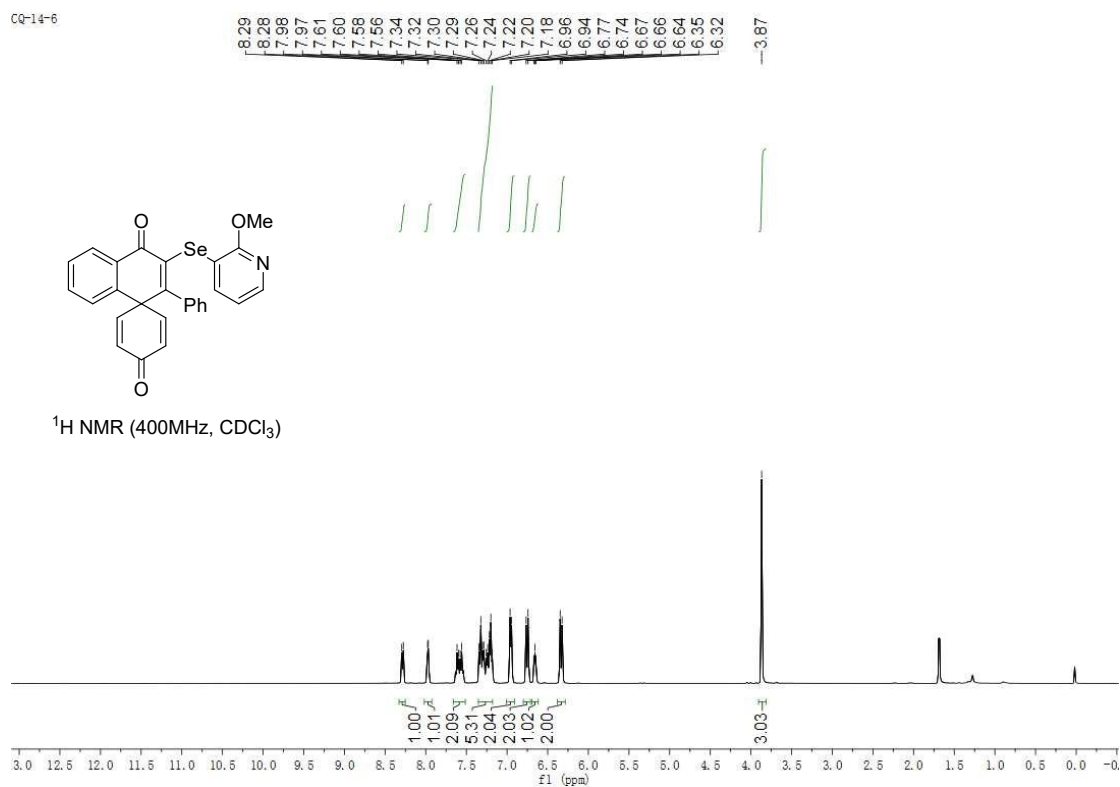

### <sup>13</sup>C NMR spectrum of **3an**

CQ-14-6

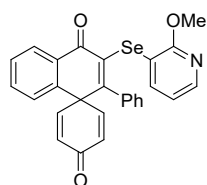

<sup>13</sup>C NMR (100MHz, CDCl<sub>3</sub>)

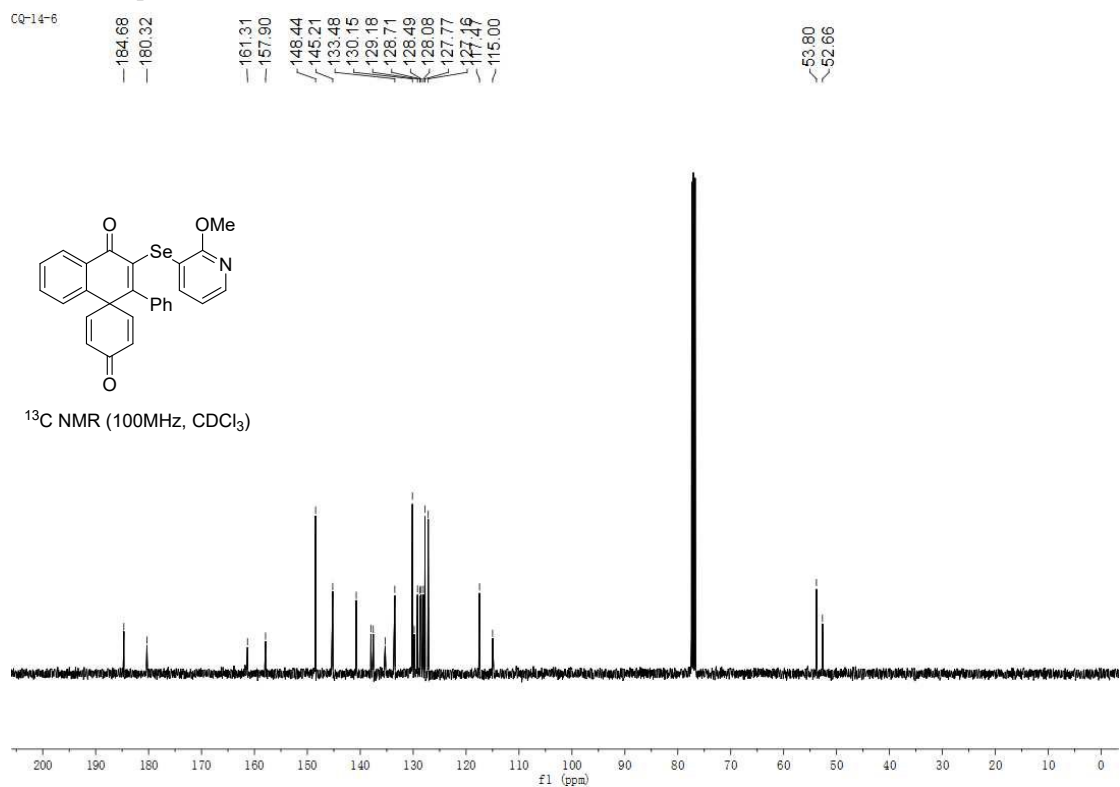

### <sup>1</sup>H NMR spectrum of **3ba**

cq-16

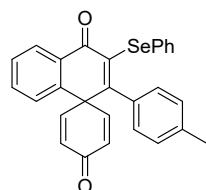

<sup>1</sup>H NMR (400MHz, CDCl<sub>3</sub>)

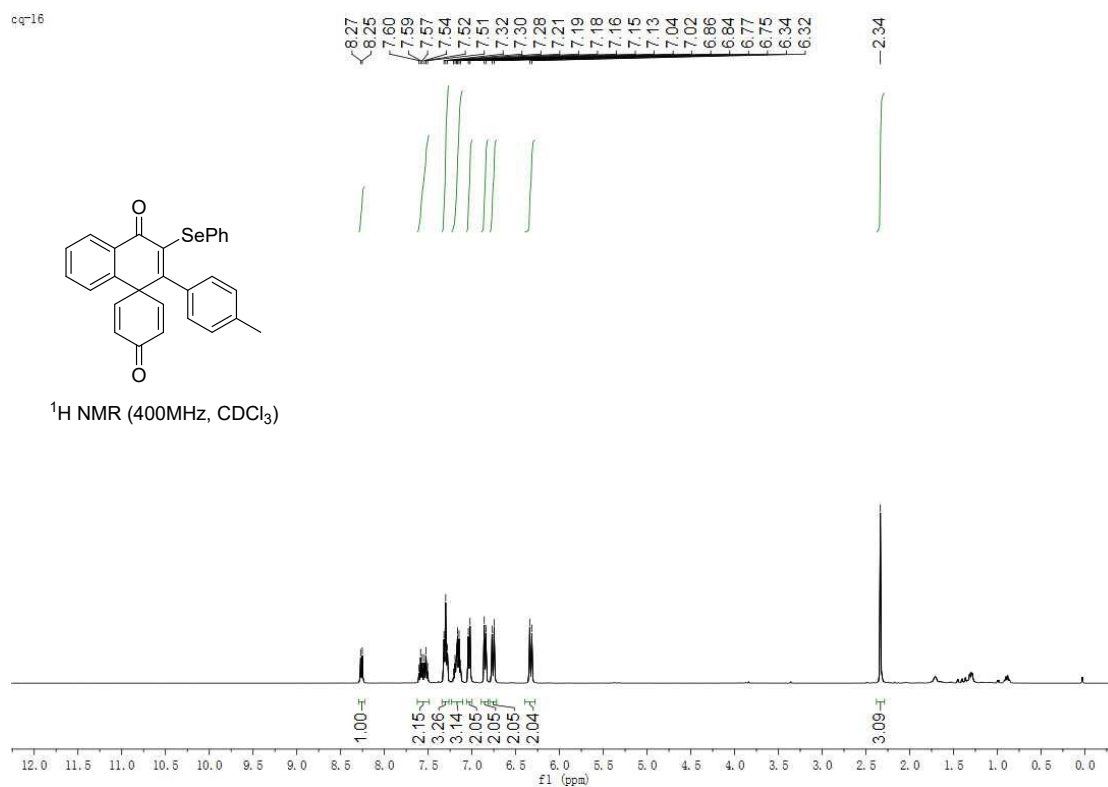

### <sup>13</sup>C NMR spectrum of **3ba**

cq-16

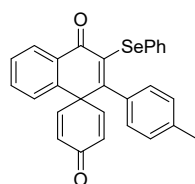

<sup>13</sup>C NMR (100MHz, CDCl<sub>3</sub>)

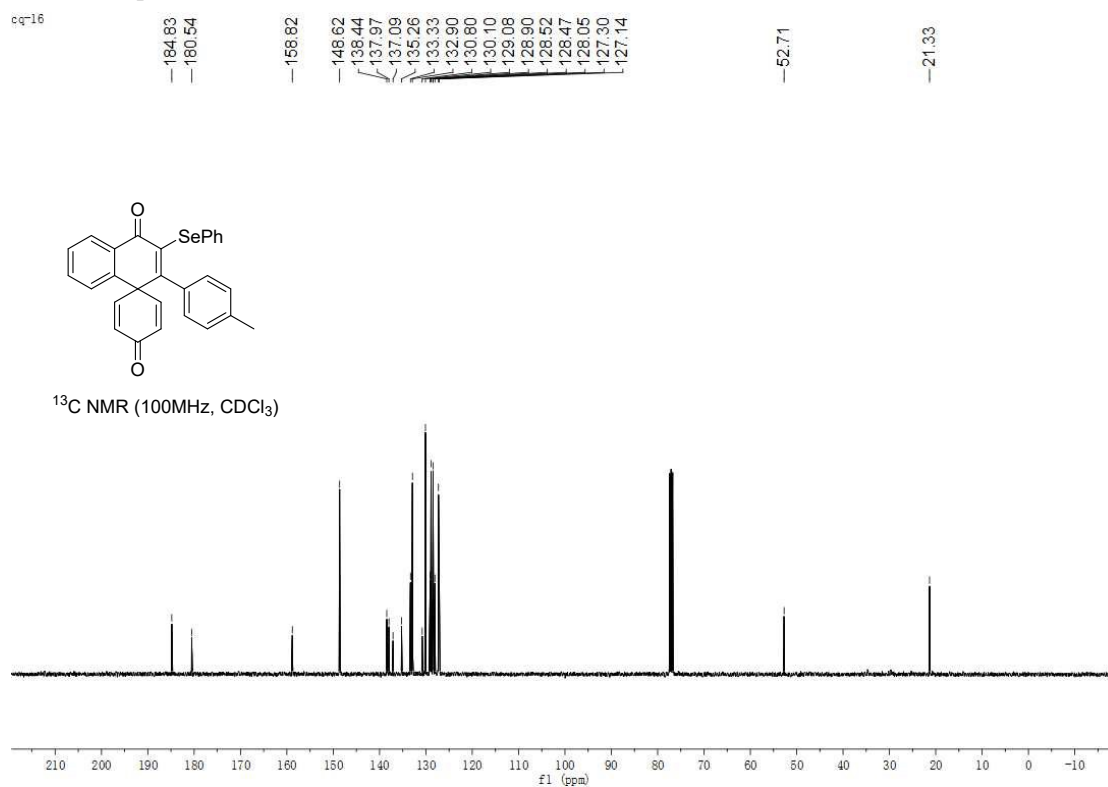



# <sup>77</sup>Se NMR spectrum of **3ba**

3ba-77se.1.fid

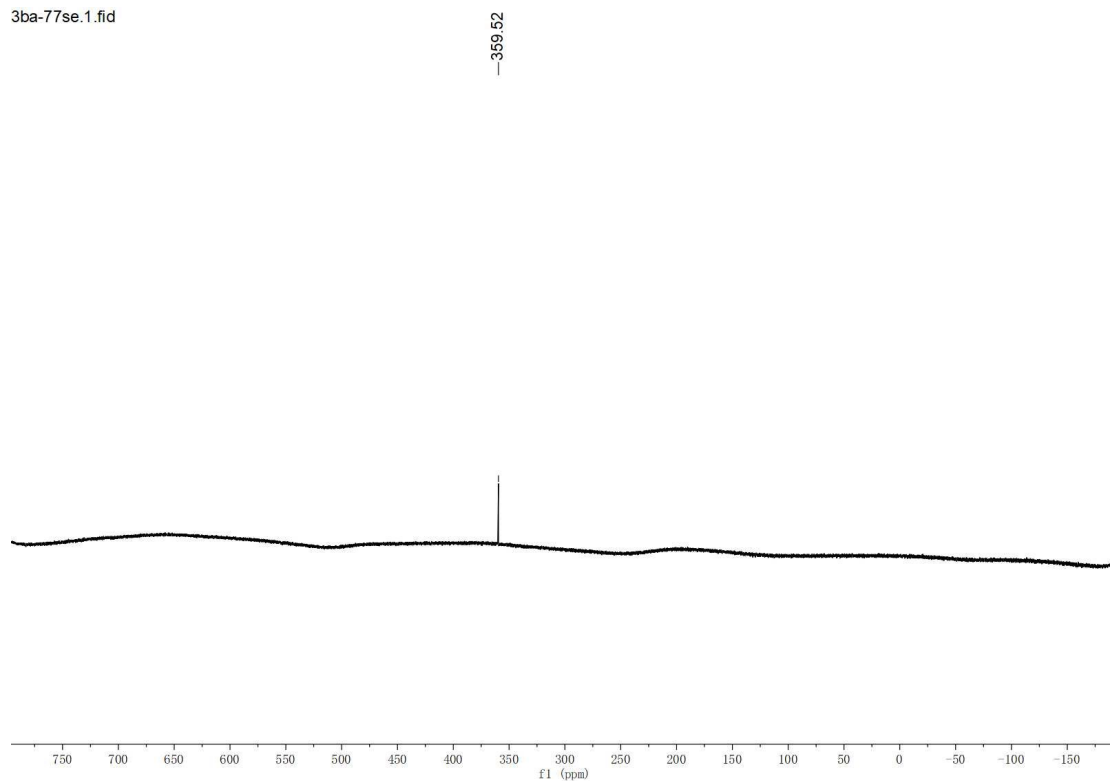

# <sup>1</sup>H NMR spectrum of **3ca**

ca-17

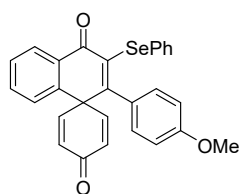

<sup>1</sup>H NMR (400MHz, CDCl<sub>3</sub>)

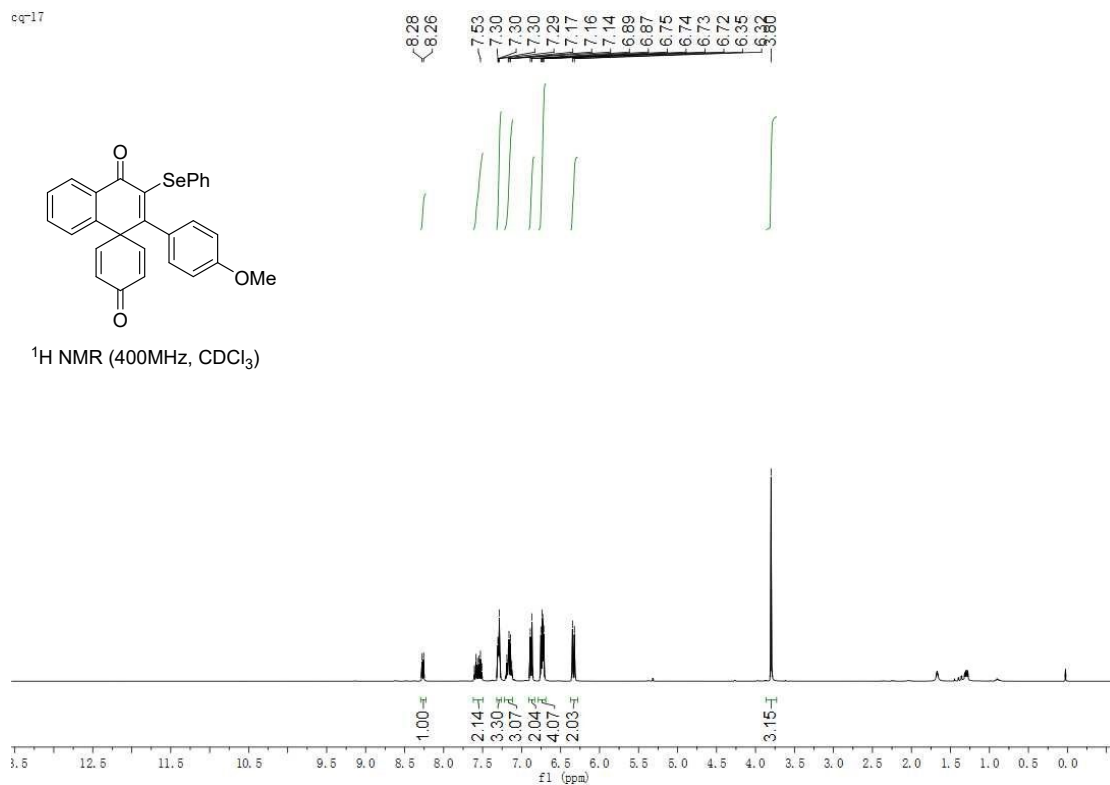

### <sup>13</sup>C NMR spectrum of **3ca**

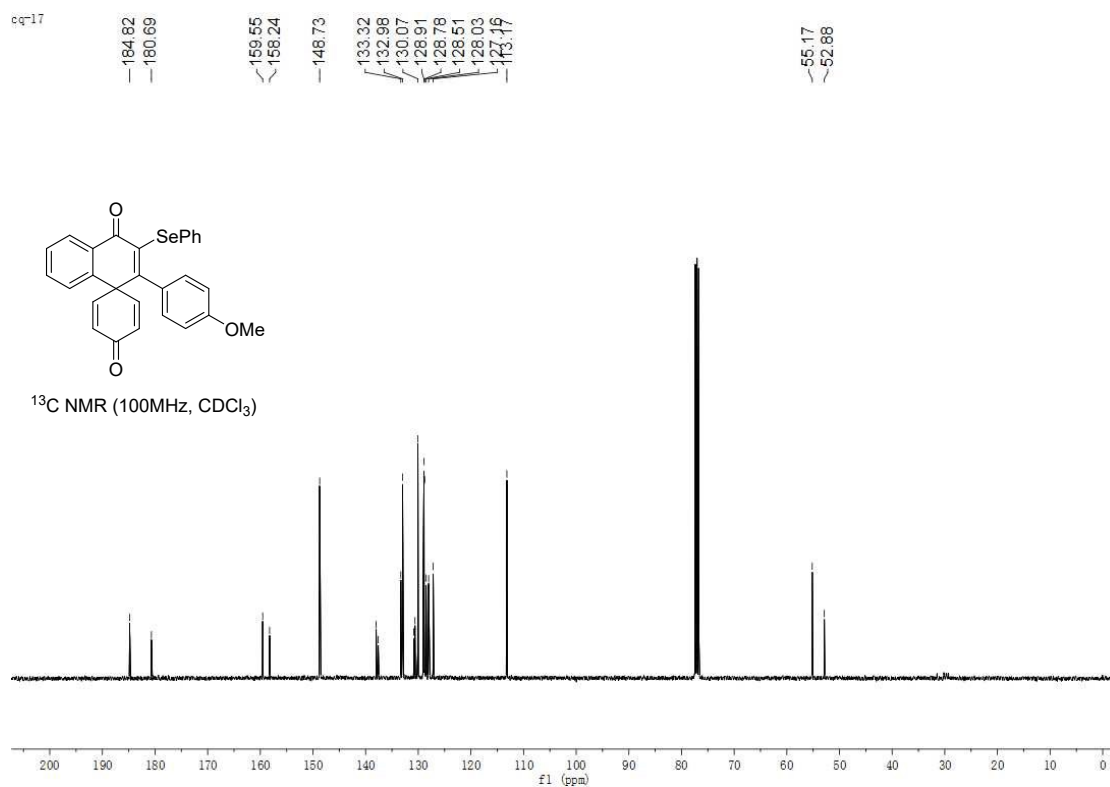

### <sup>1</sup>H NMR spectrum of **3da**

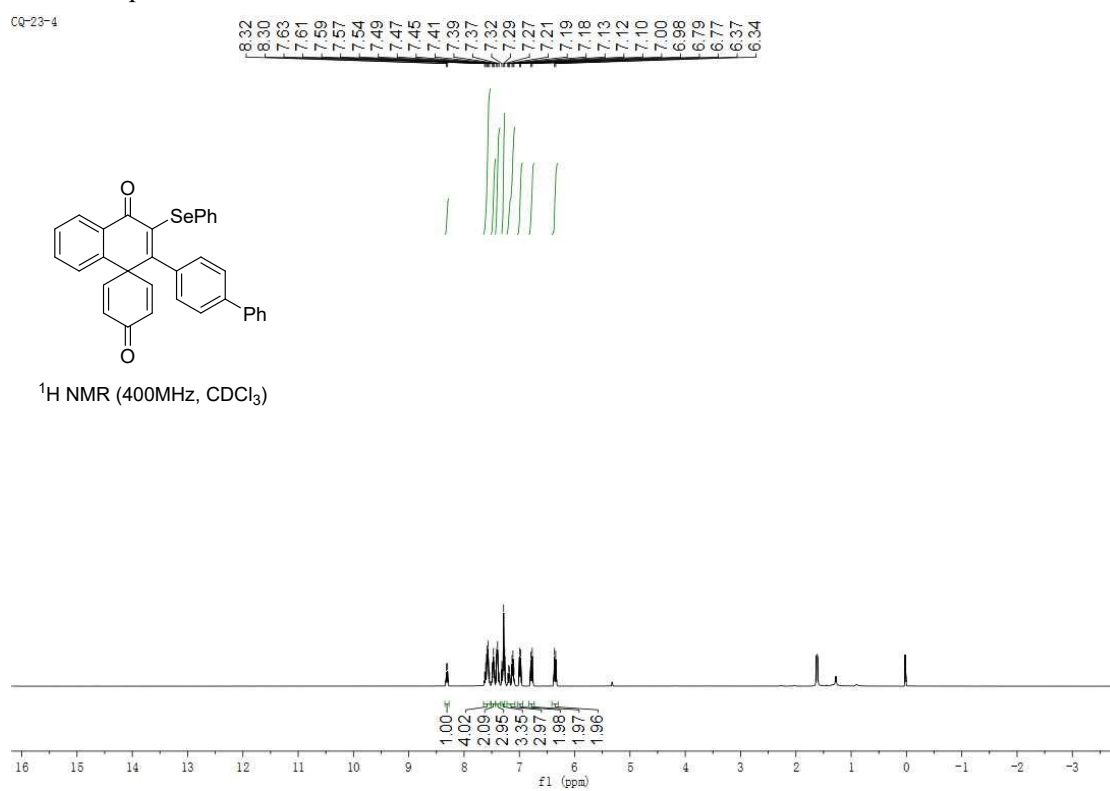

### <sup>13</sup>C NMR spectrum of **3da**

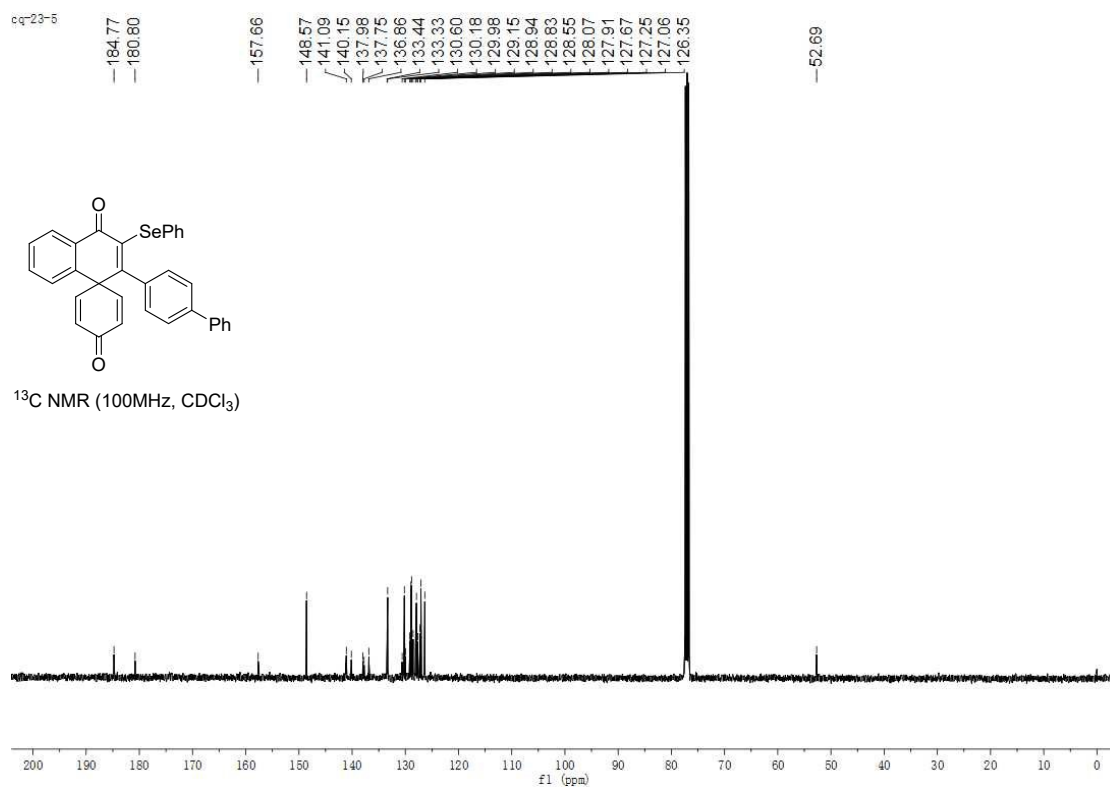

### <sup>1</sup>H NMR spectrum of **3ea**

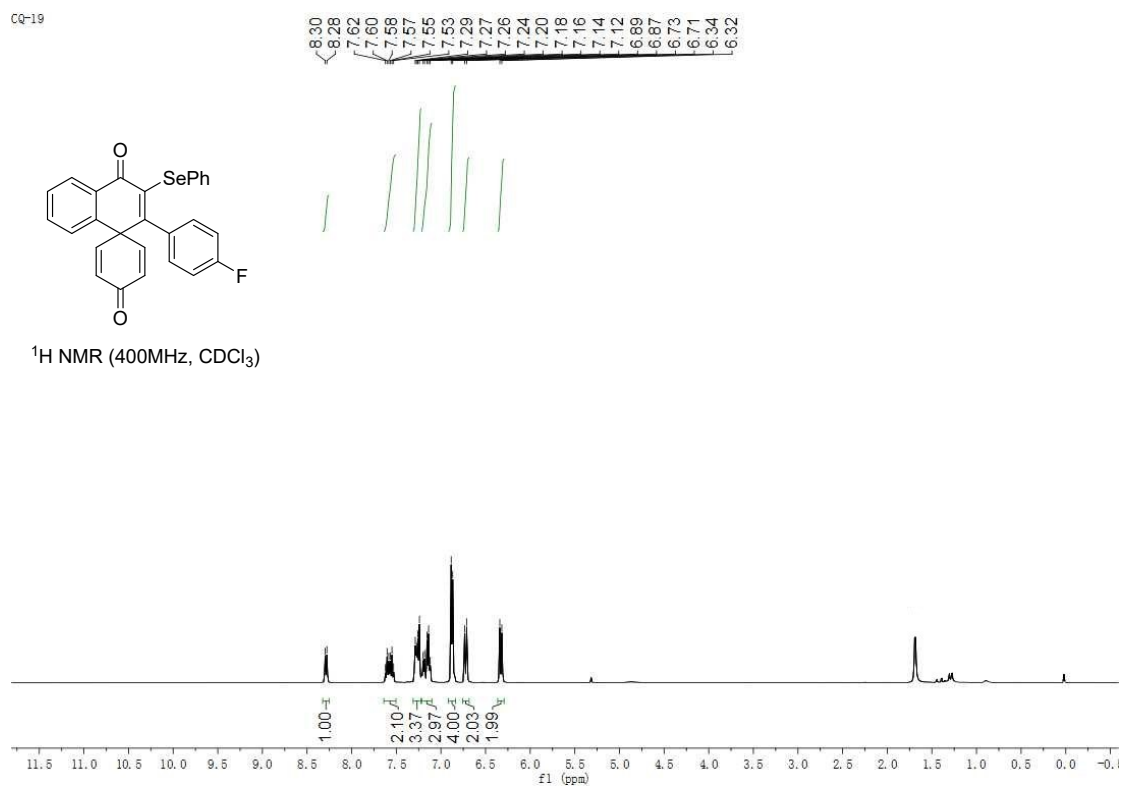

### <sup>13</sup>C NMR spectrum of **3ea**

CQ-19

—184.54  
—180.70  
  
—163.65  
—161.17  
—156.76  
  
—148.37  
  
—133.51  
—133.25  
—130.23  
—129.49  
—129.21  
—129.02  
—128.55  
—127.82  
—127.02  
—114.80

—52.63

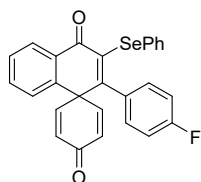

<sup>13</sup>C NMR (100MHz, CDCl<sub>3</sub>)

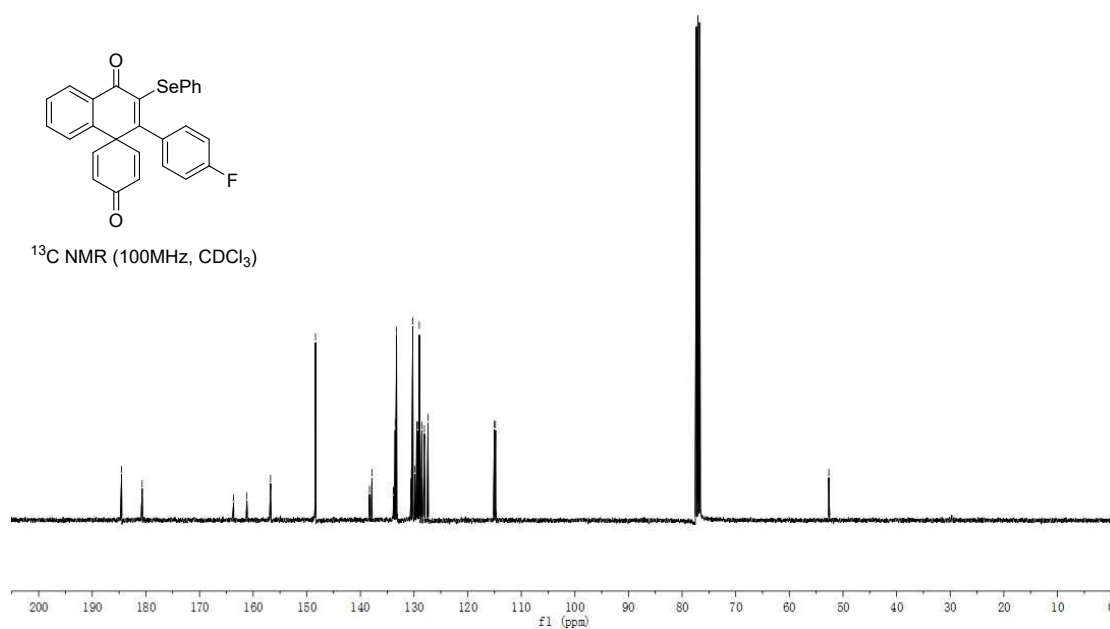

### <sup>19</sup>F NMR spectrum of **3ea**

CQ-19

—112.26

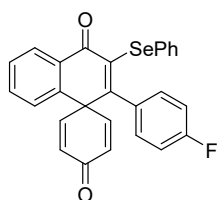

<sup>19</sup>F NMR (376MHz, CDCl<sub>3</sub>)

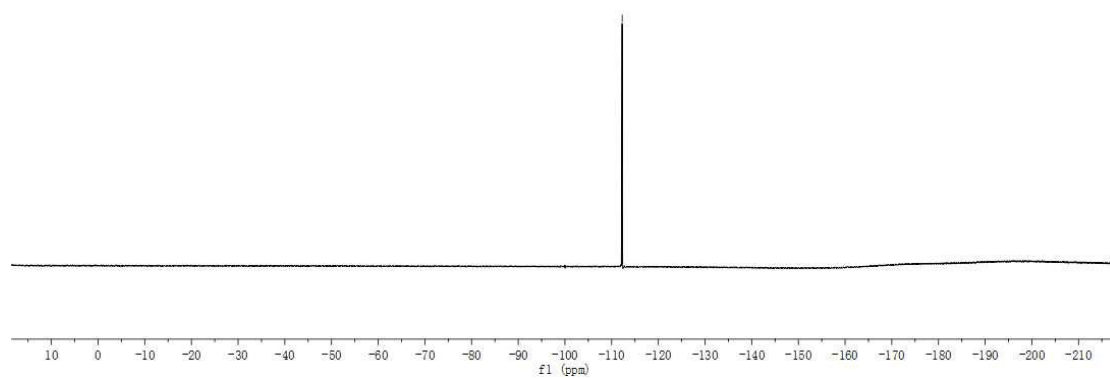

<sup>1</sup>H NMR spectrum of **3fa**

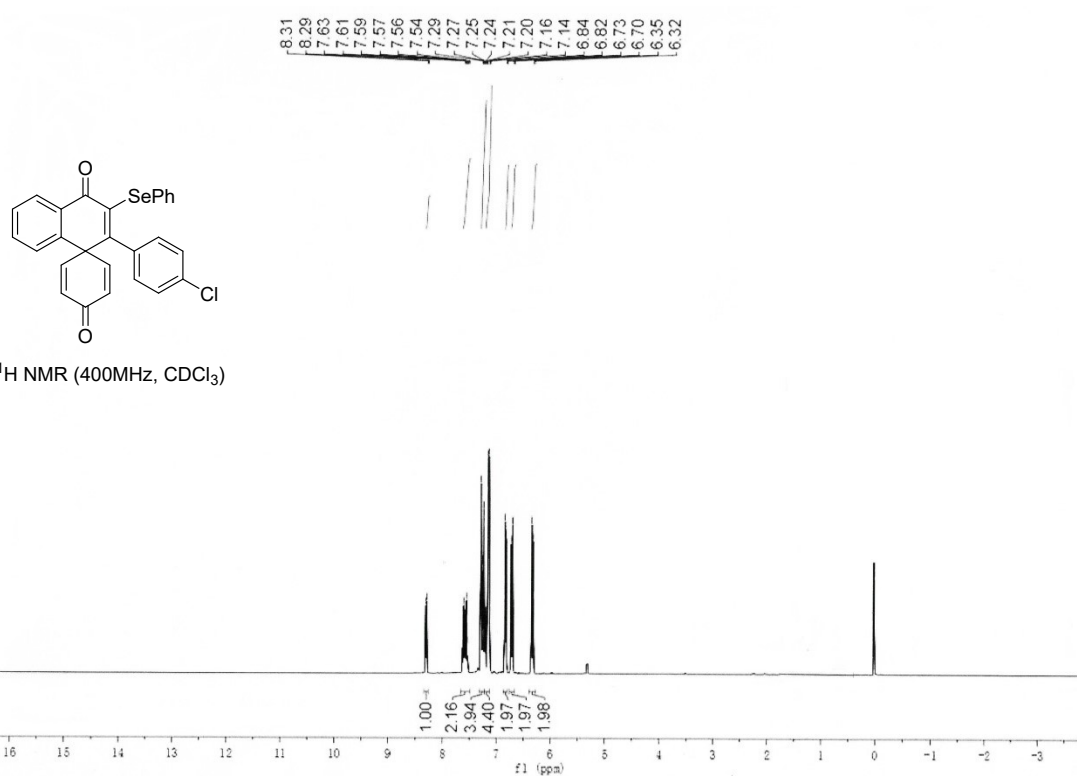

<sup>1</sup>H NMR (400MHz, CDCl<sub>3</sub>)

<sup>13</sup>C NMR spectrum of **3fa**

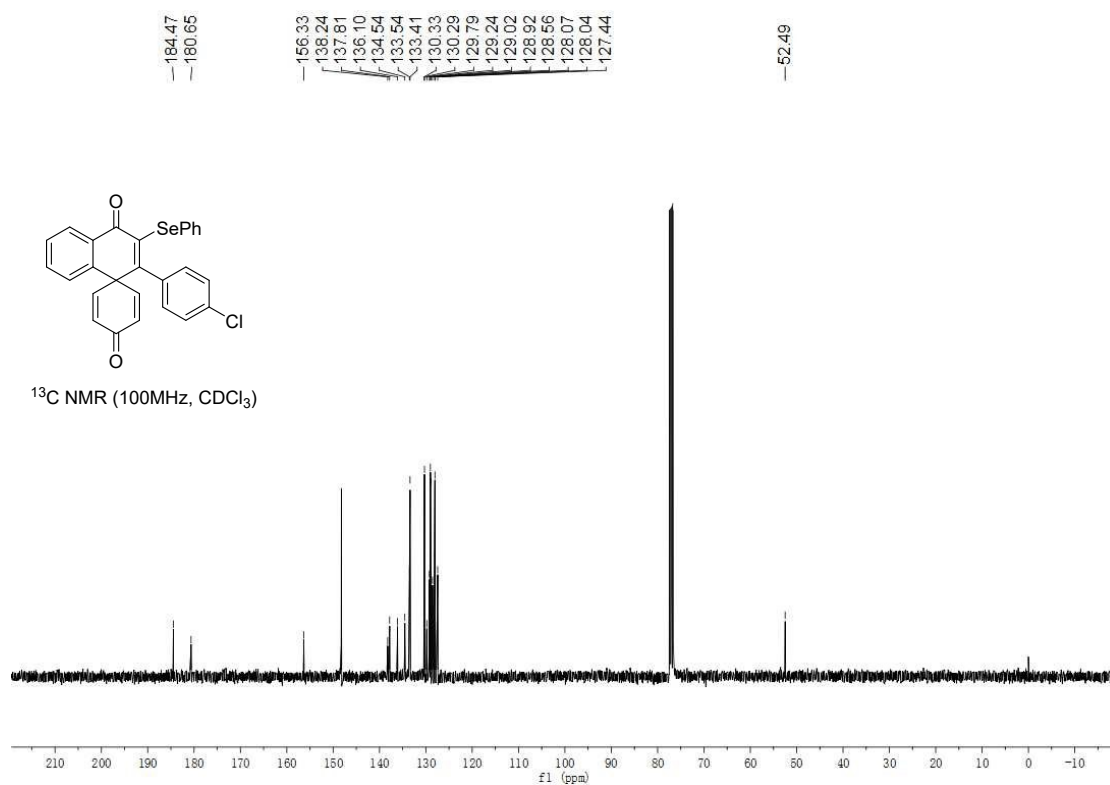

<sup>13</sup>C NMR (100MHz, CDCl<sub>3</sub>)

### <sup>1</sup>H NMR spectrum of **3ga**

CQ-24-4

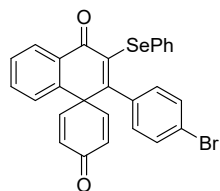

<sup>1</sup>H NMR (400MHz, CDCl<sub>3</sub>)

8.30  
8.29  
7.63  
7.61  
7.59  
7.57  
7.55  
7.54  
7.31  
7.29  
7.25  
7.23  
7.22  
7.16  
7.14  
7.12  
6.78  
6.76  
6.72  
6.35  
6.32

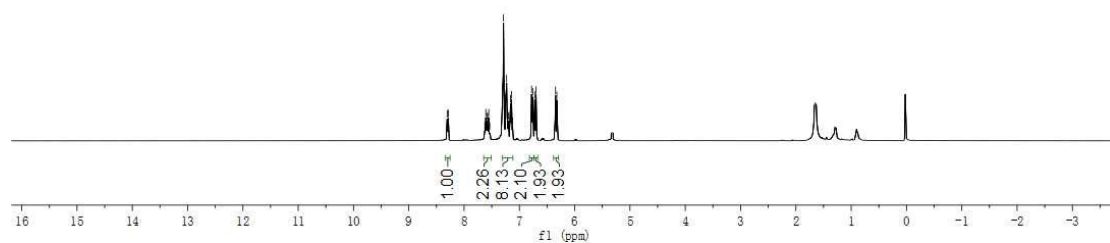

### <sup>13</sup>C NMR spectrum of **3ga**

CQ-24-4

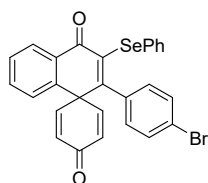

<sup>13</sup>C NMR (100MHz, CDCl<sub>3</sub>)

184.47  
180.66  
156.24  
138.20  
137.80  
136.55  
133.54  
133.45  
130.97  
130.30  
129.78  
129.24  
129.15  
129.03  
128.56  
128.07  
127.45  
122.80  
52.42

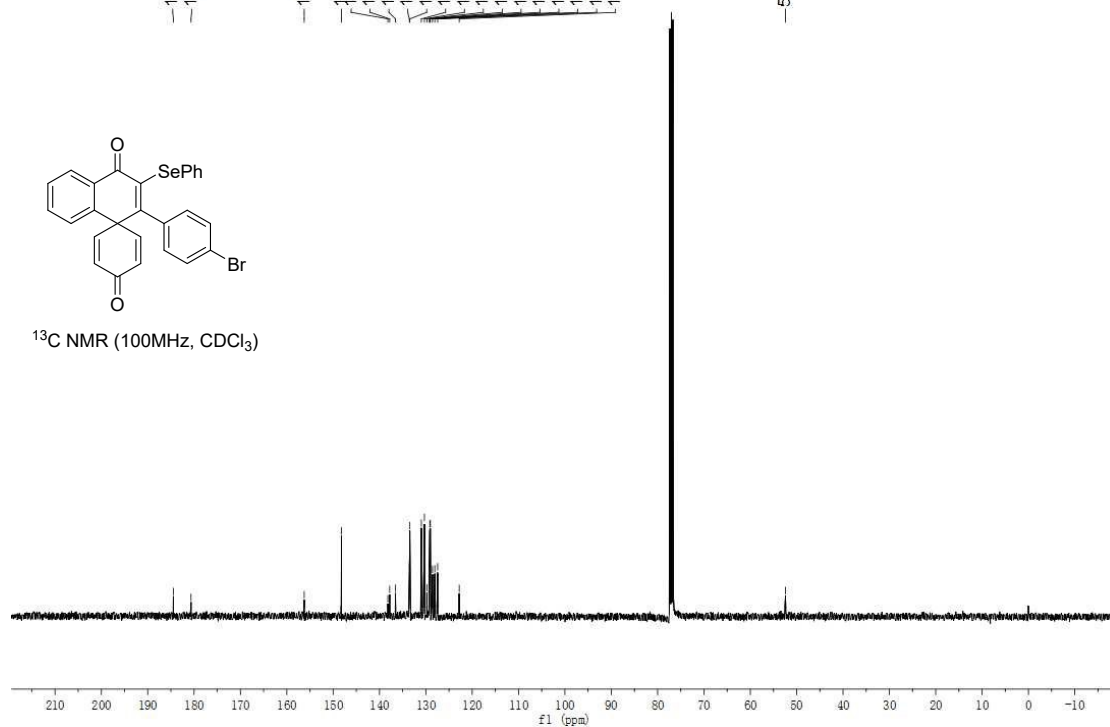

### <sup>1</sup>H NMR spectrum of **3ha**

CQ-22-4

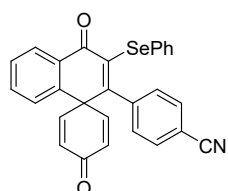

<sup>1</sup>H NMR (400MHz, CDCl<sub>3</sub>)

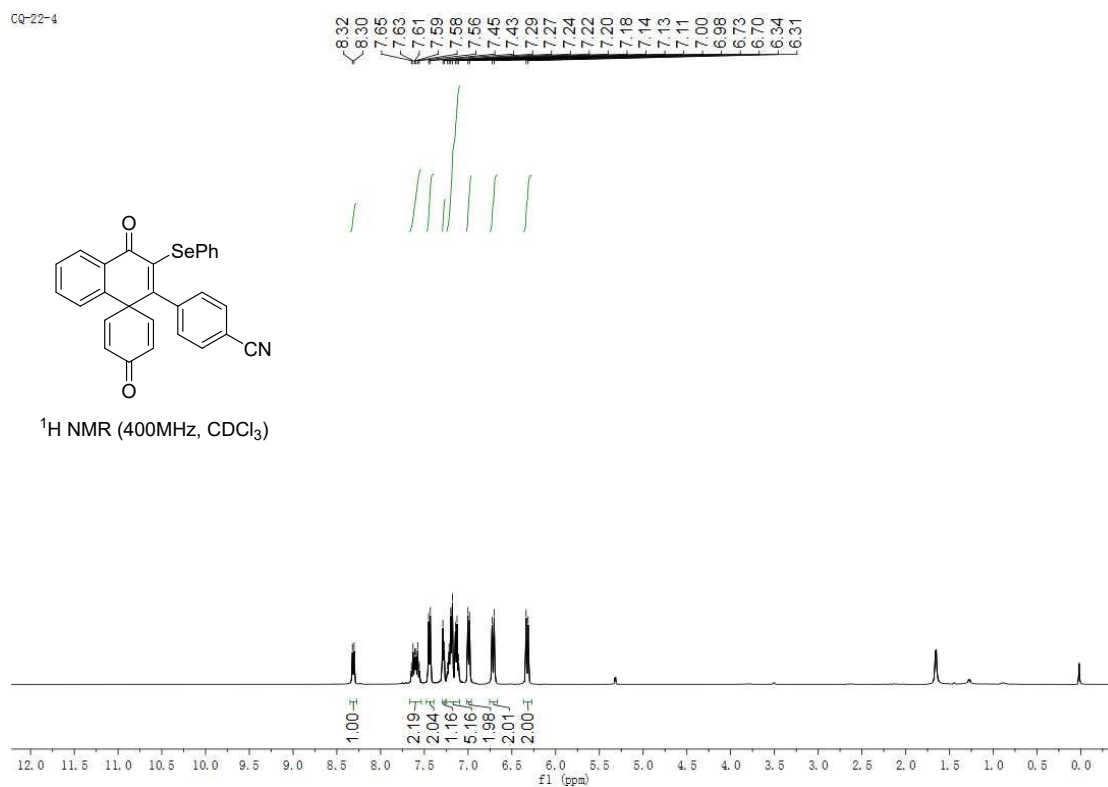

### <sup>13</sup>C NMR spectrum of **3ha**

CQ-22-4

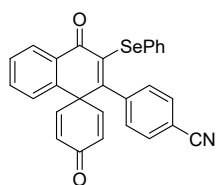

<sup>13</sup>C NMR (100MHz, CDCl<sub>3</sub>)

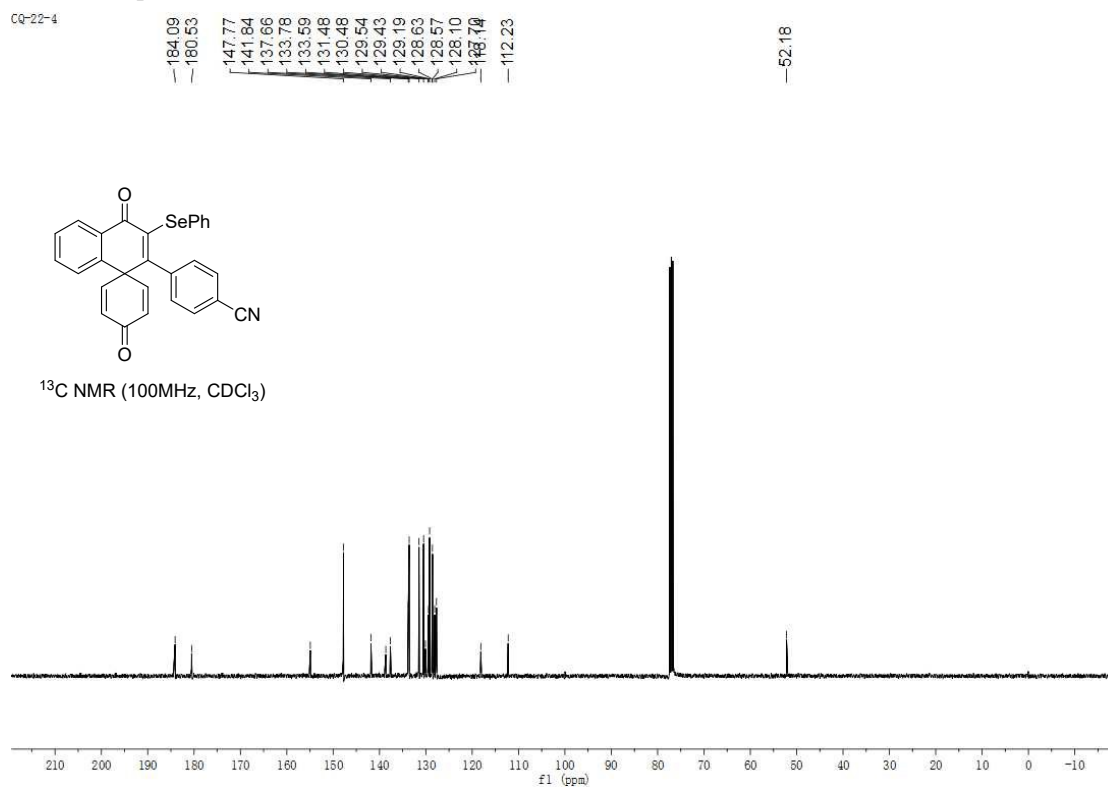

### <sup>1</sup>H NMR spectrum of **3ia**

cq-18

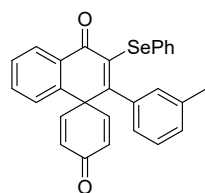

<sup>1</sup>H NMR (400MHz, CDCl<sub>3</sub>)

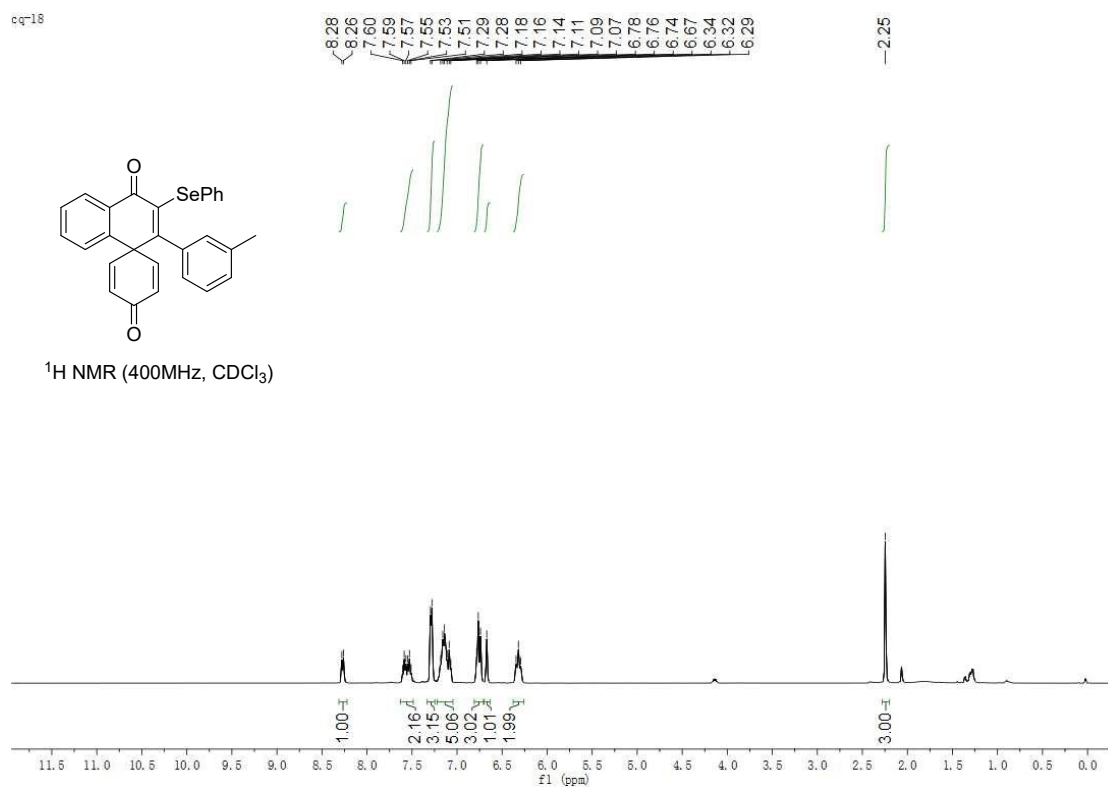

### <sup>13</sup>C NMR spectrum of **3ia**

cq-18

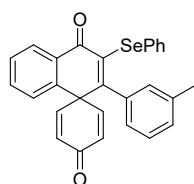

<sup>13</sup>C NMR (100MHz, CDCl<sub>3</sub>)

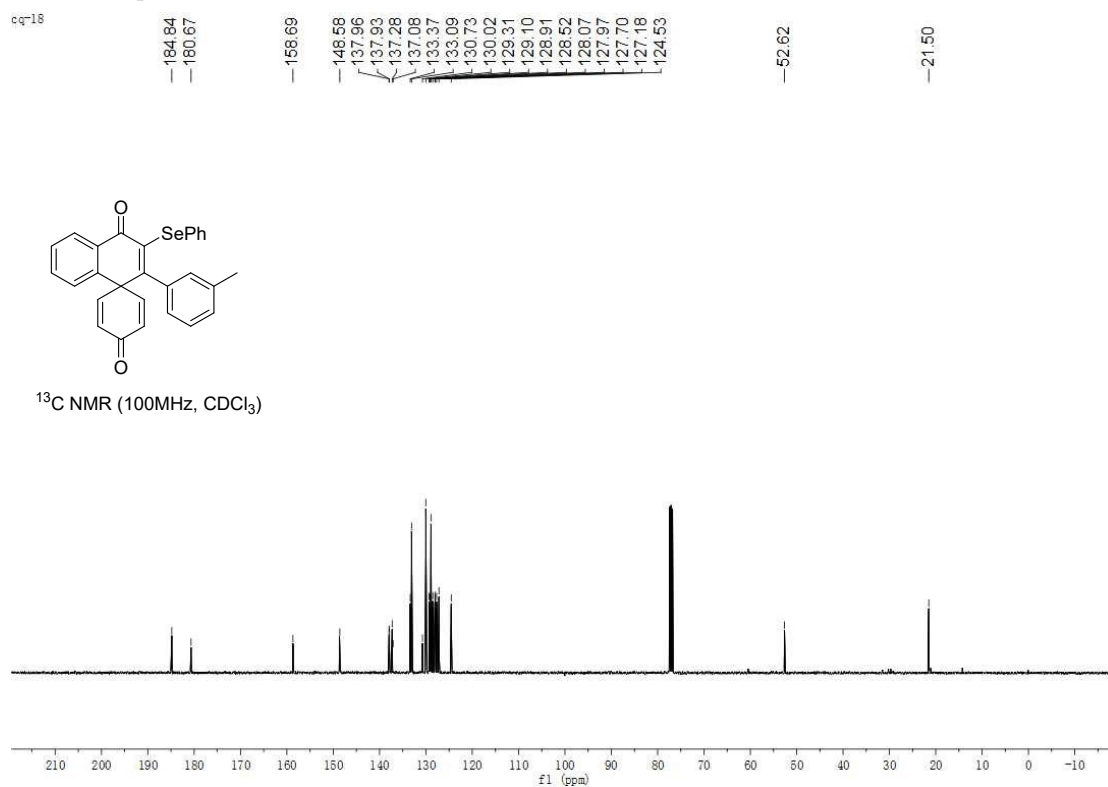



### <sup>1</sup>H NMR spectrum of **3ja**

CQ-21-6

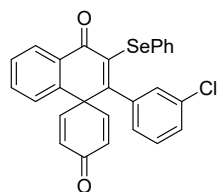

<sup>1</sup>H NMR (400MHz, CDCl<sub>3</sub>)

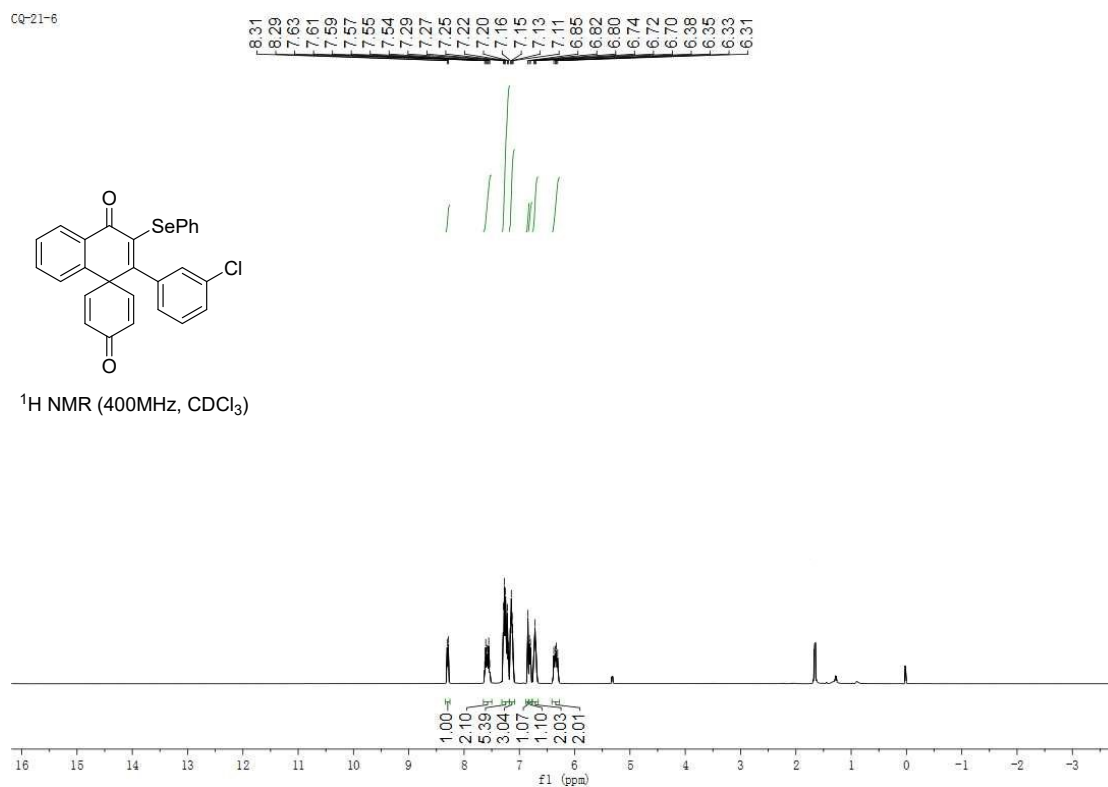

### <sup>13</sup>C NMR spectrum of **3ja**

CQ-21-2

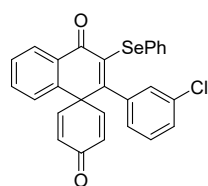

<sup>13</sup>C NMR (100MHz, CDCl<sub>3</sub>)

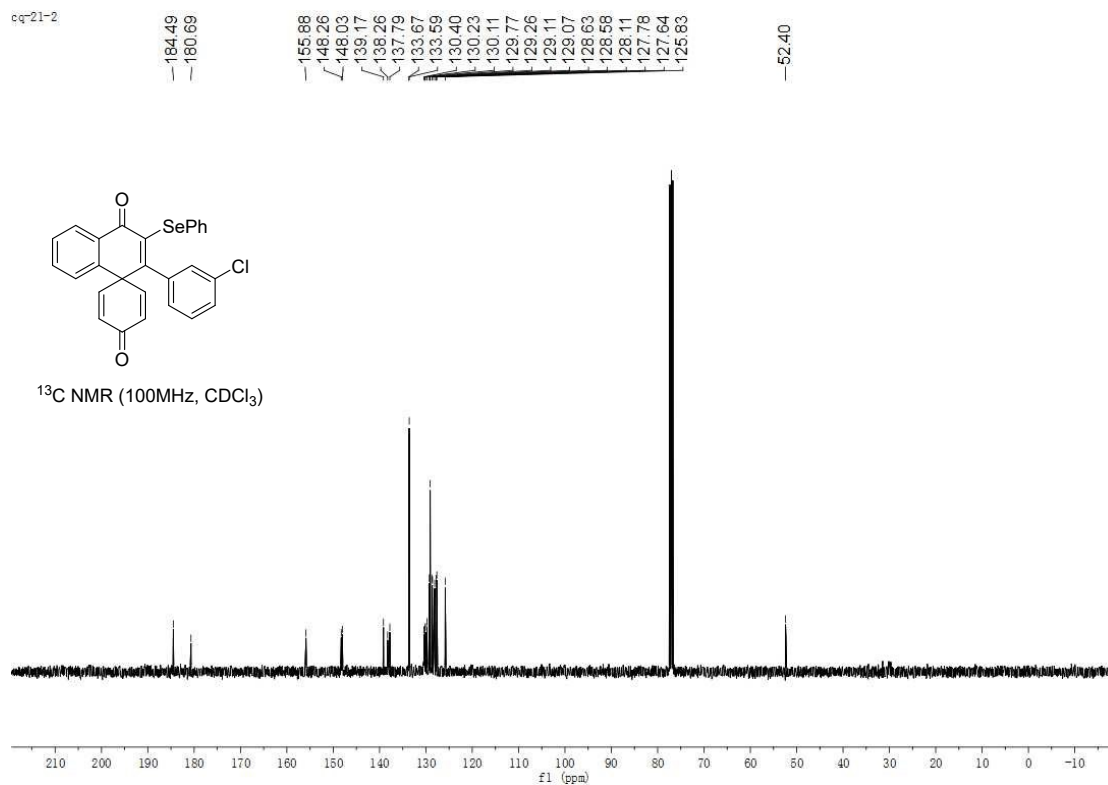

### <sup>1</sup>H NMR spectrum of **3ka**

cq-25-5

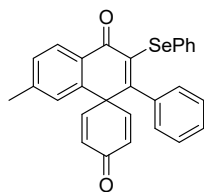

<sup>1</sup>H NMR (400MHz, CDCl<sub>3</sub>)

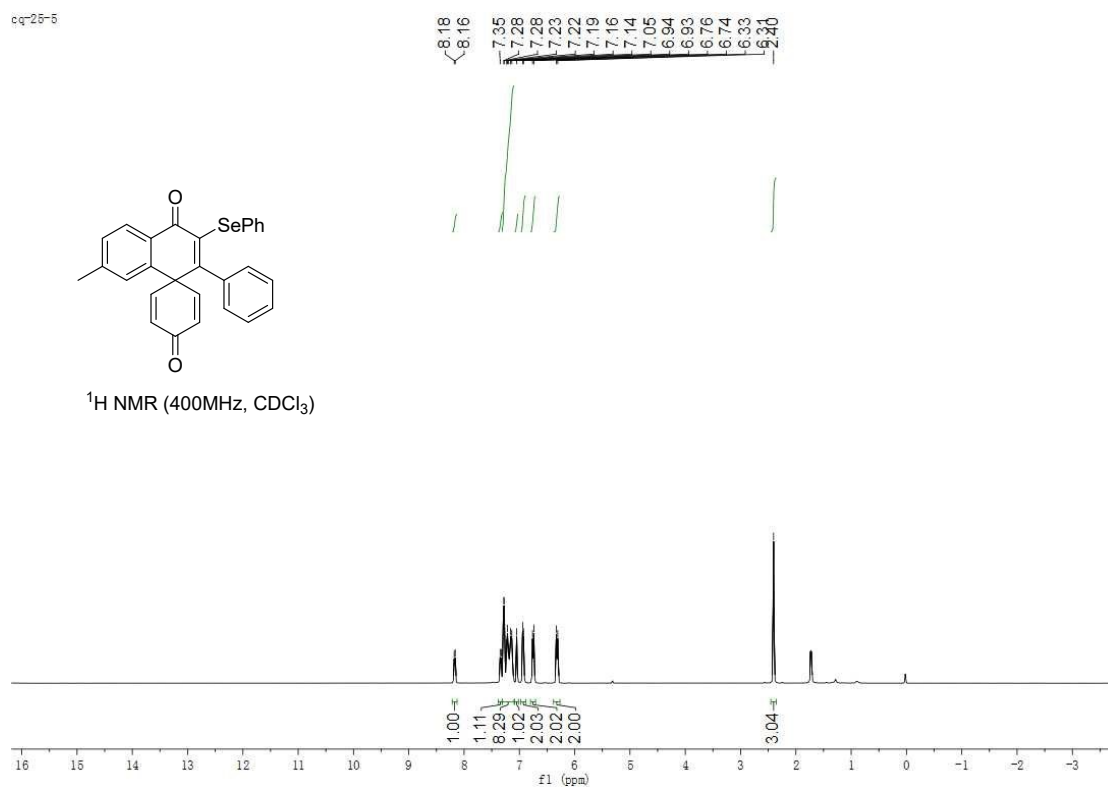

### <sup>13</sup>C NMR spectrum of **3ka**

cq-25-5

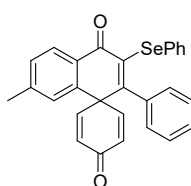

<sup>13</sup>C NMR (100MHz, CDCl<sub>3</sub>)

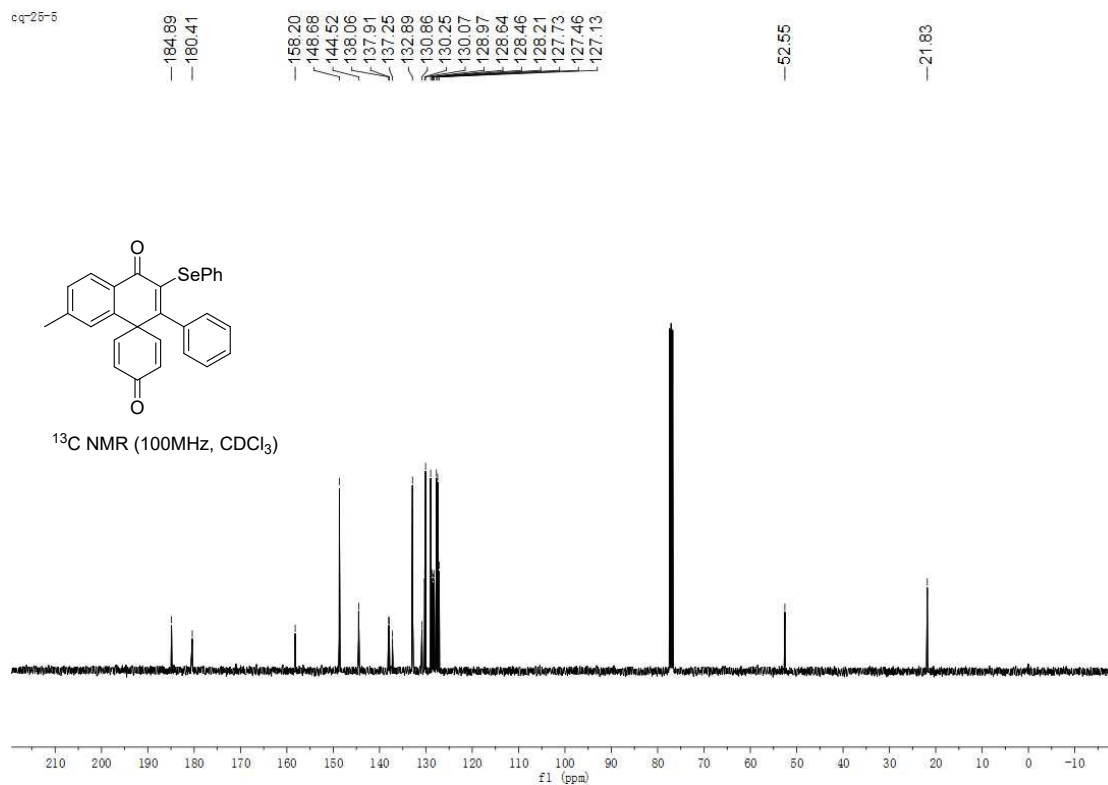

### <sup>1</sup>H NMR spectrum of **3la**

cq-27-4

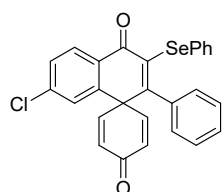

<sup>1</sup>H NMR (400MHz, CDCl<sub>3</sub>)

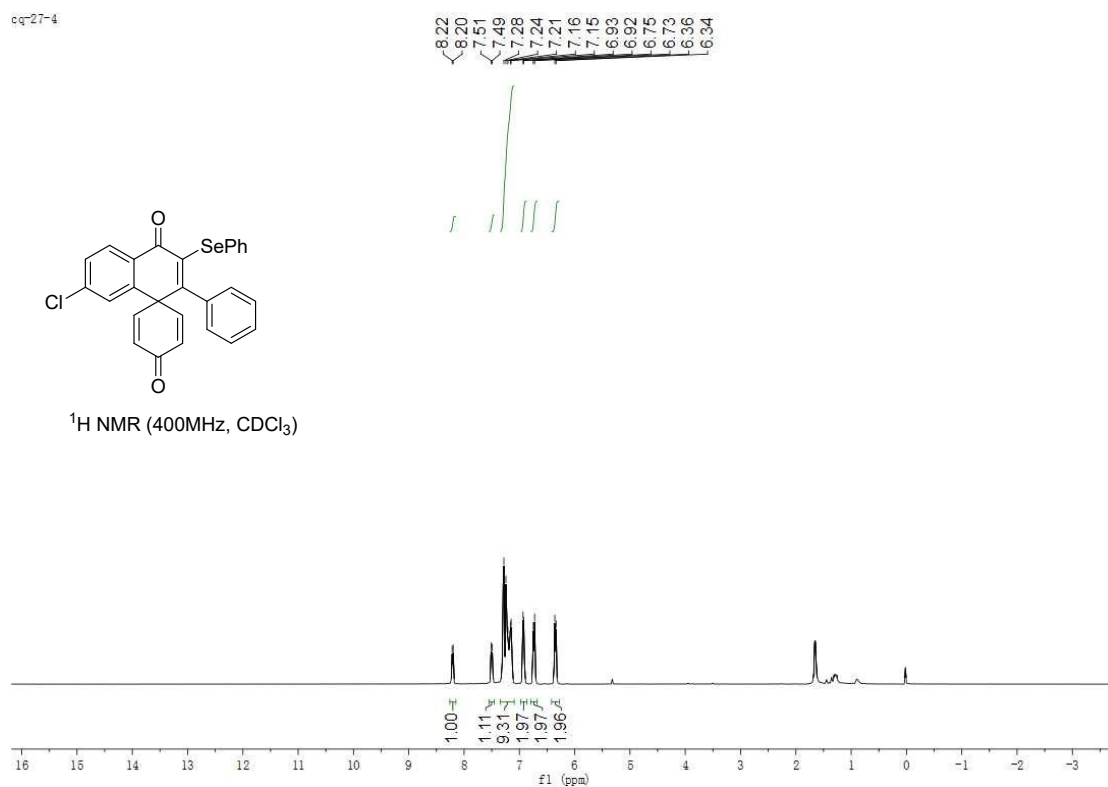

### <sup>13</sup>C NMR spectrum of **3la**

cq-27-4

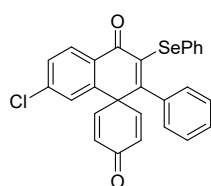

<sup>13</sup>C NMR (100MHz, CDCl<sub>3</sub>)

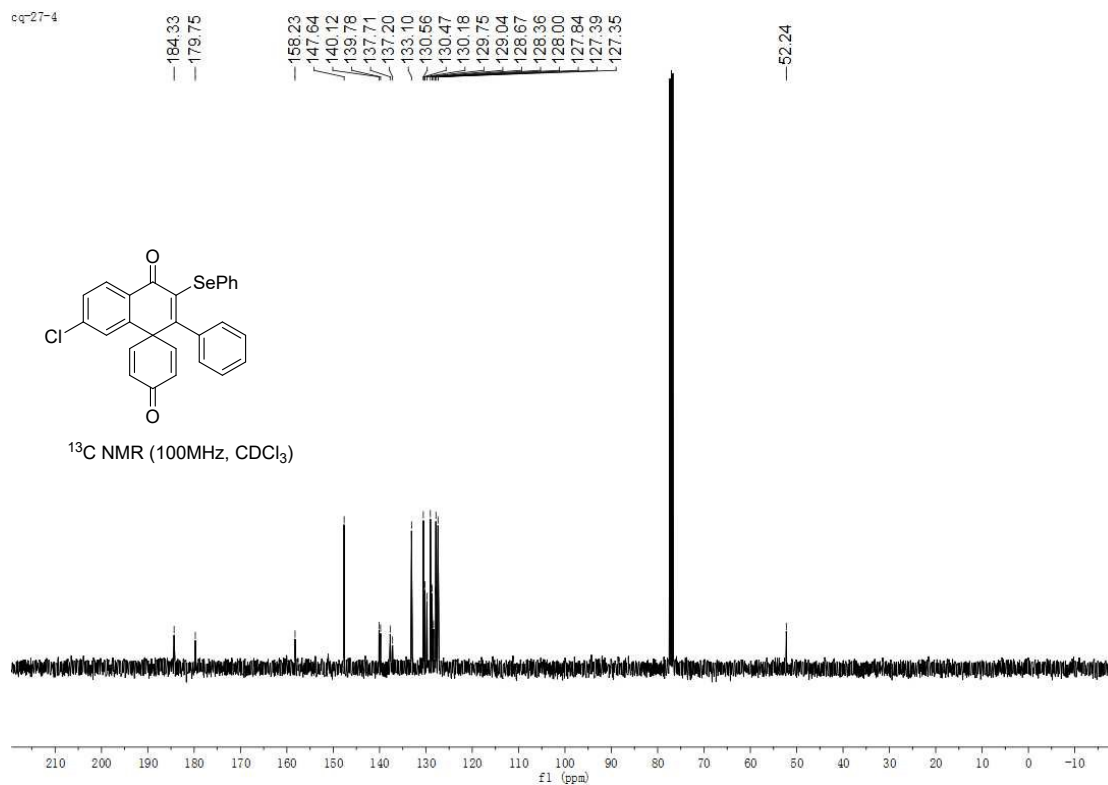

### <sup>1</sup>H NMR spectrum of **3ma**

cq-28-5

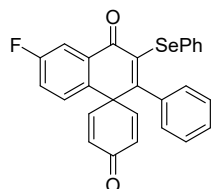

<sup>1</sup>H NMR (400MHz, CDCl<sub>3</sub>)

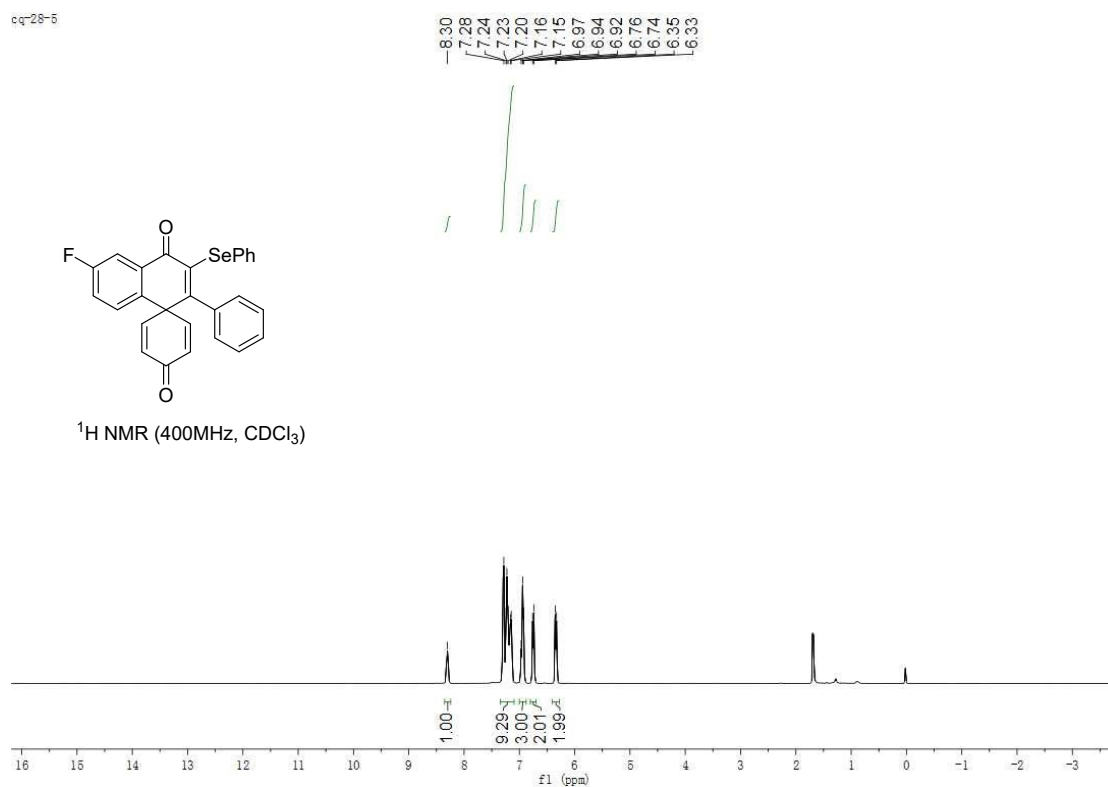

### <sup>13</sup>C NMR spectrum of **3ma**

cq-28-5

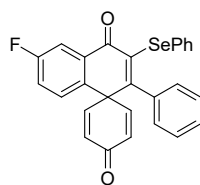

<sup>13</sup>C NMR (100MHz, CDCl<sub>3</sub>)

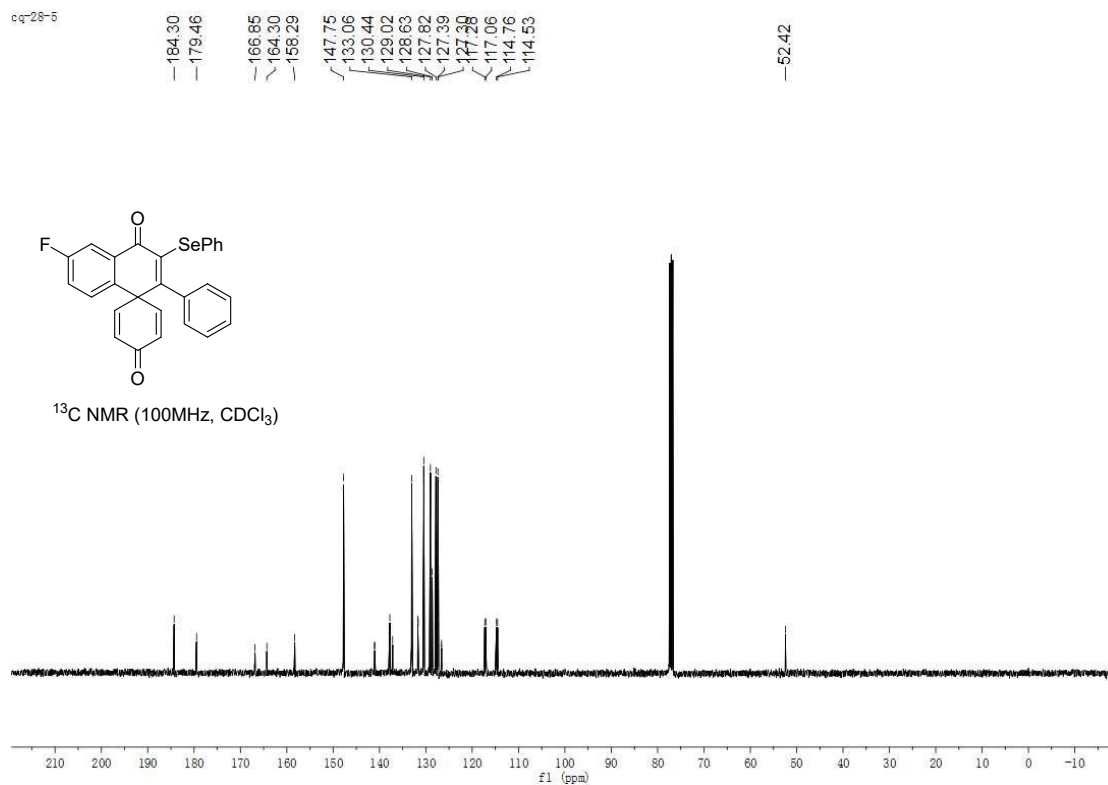

### $^{19}\text{F}$ NMR spectrum of **3ma**

cq-28-5

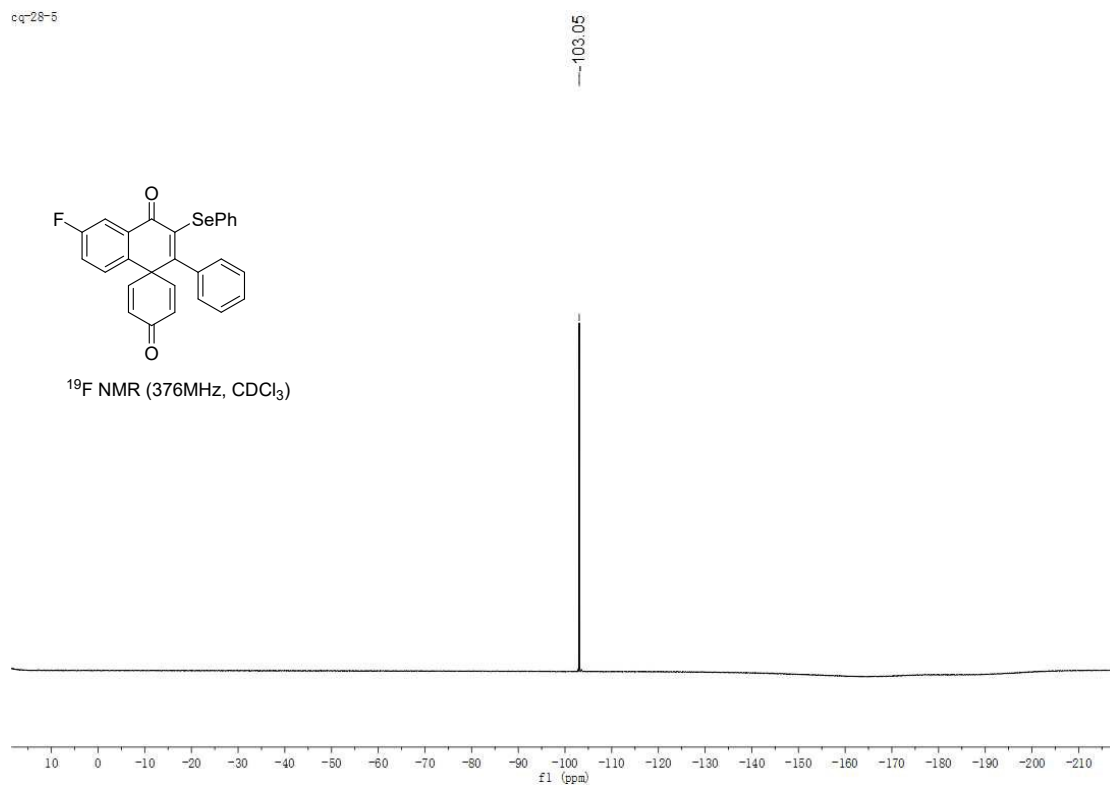

### $^1\text{H}$ NMR spectrum of **3na**

CQ-26-4

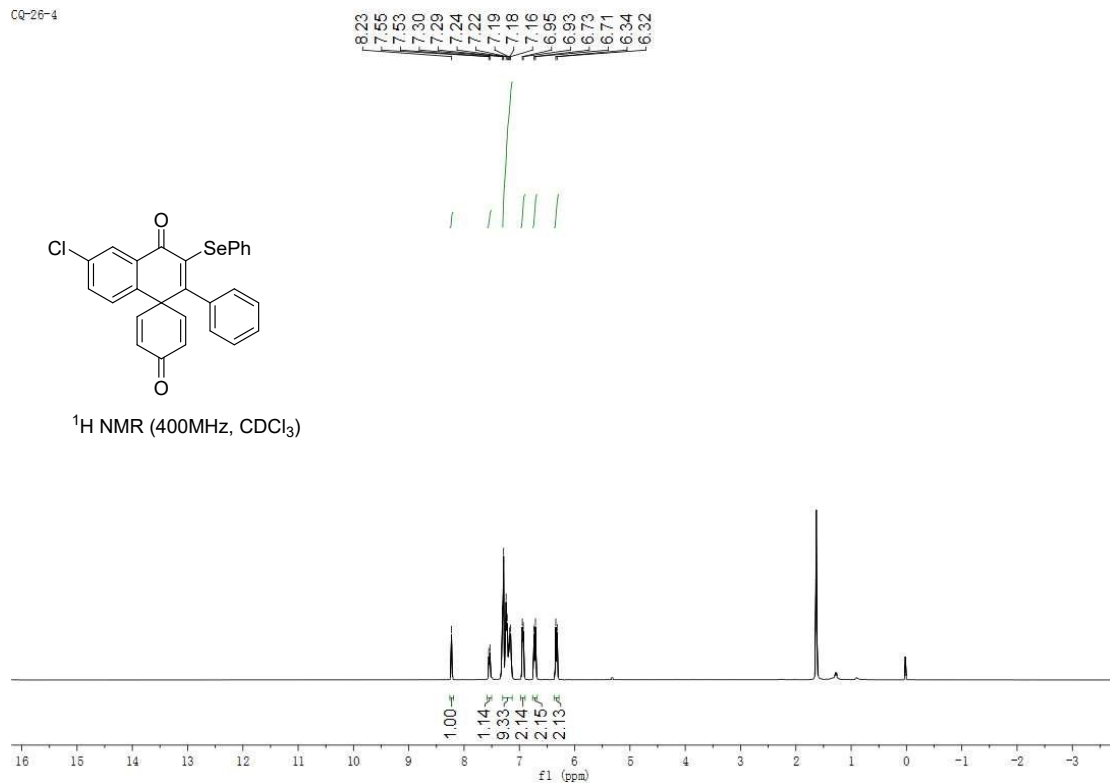

# <sup>13</sup>C NMR spectrum of **3na**

CQ-26-4

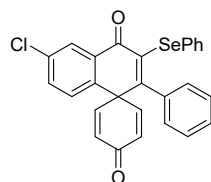

<sup>13</sup>C NMR (100MHz, CDCl<sub>3</sub>)

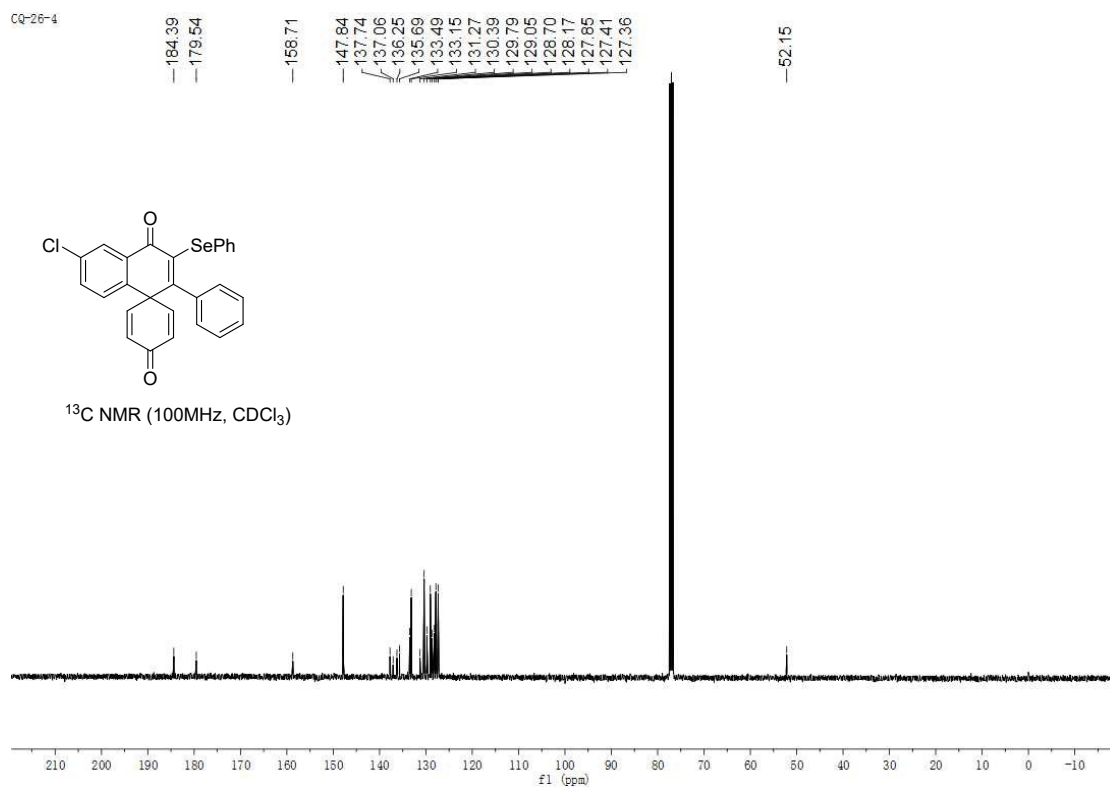

Supplement: d2ob01006b1.pdf [file d2ob01006b1.pdf]
